# Supplementary material for: Design, synthesis, and evaluation of nickel dipyridylmethane complexes for Coordination-Induced Spin State Switching (CISSS)
Source: Royal Society of Chemistry journal article supplement (doi:10.1039/c7dt03952b), 2017-12-22
Supplement: c7dt03952b1.pdf [file c7dt03952b1.pdf]

# Design, Synthesis, and Evaluation of Nickel Dipyridylmethane Complexes for Coordination-Induced Spin State Switching (CISSS)

Michaela Klaß, Jan Krahmer, Christian Näther, Felix Tuczek\*

## Table of Contents

|       |                                                                                                                                                                                                                                                               |     |
|-------|---------------------------------------------------------------------------------------------------------------------------------------------------------------------------------------------------------------------------------------------------------------|-----|
| S1    | Computational Details.....                                                                                                                                                                                                                                    | S2  |
| S1.1  | General Procedures.....                                                                                                                                                                                                                                       | S2  |
| S1.2  | Comparison of Calculated and Crystal Structures.....                                                                                                                                                                                                          | S2  |
| S1.3  | Binding Enthalpy of Pyridine to Different Nickel Complexes .....                                                                                                                                                                                              | S2  |
| S1.4  | Coordination Isomers of the Pentacoordinate Complexes .....                                                                                                                                                                                                   | S5  |
| S1.5  | Comparison of Binding Enthalpies in Low and High Spin Complexes .....                                                                                                                                                                                         | S5  |
| S1.6  | Substitution of the Methyl by Benzyl Groups .....                                                                                                                                                                                                             | S7  |
| S1.7  | Solvent Coordination.....                                                                                                                                                                                                                                     | S8  |
| S1.8  | Dimers .....                                                                                                                                                                                                                                                  | S9  |
| S1.9  | Reaction Enthalpies.....                                                                                                                                                                                                                                      | S11 |
| S1.10 | XYZ Atomic Coordinates of the PBE/def2-SVP Optimized Ligand and Complexes.....                                                                                                                                                                                | S12 |
| S2    | NMR Spectroscopic Studies of CISSS.....                                                                                                                                                                                                                       | S55 |
| S2.1  | Magnetic measurements.....                                                                                                                                                                                                                                    | S56 |
| S2.2  | Titration Curves .....                                                                                                                                                                                                                                        | S57 |
| S2.3  | Dilution Experiments.....                                                                                                                                                                                                                                     | S59 |
| S2.4  | Evaluation of Equilibria.....                                                                                                                                                                                                                                 | S60 |
| S3    | Selected Crystal Data .....                                                                                                                                                                                                                                   | S76 |
| S3.1  | [6,6'-(1-methoxy-1,1-ethanediy)bis(2-pyridinecarboxylato-N,O)]nickel(II) ( <b>1a</b> ) .....                                                                                                                                                                  | S77 |
| S3.2  | [6,6'-(1-methoxy-1,1-ethanediy)bis(2-pyridinecarboxylato-N,O)]di(pyridine)nickel(II) ( <b>1a</b> (py) <sub>2</sub> ).....                                                                                                                                     | S78 |
| S3.3  | (Di{ethanol}{6-[1-methoxy-1-(2-carboxylato-6-pyridyl-N,O)-1-ethyl][ $\mu^2$ -2-pyridinecarboxylato-N,O,O']})nickel(II))(ethanol)[6,6'-(1-methoxy-1,1-ethanediy)bis(2-pyridinecarboxylato-N,O)]nickel(II) ( <b>1a</b> <sub>2</sub> (EtOH) <sub>3</sub> ) ..... | S79 |
| S4    | References.....                                                                                                                                                                                                                                               | S80 |

## S1 Computational Details

### S1.1 General Procedures

All calculations were conducted with Gaussian 09, Revision D.01.<sup>1</sup> Geometry optimizations were performed at the PBE<sup>2,3</sup>/def2-SVP<sup>4,5</sup> level of theory. Harmonic frequency analyses were carried out at the same level to confirm that a minimum was reached and to obtain values for the entropy and the thermal correction to enthalpy. Single point energies were calculated at the optimized geometries using B3LYP<sup>6</sup>/def2-TZVP<sup>4,5</sup>. These methods were chosen because they have shown best performance in predicting experimental data for porphyrin-based CISSS-systems.<sup>7</sup>

### S1.2 Comparison of Calculated and Crystal Structures

The optimized structures for the complexes **1a** and **1a(py)<sub>2</sub>** (see section S1.10.17) were superimposed with the solid state molecular structures (see section S3) using the program Mercury 3.5.1. The root mean square deviations (RMSD) of 0.15 Å and 0.21 Å, respectively, indicate the calculated and the single crystal molecular structures being in good agreement and PBE/def2-SVP being sufficient for geometry optimization.

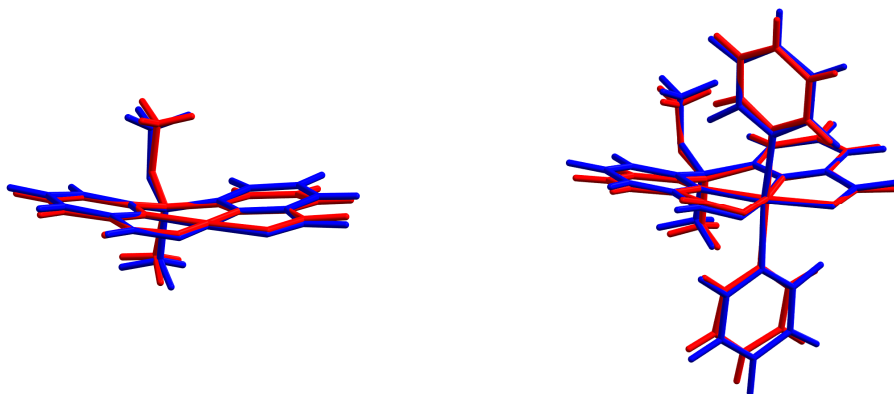

**Figure S1:** Overlay of solid state structures (red) with the calculated structures (blue, PBE/def2-SVP) for complexes **1a** (left) and **1a(py)<sub>2</sub>** (right).

### S1.3 Binding Enthalpy of Pyridine to Different Nickel Complexes

Binding enthalpies  $\Delta H_{\text{Ni-Py}}$  of pyridine to the nickel complexes with dipyrityldmethanes containing different ligating anionic residues were determined as the difference between the enthalpy of the triplet pentacoordinate complex ( $H_{\text{NiPy}}$ ) and the sum of the enthalpies of the singlet tetracoordinate complex ( $H_{\text{Ni}}$ ) and the non-binding pyridine ( $H_{\text{Py}}$ ). Enthalpies  $H$  were determined by revising the electronic energies  $E_{\text{elec}}$  extracted from the single point energy calculations by the addition of the zero point energy and the thermal correction from harmonic frequency analyses  $H_{\text{corr}}$  (in Gaussian: thermal correction to enthalpy).

$$H = E_{\text{elec}} + H_{\text{corr}} \quad (\text{S1})$$

$$\Delta H_{\text{Ni-Py}} = H_{\text{NiPy}} - (H_{\text{Ni}} + H_{\text{Py}}) \quad (\text{S2})$$

Where the binding enthalpy is negative, the coordination of pyridine is favored.

$E_{\text{elec,Py}} = -248.37686420$  Hartree

$H_{\text{corr,Py}} = 0.091702$  Hartree

**Table S1.** Absolute energies ( $E_{\text{elec}}$ ) and corrections to enthalpy ( $H_{\text{corr}}$ ) of tetracoordinate nickel dipyridylmethane complexes and pentacoordinate pyridine adducts as well as the hereby calculated binding enthalpies of pyridine to the complexes ( $\Delta H_{\text{Ni-Py}}$ ).

|                                                                                     | $E_{\text{elec,Ni}} / \text{Hartree}$ | $H_{\text{corr,Ni}} / \text{Hartree}$ | $E_{\text{elec,NiPy}} / \text{Hartree}$ | $H_{\text{corr,NiPy}} / \text{Hartree}$ | $\Delta H_{\text{Ni-Py}} / \text{kcal}\cdot\text{mol}^{-1}$ |
|-------------------------------------------------------------------------------------|---------------------------------------|---------------------------------------|-----------------------------------------|-----------------------------------------|-------------------------------------------------------------|
| 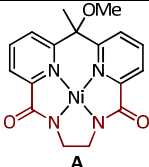   | -2611.01474264                        | 0.328866                              | -2859.35871418                          | 0.420712                                | +20.7                                                       |
|    | -2767.10938902                        | 0.423455                              | -3015.45533049                          | 0.515356                                | +19.5                                                       |
|   | -2763.51015677                        | 0.354444                              | -3011.85696642                          | 0.446492                                | +19.1                                                       |
|  | -2962.06697249                        | 0.340117                              | -3210.41465826                          | 0.432313                                | +18.6                                                       |
|  | -2650.27579139                        | 0.358619                              | -2898.71369402                          | 0.450925                                | +9.8                                                        |
|  | -2917.18983459                        | 0.403142                              | -3165.55500907                          | 0.495775                                | +8.2                                                        |
|  | -2533.58622008                        | 0.293594                              | -2781.95339133                          | 0.386453                                | +6.8                                                        |

|                                                                                     | $E_{\text{elec,Ni}} / \text{Hartree}$ | $H_{\text{corr,Ni}} / \text{Hartree}$ | $E_{\text{elec,NiPy}} / \text{Hartree}$ | $H_{\text{corr,NiPy}} / \text{Hartree}$ | $\Delta H_{\text{Ni-Py}} / \text{kcal}\cdot\text{mol}^{-1}$ |
|-------------------------------------------------------------------------------------|---------------------------------------|---------------------------------------|-----------------------------------------|-----------------------------------------|-------------------------------------------------------------|
| 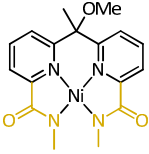   | -2612.21506135                        | 0.350541                              | -2860.58829618                          | 0.443274                                | +2.9                                                        |
|    | -2614.15809462                        | 0.365778                              | -2862.53389931                          | 0.458787                                | +1.5                                                        |
|    | -2646.21739490                        | 0.342405                              | -2894.59592763                          | 0.435374                                | -0.3                                                        |
|    | -2646.27339024                        | 0.343411                              | -2894.65245306                          | 0.436495                                | -0.5                                                        |
|   | -3320.60913089                        | 0.359231                              | -3568.99137492                          | 0.452311                                | -2.5                                                        |
|  | -2653.95410417                        | 0.342153                              | -2902.33676685                          | 0.435173                                | -2.8                                                        |
|  | -2678.28234085                        | 0.318432                              | -2926.66655702                          | 0.411826                                | -3.6                                                        |
|  | -3352.72392728                        | 0.336675                              | -3601.11023590                          | 0.430032                                | -4.9                                                        |
|  | -2573.34788283                        | 0.268795                              | -2821.73421271                          | 0.361986                                | -5.0                                                        |
|  |                                       |                                       |                                         |                                         |                                                             |

### S1.4 Coordination Isomers of the Pentacoordinate Complexes

The two sides of the square planar complexes are diastereotopic. Therefore, there are two possibilities for the coordination of the first pyridine (compare Figure S3). According to the calculations, the coordination on the side of the methyl group is favored by 0.2 to 2.6 kcal·mol<sup>-1</sup> (concerning the relevant complexes with negative binding enthalpies). Nevertheless, we used the isomer where pyridine coordinates from the methoxy side for the classification of the residues because in future LD-CISS complexes the azopyridine is also supposed to bind from this side.

### S1.5 Comparison of Binding Enthalpies in Low and High Spin Complexes

To show that spin state switching indeed takes place when a fifth ligand coordinates to the square planar nickel complex, singlet and triplet state complexes were compared. For this purpose, fully relaxed structures for each spin state were calculated (Figure S2). Interatomic distances between nickel and the pyridine nitrogen in singlet states are too long for actual coordinative bonds; i.e., the pyridine only weakly interacts with the nickel atom.

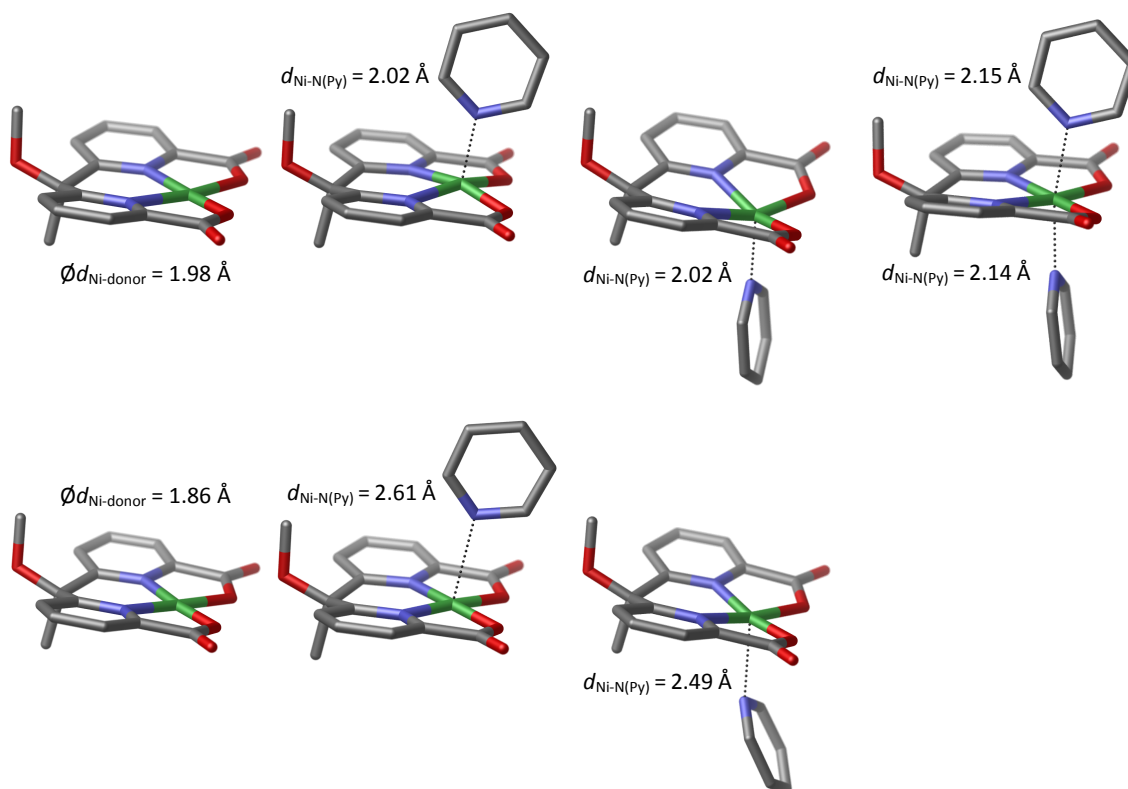

**Figure S2.** Optimized structures of complex **1a** in its square planar, the two square pyramidal and octahedral form with selected bond length. Triplet states are presented at the top and singlet states at the bottom. An appropriate structure for the singlet octahedral complex could not be obtained because the geometry optimization did not converge.

The results of the binding enthalpy calculations show that the complex does not bind pyridine in its diamagnetic state (Figure S3). Thus, spin state switching takes place with the formation of the square pyramidal complex. The sum of the binding enthalpies in the square pyramidal complexes is  $\Sigma\Delta H_{\text{Ni-Py}} = -10.8$  kcal·mol<sup>-1</sup>. Since the binding enthalpy of two pyridine molecules in the octahedral complex amounts to  $\Delta H_{\text{Ni-2Py}} = -13.0$  kcal·mol<sup>-1</sup>, the coordination of the second pyridine is facilitated by a cooperative effect of 2.2 kcal·mol<sup>-1</sup>.

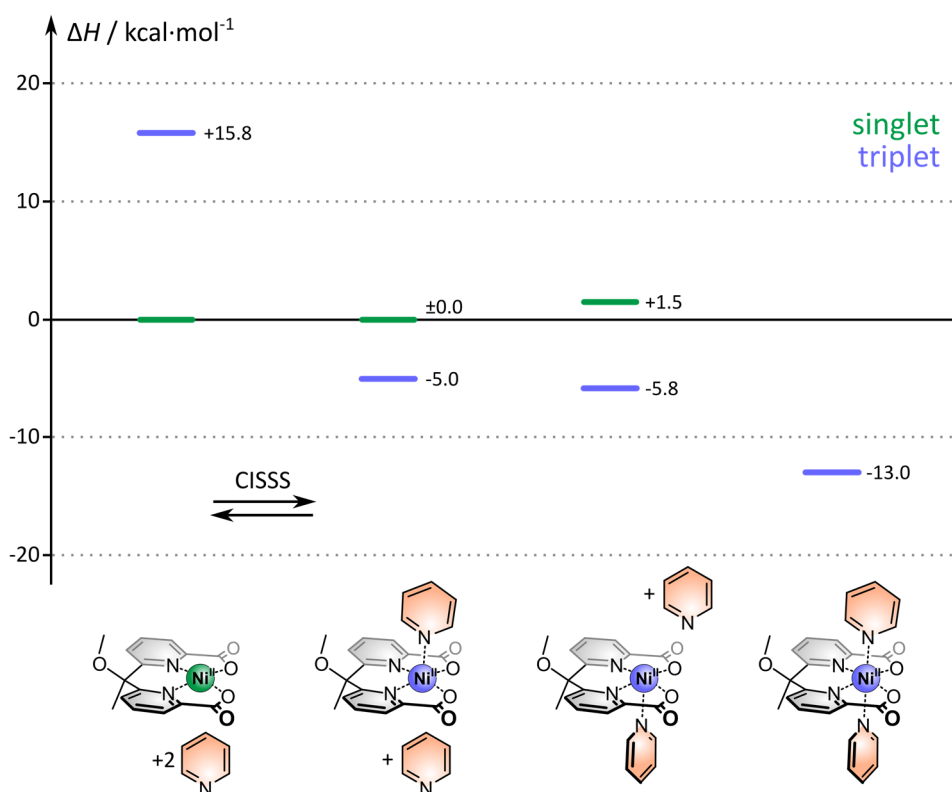

**Figure S3.** Enthalpies of different pyridine adducts of nickel complex **1a** relative to the diamagnetic square planar complex including two non-coordinating pyridine molecules. Spin state switching takes place with the association of the first pyridine.

**Table S2.** Absolute energies ( $E_{\text{elec}}$ ) and corrections to enthalpy ( $H_{\text{corr}}$ ) of singlet and triplet states of the tetracoordinate nickel dipyritydimethane complex **1a** and the penta- and hexacoordinate pyridine adducts as well as the hereby calculated enthalpies relative to the square planar complex in singlet state and two non-coordinating pyridine molecules ( $\Delta H$ ).

|                                                  | $E_{\text{elec}} / \text{Hartree}$ | $H_{\text{corr}} / \text{Hartree}$ | $\Delta H / \text{kcal}\cdot\text{mol}^{-1}$ |
|--------------------------------------------------|------------------------------------|------------------------------------|----------------------------------------------|
| <b>1a</b> , $S = 0$                              | -2573.34788283                     | 0.268795                           |                                              |
| <b>1a</b> , $S = 1$                              | -2573.32463078                     | 0.270667                           | +15.8                                        |
| <b>1a(py)</b> , $S = 1$<br>MeO-side coordination | -2821.73421271                     | 0.361986                           | -5.0                                         |
| <b>1a(py)</b> , $S = 0$<br>MeO-side coordination | -2821.72676541                     | 0.362535                           | $\pm 0.0$                                    |
| <b>1a(py)</b> , $S = 1$<br>Me-side coordination  | -2821.73072161                     | 0.362156                           | -5.8                                         |
| <b>1a(py)</b> , $S = 0$<br>Me-side coordination  | -2821.72429288                     | 0.362467                           | +1.5                                         |
| <b>1a(py)<sub>2</sub></b> , $S = 1$              | -3070.12608411                     | 0.455952                           | -13.0                                        |

### S1.6 Substitution of the Methyl by Benzyl Groups

To enhance the solubility of complex **1a** in non-coordinating solvents the methyl group was substituted by different benzyl groups (**1b-1d**). According to the calculations, the influence of this substitution on the binding enthalpies is negligible (Figure S4).

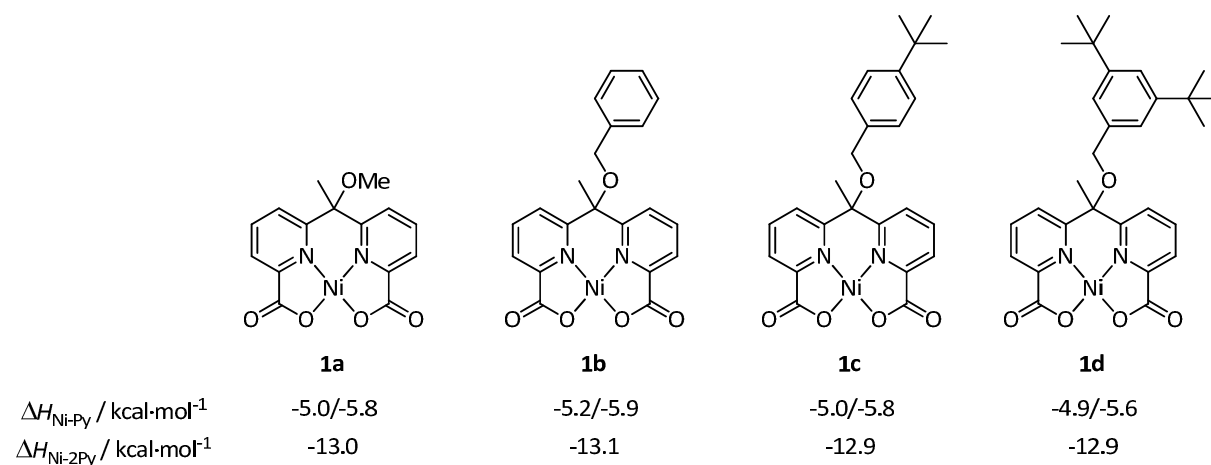

**Figure S4.** Nickel dipyritylmethane complexes **1a-d** with different residues on the hydroxy group and binding enthalpies of one ( $\Delta H_{\text{Ni-Py}}$ ) or two pyridines ( $\Delta H_{\text{Ni-2Py}}$ ).

**Table S3.** Absolute energies ( $E_{\text{elec}}$ ) and corrections to enthalpy ( $H_{\text{corr}}$ ) of singlet and triplet states of the tetracoordinate nickel dipyritylmethane complex **1a** and the penta- and hexacoordinate pyridine adducts as well as the hereby calculated binding enthalpies relative to the square planar complex in singlet state and two unbound pyridine molecules ( $\Delta H$ ).

|                                                    | $E_{\text{elec}} / \text{Hartree}$ | $H_{\text{corr}} / \text{Hartree}$ | $\Delta H / \text{kcal}\cdot\text{mol}^{-1}$ |
|----------------------------------------------------|------------------------------------|------------------------------------|----------------------------------------------|
| <b>1b</b>                                          | -2804.48028703                     | 0.352709                           |                                              |
| <b>1b(py)</b>                                      |                                    |                                    |                                              |
| BnO-side coordination                              | -3052.86673350                     | 0.445748                           | -5.2                                         |
| <b>1b(py)</b>                                      |                                    |                                    |                                              |
| Me-side coordination                               | -3052.86799159                     | 0.445883                           | -5.9                                         |
| <b>1b(py)<sub>2</sub></b>                          | -3301.25856285                     | 0.539772                           | -13.1                                        |
| <b>1c</b>                                          | -2961.78933607                     | 0.466937                           |                                              |
| <b>1c(py)</b>                                      |                                    |                                    |                                              |
| <sup>t</sup> BuBnO-side coordination               | -3210.17574499                     | 0.560155                           | -5.0                                         |
| <b>1c(py)</b>                                      |                                    |                                    |                                              |
| Me-side coordination                               | -3210.17703795                     | 0.560165                           | -5.8                                         |
| <b>1c(py)<sub>2</sub></b>                          | -3458.56749057                     | 0.654133                           | -12.9                                        |
| <b>1d</b>                                          | -3119.09777153                     | 0.581297                           |                                              |
| <b>1d(py)</b>                                      |                                    |                                    |                                              |
| <sup>t</sup> Bu <sub>2</sub> BnO-side coordination | -3367.48391289                     | 0.674432                           | -4.9                                         |
| <b>1d(py)</b>                                      |                                    |                                    |                                              |
| Me-side coordination                               | -3367.48515437                     | 0.674549                           | -5.6                                         |
| <b>1d(py)<sub>2</sub></b>                          | -3615.87567993                     | 0.768362                           | -12.9                                        |
| <b>1e</b>                                          | -2848.63908457                     | 0.472018                           |                                              |
| <b>1e(py)</b>                                      |                                    |                                    |                                              |
| MeO-side coordination                              | -3097.02488662                     | 0.565084                           | -4.8                                         |
| <b>1e(py)</b>                                      |                                    |                                    |                                              |
| Oct-side coordination                              | -3097.02655033                     | 0.565328                           | -5.6                                         |
| <b>1e(py)<sub>2</sub></b>                          | -3345.41679195                     | 0.659148                           | -12.7                                        |

### S1.7 Solvent Coordination

The pyridine titration was performed in dichloromethane as a solvent. To determine if the solvent has an effect on the coordination and the magnetism, several DCM adducts were calculated.

Without the presence of pyridine, the coordination of DCM is disfavored: In the low spin state it decoordinates, in the high spin state the binding enthalpy is positive (Figure S5). Thus, the tetracoordinate state is favored.

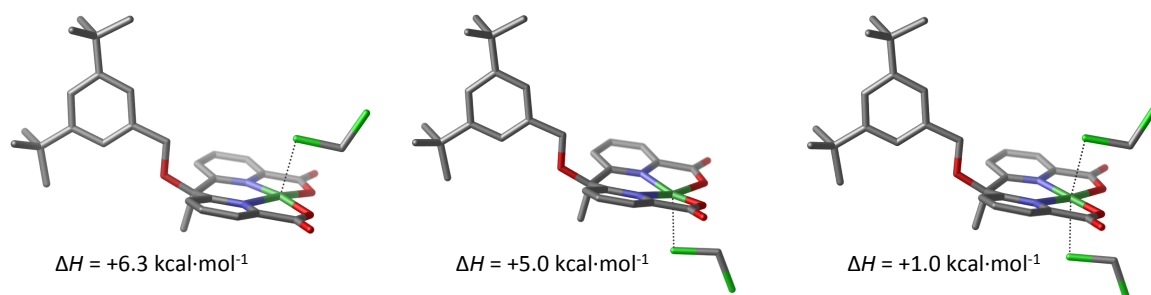

**Figure S5.** Optimized structures of dichloromethane adducts of complex **1d** in triplet state with the corresponding binding enthalpies for the dashed bonds.

When one pyridine molecule is already coordinated, the coordination of a DCM molecule at the sixth coordination site stabilizes the high spin state by 3.8 or 3.3 kcal·mol<sup>-1</sup>, respectively (Figure S6). The DCM coordination competes with the binding a second pyridine (see section S2).

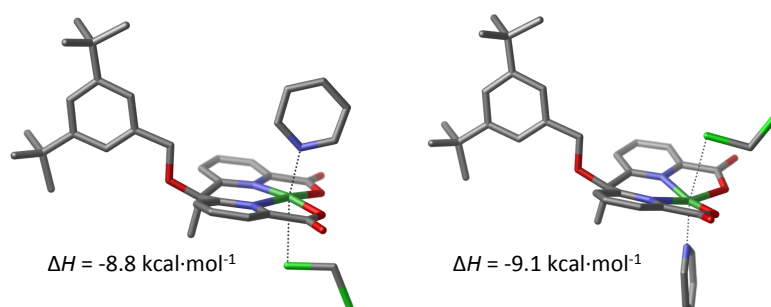

**Figure S6.** Optimized structures of pyridine-dichloromethane-adducts of complex **1d** in triplet state with the corresponding binding enthalpies for the dashed bonds.

**Table S4.** Absolute energies ( $E_{\text{elec}}$ ) and corrections to enthalpy ( $H_{\text{corr}}$ ) of dichloromethane and pyridine adducts in triplet state of the nickel dipyrldimethane complex **1d** and as well as the hereby calculated binding enthalpies relative to the square planar complex in singlet state and the unbound ligands ( $\Delta H$ ).

|                                                          | $E_{\text{elec}} / \text{Hartree}$ | $H_{\text{corr}} / \text{Hartree}$ | $\Delta H / \text{kcal}\cdot\text{mol}^{-1}$ |
|----------------------------------------------------------|------------------------------------|------------------------------------|----------------------------------------------|
| dcm                                                      | -959.77647823                      | 0.032880                           |                                              |
| <b>1d(dcm)</b>                                           |                                    |                                    |                                              |
| <sup>t</sup> Bu <sub>2</sub> BnO-side coordination       | -4078.86538323                     | 0.615357                           | +6.3                                         |
| <b>1d(dcm)</b>                                           |                                    |                                    |                                              |
| Me-side coordination                                     | -4078.86745288                     | 0.615357                           | +5.0                                         |
| <b>1d(dcm)<sub>2</sub></b>                               | -5038.65240375                     | 0.650401                           | +1.0                                         |
| <b>1d(py)(dcm)</b>                                       |                                    |                                    |                                              |
| <sup>t</sup> Bu <sub>2</sub> BnO-side coordination of py | -4327.26865255                     | 0.709400                           | -8.8                                         |
| <b>1d(py)(dcm)</b>                                       |                                    |                                    |                                              |
| Me-side coordination of py                               | -4327.26920133                     | 0.709464                           | -9.1                                         |



## S1.8 Dimers

Evans susceptibility measurements show that a solution of complex **1d** in DCM without any additional ligands is already slightly paramagnetic (see section S2). The reason for the observed paramagnetism is most probably the presence of dimers. In analogy to the solid state structure **1a**<sub>2</sub>(EtOH)<sub>3</sub> (see section S3.3), dimers where the nickel ion in one complex is coordinated by a carbonyl oxygen of a second complex have been calculated. These calculated structures with up to two ligands differ from the solid state structure where three ligands (solvent molecules) are bound to the nickel atoms and the coordinating complex is oriented perpendicular to the other. In contrast, in the calculations the complexes are almost parallel to each other (Figure S7). For the dimer with one singlet and one triplet nickel center without any additional ligands **1d**<sub>2</sub> (= <sup>1</sup>Ni<sup>3</sup>Ni), four isomers (depending upon the relative orientation of the two monomeric subunits) are possible. Of these, the one with the methyl groups pointing towards each other is the lowest in energy (Figure S7 top left) and was thus chosen as a starting point for the other structures.

**Table S5.** Absolute energies ( $E_{\text{elec}}$ ) and corrections to enthalpy ( $H_{\text{corr}}$ ) enthalpies for dimers potentially appearing in the pyridine titration of **1d** as well as the hereby calculated binding enthalpies relative to the square planar complex in singlet state and the non-coordinating ligands ( $\Delta H$ ). The complex is abbreviated with Ni, pyridine with py, and dichloromethane with dcm. The multiplicity of each nickel(II) ion is given as a superscript number.

|                                                 | $E_{\text{elec}} / \text{Hartree}$ | $H_{\text{corr}} / \text{Hartree}$ | $\Delta H / \text{kcal}\cdot\text{mol}^{-1}$ |
|-------------------------------------------------|------------------------------------|------------------------------------|----------------------------------------------|
| py                                              | -248.37686                         | 0.09170                            |                                              |
| dcm                                             | -959.77648                         | 0.03288                            |                                              |
| Ni                                              | -3119.09777                        | 0.58130                            | ±0.0                                         |
| <sup>1</sup> Ni <sup>3</sup> Ni                 | -6238.21371                        | 1.16387                            | -10.6                                        |
| <sup>1</sup> Ni <sup>3</sup> Ni(dcm)            | -7197.99693                        | 1.19901                            | -13.4                                        |
| <sup>1</sup> Ni <sup>3</sup> Ni(py)             | -6486.60745                        | 1.25794                            | -19.7                                        |
| <sup>3</sup> Ni <sub>2</sub>                    | -6238.21152                        | 1.16339                            | -9.5                                         |
| <sup>3</sup> Ni <sub>2</sub> (dcm)              | -7197.99343                        | 1.19831                            | -11.7                                        |
| <sup>3</sup> Ni <sub>2</sub> (dcm) <sub>2</sub> | -8157.77550                        | 1.23322                            | -13.9                                        |
| <sup>3</sup> Ni <sub>2</sub> (py)               | -6486.60529                        | 1.25733                            | -18.7                                        |
| <sup>3</sup> Ni <sub>2</sub> (py)(dcm)          | -7446.38767                        | 1.29224                            | -21.2                                        |
| <sup>3</sup> Ni <sub>2</sub> (py) <sub>2</sub>  | -6734.99774                        | 1.35104                            | -27.2                                        |
| <sup>3</sup> Ni <sub>2</sub> (py) <sub>3</sub>  | -6983.38768                        | 1.44566                            | -33.6                                        |

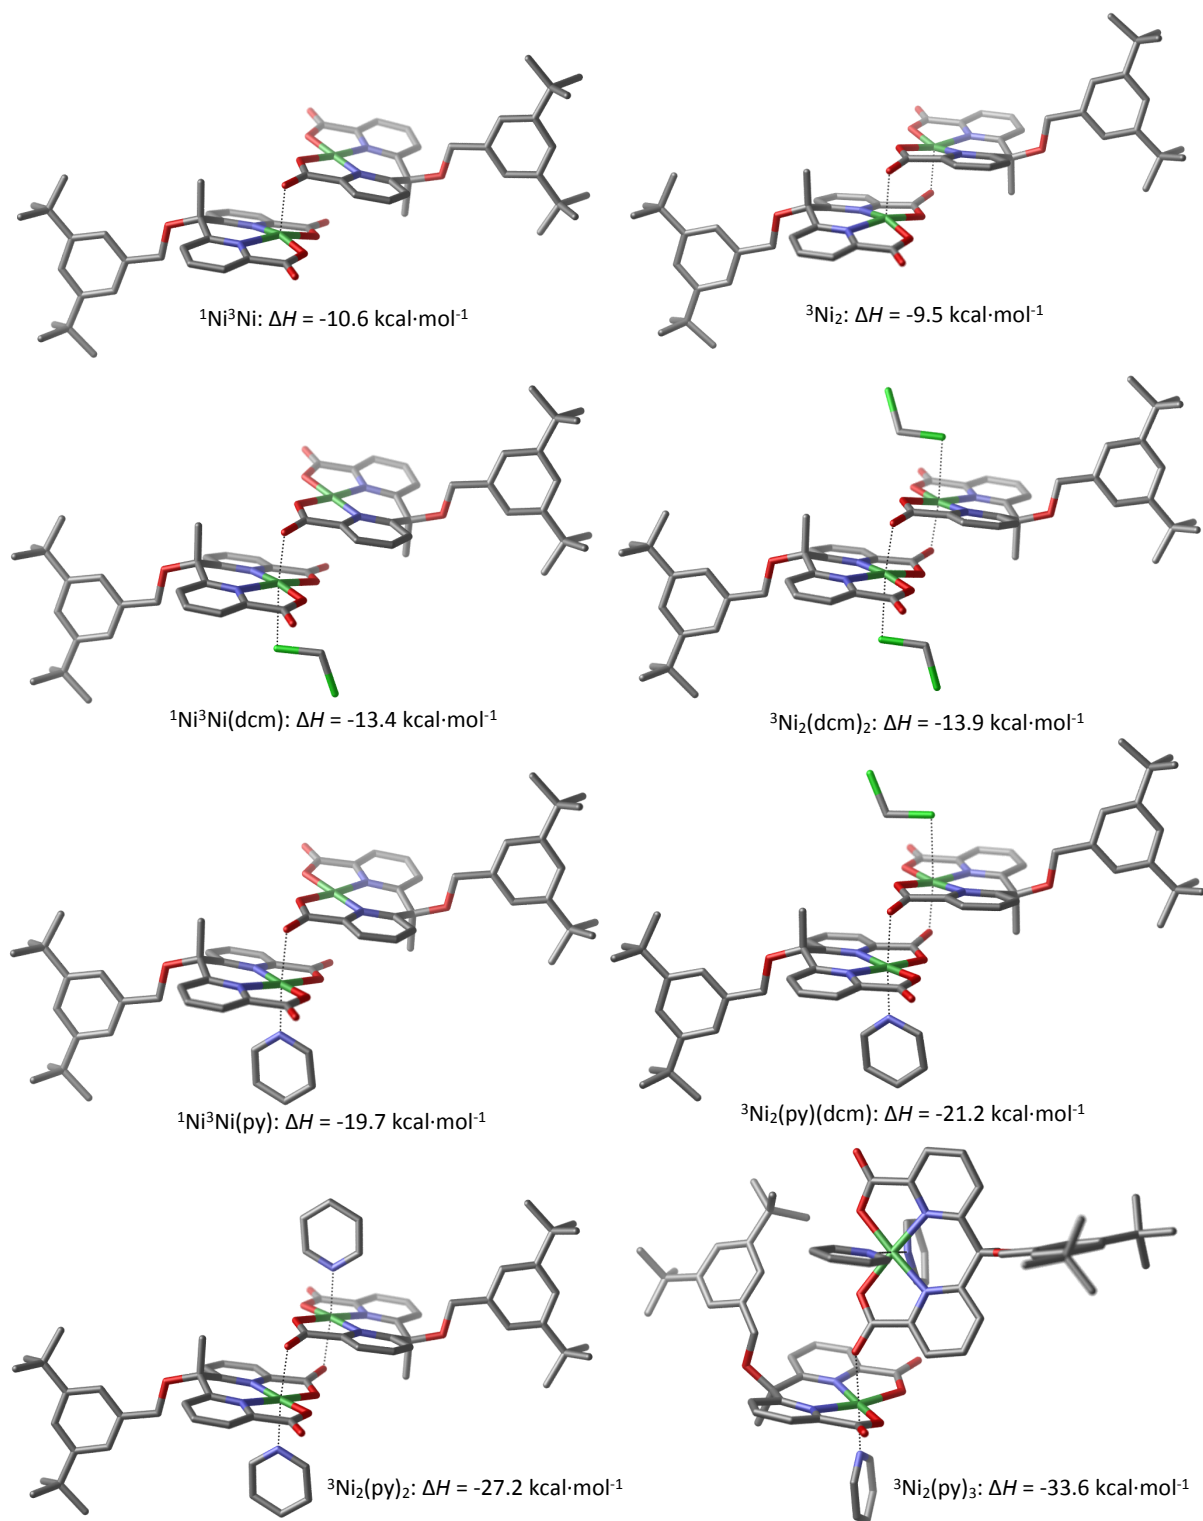

**Figure S7.** DFT-optimized structures of dimers of complex **1d** with the corresponding binding enthalpies for all dashed bonds. The two complexes on the top left can also exist in quintet states (not shown), which are slightly higher in energy.

### S1.9 Reaction Enthalpies

For the species Ni(py) and Ni(py)(dcm), where two isomers can exist, average values are considered.

**Table S6.** Calculated reaction enthalpies for selected association steps potentially taking place in the pyridine titration.

| Reaction                                                                                                         | $\Delta H / \text{kcal}\cdot\text{mol}^{-1}$ |
|------------------------------------------------------------------------------------------------------------------|----------------------------------------------|
| Ni + py $\rightarrow$ Ni(py)                                                                                     | -5.3                                         |
| Ni + py + dcm $\rightarrow$ Ni(py)(dcm)                                                                          | -8.9                                         |
| Ni(py) + py $\rightarrow$ Ni(py) <sub>2</sub>                                                                    | -7.6                                         |
| Ni(py)(dcm) + py $\rightarrow$ Ni(py) <sub>2</sub> + dcm                                                         | -3.9                                         |
| 2 Ni $\rightarrow$ <sup>1</sup> Ni <sup>3</sup> Ni                                                               | -10.6                                        |
| 2 Ni $\rightarrow$ <sup>3</sup> Ni <sub>2</sub>                                                                  | -9.5                                         |
| 2 Ni + dcm $\rightarrow$ <sup>1</sup> Ni <sup>3</sup> Ni(dcm)                                                    | -13.4                                        |
| 2 Ni + dcm $\rightarrow$ <sup>3</sup> Ni <sub>2</sub> (dcm)                                                      | -11.7                                        |
| 2 Ni + 2 dcm $\rightarrow$ <sup>3</sup> Ni <sub>2</sub> (dcm) <sub>2</sub>                                       | -13.9                                        |
| <sup>1</sup> Ni <sup>3</sup> Ni + py $\rightarrow$ <sup>1</sup> Ni <sup>3</sup> Ni(py)                           | -9.1                                         |
| <sup>3</sup> Ni <sub>2</sub> + py $\rightarrow$ <sup>3</sup> Ni <sub>2</sub> (py)                                | -9.2                                         |
| <sup>1</sup> Ni <sup>3</sup> Ni(dcm) + py $\rightarrow$ <sup>3</sup> Ni <sub>2</sub> (py)(dcm)                   | -7.8                                         |
| <sup>3</sup> Ni <sub>2</sub> (dcm) + py $\rightarrow$ <sup>3</sup> Ni <sub>2</sub> (py)(dcm)                     | -9.5                                         |
| <sup>3</sup> Ni <sub>2</sub> (dcm) <sub>2</sub> + py $\rightarrow$ <sup>3</sup> Ni <sub>2</sub> (py)(dcm) + dcm  | -7.3                                         |
| <sup>1</sup> Ni <sup>3</sup> Ni(py) + py $\rightarrow$ <sup>3</sup> Ni <sub>2</sub> (py) <sub>2</sub>            | -7.5                                         |
| <sup>3</sup> Ni <sub>2</sub> (py) + py $\rightarrow$ <sup>3</sup> Ni <sub>2</sub> (py) <sub>2</sub>              | -8.5                                         |
| <sup>3</sup> Ni <sub>2</sub> (py)(dcm) + py $\rightarrow$ <sup>3</sup> Ni <sub>2</sub> (py) <sub>2</sub> + dcm   | -6.1                                         |
| <sup>3</sup> Ni <sub>2</sub> (py) <sub>2</sub> + py $\rightarrow$ <sup>3</sup> Ni <sub>2</sub> (py) <sub>3</sub> | -6.4                                         |
| <sup>3</sup> Ni <sub>2</sub> (py) <sub>3</sub> + py $\rightarrow$ 2 Ni(py) <sub>2</sub>                          | +7.9                                         |
| <sup>3</sup> Ni <sub>2</sub> (py) + 3 py $\rightarrow$ 2Ni(py) <sub>2</sub>                                      | -7.0                                         |
| <sup>3</sup> Ni <sub>2</sub> (py)(dcm) + 3 py $\rightarrow$ 2Ni(py) <sub>2</sub> + dcm                           | -4.6                                         |

## S1.10 XYZ Atomic Coordinates of the PBE/def2-SVP Optimized Ligand and Complexes

### S1.10.1 Pyridine

|   |           |           |          |
|---|-----------|-----------|----------|
| C | -1.205650 | 0.676271  | 0.000000 |
| C | -1.147329 | -0.728028 | 0.000000 |
| C | 0.000002  | 1.393404  | 0.000000 |
| C | 1.205652  | 0.676268  | 0.000000 |
| C | 1.147327  | -0.728031 | 0.000000 |
| N | -0.000002 | -1.425803 | 0.000000 |
| H | -2.080780 | -1.320515 | 0.000000 |
| H | 0.000003  | 2.494678  | 0.000000 |
| H | -2.177144 | 1.193838  | 0.000000 |
| H | 2.080777  | -1.320519 | 0.000000 |
| H | 2.177148  | 1.193832  | 0.000000 |

### S1.10.2 Ethylenediamido-substituted nickel(II) dipyridylmethane A

| A  |           |           | A(py)     |    |           |           |           |
|----|-----------|-----------|-----------|----|-----------|-----------|-----------|
| C  | 1.175875  | 1.723351  | 0.082018  | C  | -1.392540 | 1.795424  | -0.442010 |
| C  | 1.590070  | -3.060103 | -0.085210 | C  | -2.580847 | 2.529651  | -0.244609 |
| C  | 0.636111  | -4.071931 | -0.266105 | C  | -3.818271 | 1.868877  | -0.325554 |
| C  | -0.728558 | -3.739561 | -0.262885 | C  | -3.862058 | 0.493244  | -0.616682 |
| C  | -1.086347 | -2.403902 | -0.094392 | C  | -2.651835 | -0.196644 | -0.739059 |
| C  | 2.232193  | -0.651646 | 0.447136  | C  | -0.052167 | 2.566038  | -0.642877 |
| C  | 1.914384  | 0.833562  | 0.143049  | C  | 1.318578  | 1.827505  | -0.547539 |
| N  | -0.142113 | -1.425215 | 0.069341  | N  | -1.465231 | 0.464542  | -0.633869 |
| N  | 0.640482  | 1.281532  | 0.095646  | N  | 1.414108  | 0.493404  | -0.694427 |
| C  | 2.980262  | 1.751620  | 0.054637  | C  | 2.499522  | 2.599342  | -0.472398 |
| C  | 2.715885  | 3.121060  | -0.090608 | C  | 3.743593  | 1.968287  | -0.626766 |
| C  | 1.383596  | 3.563092  | -0.136588 | C  | 3.803894  | 0.582267  | -0.861187 |
| C  | 0.366107  | 2.616772  | -0.036662 | C  | 2.607014  | -0.141125 | -0.864365 |
| C  | 2.454287  | -0.754775 | 1.974698  | C  | -0.117395 | 3.134784  | -2.081567 |
| O  | 3.488028  | -0.999060 | -0.140245 | O  | -0.032748 | 3.715212  | 0.209876  |
| C  | -2.527727 | -1.919336 | -0.054467 | C  | -2.555285 | -1.695931 | -1.083796 |
| C  | -1.111559 | 2.962179  | -0.129526 | C  | 2.555661  | -1.670796 | -1.066910 |
| N  | -2.522220 | -0.568230 | 0.065723  | N  | -1.300664 | -2.144854 | -0.850346 |
| O  | -3.495091 | -2.686783 | -0.120256 | O  | -3.537118 | -2.294769 | -1.550314 |
| N  | -1.835903 | 1.823502  | 0.018825  | N  | 1.291025  | -2.105757 | -0.882009 |
| O  | -1.518005 | 4.111068  | -0.339336 | O  | 3.583050  | -2.299394 | -1.365226 |
| H  | 2.756213  | -1.786153 | 2.240600  | H  | 4.742551  | 0.035297  | -1.033087 |
| H  | 1.518596  | -0.502239 | 2.509883  | H  | -1.028936 | 3.751516  | -2.201238 |
| Ni | -0.906919 | 0.261645  | 0.124498  | H  | -0.144010 | 2.308711  | -2.817808 |
| C  | 3.542038  | -0.973436 | -1.562712 | Ni | -0.008903 | -0.820087 | -0.337777 |
| H  | 3.251130  | -0.052637 | 2.287237  | N  | 0.046780  | -0.731244 | 1.687687  |
| H  | 2.665188  | -3.284816 | -0.054569 | C  | -1.093562 | -0.899808 | 2.394665  |
| H  | 4.008818  | 1.368864  | 0.109199  | C  | -1.100356 | -1.044689 | 3.786929  |
| H  | 4.577619  | -1.248222 | -1.840131 | C  | 0.119474  | -1.020471 | 4.479907  |
| H  | 3.316649  | 0.035122  | -1.975713 | C  | 1.302228  | -0.849953 | 3.744542  |
| H  | 2.841993  | -1.704258 | -2.026088 | C  | 1.222861  | -0.710061 | 2.354063  |
| C  | -3.690976 | 0.292094  | 0.213141  | H  | 2.285406  | -0.829645 | 4.237031  |
| C  | -3.267502 | 1.701437  | -0.248936 | C  | 0.040297  | 3.436883  | 1.599439  |
| H  | -4.005590 | 0.316316  | 1.282590  | H  | 0.771226  | 3.764417  | -2.280996 |
| H  | -4.553074 | -0.104306 | -0.365399 | H  | 0.007740  | 4.412892  | 2.121000  |
| H  | -3.843499 | 2.503985  | 0.260943  | H  | 0.986274  | 2.916753  | 1.876093  |
| H  | -3.453006 | 1.822563  | -1.341795 | H  | -0.815365 | 2.815385  | 1.950574  |
| H  | 0.959453  | -5.115511 | -0.398645 | H  | -2.027049 | -0.929980 | 1.811029  |
| H  | -1.537560 | -4.475223 | -0.383254 | H  | -2.056134 | -1.180789 | 4.313732  |
| H  | 3.548079  | 3.837442  | -0.164296 | H  | 0.148363  | -1.137161 | 5.573826  |
| H  | 1.092701  | 4.617468  | -0.254061 | C  | -0.744007 | -3.392833 | -1.351419 |
|    |           |           |           | C  | 0.776752  | -3.456480 | -0.983380 |
|    |           |           |           | H  | -0.871108 | -3.431744 | -2.459090 |
|    |           |           |           | H  | -1.275409 | -4.287720 | -0.953585 |
|    |           |           |           | H  | 1.344248  | -4.062713 | -1.724178 |
|    |           |           |           | H  | 0.895743  | -3.976046 | -0.001719 |
|    |           |           |           | H  | -4.799710 | -0.065322 | -0.752922 |
|    |           |           |           | H  | -2.522867 | 3.612869  | -0.064744 |
|    |           |           |           | H  | -4.750508 | 2.436898  | -0.182260 |
|    |           |           |           | H  | 2.424853  | 3.685360  | -0.317169 |
|    |           |           |           | H  | 4.667944  | 2.564693  | -0.578385 |
|    |           |           |           | H  | 2.129143  | -0.583323 | 1.741153  |

### S1.10.3 *trans*-Cyclohexylenediamido-substituted nickel(II) dipyriddylnmethane B

| B  |           |           | B(py)     |    |           |           |           |
|----|-----------|-----------|-----------|----|-----------|-----------|-----------|
| C  | 1.177445  | -1.721459 | 0.128694  | C  | 1.320944  | -1.803028 | 0.362115  |
| C  | 1.594351  | -3.064200 | 0.029372  | C  | 1.724976  | -3.157467 | 0.355381  |
| C  | 0.645840  | -4.083442 | -0.134447 | C  | 0.749596  | -4.163839 | 0.286895  |
| C  | -0.716707 | -3.749029 | -0.188685 | C  | -0.614197 | -3.819802 | 0.230356  |
| C  | -1.076796 | -2.408379 | -0.070651 | C  | -0.951870 | -2.463426 | 0.187077  |
| C  | 2.234960  | -0.637381 | 0.443818  | C  | 2.376351  | -0.704236 | 0.690540  |
| C  | 1.911902  | 0.832745  | 0.085444  | C  | 2.083187  | 0.798710  | 0.394834  |
| N  | -0.139747 | -1.422229 | 0.081369  | N  | 0.014402  | -1.507196 | 0.240705  |
| N  | 0.636760  | 1.281128  | 0.061210  | N  | 0.821371  | 1.258369  | 0.288731  |
| C  | 2.976740  | 1.745061  | -0.057330 | C  | 3.152345  | 1.717487  | 0.423477  |
| C  | 2.712531  | 3.113231  | -0.213168 | C  | 2.876057  | 3.095485  | 0.413264  |
| C  | 1.381356  | 3.559742  | -0.204254 | C  | 1.543976  | 3.542258  | 0.394183  |
| C  | 0.365248  | 2.616137  | -0.070516 | C  | 0.525532  | 2.587937  | 0.301000  |
| C  | 2.469697  | -0.676595 | 1.972542  | C  | 2.602263  | -0.791558 | 2.219731  |
| O  | 3.486755  | -1.007555 | -0.138941 | O  | 3.633427  | -1.066826 | 0.108778  |
| C  | -2.510729 | -1.919082 | -0.173269 | C  | -2.408630 | -1.971746 | 0.041972  |
| C  | -1.108896 | 2.982068  | -0.008919 | C  | -0.973860 | 2.939147  | 0.325751  |
| N  | -2.539910 | -0.579656 | 0.053615  | N  | -2.432018 | -0.619599 | -0.007085 |
| O  | -3.446365 | -2.680799 | -0.450551 | O  | -3.334435 | -2.796732 | -0.013963 |
| N  | -1.841581 | 1.839670  | -0.010226 | N  | -1.711128 | 1.901863  | -0.133797 |
| O  | -1.488846 | 4.159359  | 0.039644  | O  | -1.340957 | 4.035687  | 0.781382  |
| H  | 2.770067  | -1.696612 | 2.280725  | H  | 2.889345  | -1.823446 | 2.500644  |
| H  | 1.539665  | -0.397128 | 2.504218  | H  | 1.675213  | -0.517677 | 2.758966  |
| Ni | -0.916619 | 0.265156  | 0.101268  | Ni | -0.747575 | 0.226766  | -0.298691 |
| C  | 3.526181  | -1.049899 | -1.561409 | C  | 3.671144  | -1.058347 | -1.309857 |
| H  | 3.271655  | 0.035504  | 2.247010  | H  | 3.411323  | -0.098723 | 2.521457  |
| H  | 2.669112  | -3.284666 | 0.090166  | H  | 4.183905  | 1.342388  | 0.487177  |
| H  | 4.005232  | 1.359689  | -0.025001 | H  | 4.705972  | -1.322485 | -1.601434 |
| H  | 4.563110  | -1.322059 | -1.836423 | H  | 3.424845  | -0.057174 | -1.731699 |
| H  | 3.280554  | -0.066167 | -2.020349 | H  | 2.974296  | -1.805238 | -1.755511 |
| H  | 2.833196  | -1.813094 | -1.981144 | C  | -3.554408 | 0.268916  | -0.261831 |
| C  | -3.677207 | 0.292610  | -0.242911 | C  | -3.134722 | 1.724842  | 0.131878  |
| C  | -3.282563 | 1.714649  | 0.208302  | H  | -1.427575 | -4.559541 | 0.203139  |
| H  | 0.971636  | -5.131351 | -0.217562 | C  | -4.893387 | -0.075955 | 0.425513  |
| H  | -1.523122 | -4.484310 | -0.326969 | H  | -3.724747 | 0.276404  | -1.368846 |
| H  | 3.543958  | 3.825455  | -0.325733 | C  | -5.818105 | 1.167054  | 0.504754  |
| H  | 1.088854  | 4.616626  | -0.290851 | H  | -4.681521 | -0.459560 | 1.445455  |
| C  | -5.033741 | -0.095857 | 0.379282  | H  | -5.374560 | -0.912324 | -0.118621 |
| H  | -3.792655 | 0.321133  | -1.354349 | C  | -4.086187 | 2.729014  | -0.553063 |
| C  | -5.965145 | 1.142420  | 0.466813  | C  | -5.533859 | 2.177279  | -0.620529 |
| H  | -4.856838 | -0.515810 | 1.391659  | H  | -3.705508 | 2.934746  | -1.576726 |
| H  | -5.484675 | -0.911040 | -0.218853 | H  | -4.034632 | 3.689892  | -0.003104 |
| C  | -4.196390 | 2.749275  | -0.478448 | H  | -5.703394 | 1.675488  | -1.598233 |
| C  | -5.639831 | 2.192058  | -0.610846 | H  | -6.264239 | 3.011972  | -0.581106 |
| H  | -3.784286 | 2.987970  | -1.480747 | H  | -5.680885 | 1.678798  | 1.481712  |
| H  | -4.170494 | 3.695996  | 0.094576  | H  | -6.881393 | 0.850408  | 0.477885  |
| H  | -5.773661 | 1.725789  | -1.610976 | H  | -3.279632 | 1.815617  | 1.236670  |
| H  | -6.371148 | 3.025172  | -0.567328 | N  | -0.259092 | 0.134756  | -2.274433 |
| H  | -5.869293 | 1.617870  | 1.466985  | C  | -0.103256 | -1.029548 | -2.942786 |
| H  | -7.025110 | 0.825148  | 0.385091  | C  | 0.095299  | -1.084176 | -4.327592 |
| H  | -3.45645  | 1.766039  | 1.311364  | C  | 0.137713  | 0.114136  | -5.055929 |
|    |           |           |           | C  | -0.026052 | 1.322420  | -4.361870 |
|    |           |           |           | C  | -0.226005 | 1.291029  | -2.976826 |
|    |           |           |           | H  | -0.007407 | 2.290027  | -4.884395 |
|    |           |           |           | H  | -0.391532 | 2.208886  | -2.392163 |
|    |           |           |           | H  | -0.147879 | -1.950255 | -2.340430 |
|    |           |           |           | H  | 0.290229  | 0.105873  | -6.145810 |
|    |           |           |           | H  | 0.209444  | -2.060139 | -4.821698 |
|    |           |           |           | H  | 1.055948  | -5.221521 | 0.288368  |
|    |           |           |           | H  | 2.795094  | -3.400451 | 0.423324  |
|    |           |           |           | H  | 3.705716  | 3.818689  | 0.443765  |
|    |           |           |           | H  | 1.263185  | 4.604096  | 0.451265  |

### S1.10.4 Phenylenediamido-substituted nickel(II) dipyridylmethane C

| C |           |           |           | C(py) |           |           |           |
|---|-----------|-----------|-----------|-------|-----------|-----------|-----------|
| C | -2.217922 | 1.329398  | 0.103174  | C     | -2.213383 | -1.356231 | -0.772545 |
| C | -2.990032 | 2.504957  | -0.018356 | C     | -2.983947 | -2.539215 | -0.759346 |
| C | -2.356857 | 3.745440  | -0.163095 | C     | -2.334289 | -3.783489 | -0.719936 |
| C | -0.953075 | 3.805221  | -0.169583 | C     | -0.928712 | -3.840689 | -0.703818 |
| C | -0.237414 | 2.615703  | -0.046131 | C     | -0.216507 | -2.637297 | -0.669021 |
| C | -2.940980 | 0.000057  | 0.424396  | C     | -2.923511 | 0.000099  | -1.069856 |
| C | -2.217940 | -1.329357 | 0.103378  | C     | -2.213420 | 1.356412  | -0.772357 |
| N | -0.870491 | 1.408165  | 0.078937  | N     | -0.872683 | -1.441820 | -0.691478 |
| N | -0.870517 | -1.408137 | 0.078908  | N     | -0.872727 | 1.441998  | -0.691232 |
| C | -2.990084 | -2.504932 | -0.017842 | C     | -2.984007 | 2.539388  | -0.759024 |
| C | -2.356947 | -3.745450 | -0.162427 | C     | -2.334358 | 3.783657  | -0.719375 |
| C | -0.953165 | -3.805218 | -0.169377 | C     | -0.928782 | 3.840873  | -0.703178 |
| C | -0.237473 | -2.615695 | -0.046186 | C     | -0.216571 | 2.637475  | -0.668603 |
| C | -3.211976 | 0.000202  | 1.948269  | C     | -3.199416 | 0.000185  | -2.593190 |
| O | -4.232625 | -0.000003 | -0.186498 | O     | -4.216675 | 0.000038  | -0.456509 |
| C | 1.278190  | 2.560611  | -0.049926 | C     | 1.320302  | -2.580083 | -0.641865 |
| C | 1.278128  | -2.560616 | -0.050250 | C     | 1.320230  | 2.580259  | -0.641511 |
| N | 1.669895  | 1.255138  | 0.036232  | N     | 1.731876  | -1.289589 | -0.471184 |
| O | 1.974059  | 3.578823  | -0.132092 | O     | 1.988955  | -3.612973 | -0.786175 |
| N | 1.669865  | -1.255164 | 0.036080  | N     | 1.731778  | 1.289694  | -0.471329 |
| O | 1.973975  | -3.578828 | -0.132624 | O     | 1.988884  | 3.613190  | -0.785464 |
| H | -3.791395 | 0.901558  | 2.226524  | H     | -0.362976 | 4.783911  | -0.714124 |
| H | -2.254430 | 0.000236  | 2.503863  | H     | -3.779344 | -0.900729 | -2.872437 |
| N | 0.335225  | -0.000002 | 0.108199  | H     | -2.244133 | 0.000220  | -3.152420 |
| C | -4.249703 | -0.000103 | -1.610394 | Ni    | 0.333937  | 0.000040  | -0.167188 |
| H | -3.791416 | -0.901093 | 2.226682  | N     | -0.059241 | -0.000291 | 1.841774  |
| H | -4.084857 | 2.418811  | 0.014324  | C     | -0.087894 | -1.161030 | 2.534573  |
| H | -4.084900 | -2.418753 | 0.014958  | C     | -0.148567 | -1.205318 | 3.932238  |
| H | -5.315213 | -0.000878 | -1.909367 | C     | -0.178429 | -0.000559 | 4.650425  |
| H | -3.757244 | -0.901868 | -2.038514 | C     | -0.148884 | 1.204340  | 3.932457  |
| H | -3.758524 | 0.902305  | -2.038631 | C     | -0.088212 | 1.160315  | 2.534783  |
| C | 2.965408  | 0.716127  | 0.005324  | H     | -0.166037 | 2.177420  | 4.444704  |
| C | 2.965391  | -0.716178 | 0.005214  | C     | -4.215627 | -0.000163 | 0.963443  |
| H | -2.957420 | 4.662405  | -0.261507 | H     | -3.779349 | 0.901123  | -2.872355 |
| H | -0.381047 | 4.739425  | -0.268030 | H     | -5.276057 | -0.000009 | 1.281229  |
| H | -2.957537 | -4.662359 | -0.261195 | H     | -3.716141 | 0.902105  | 1.385101  |
| H | -0.381162 | -4.739424 | -0.267960 | H     | -3.716468 | -0.902735 | 1.384834  |
| C | 4.179791  | 1.425763  | -0.033276 | H     | -0.054812 | -2.087027 | 1.938944  |
| C | 4.179756  | -1.425840 | -0.033491 | H     | -0.165470 | -2.178497 | 4.444305  |
| C | 5.385407  | -0.703131 | -0.068073 | H     | -0.219720 | -0.000663 | 5.750126  |
| C | 5.385424  | 0.703030  | -0.067967 | C     | 3.000841  | -0.727555 | -0.506095 |
| H | 4.155435  | 2.523069  | -0.039134 | C     | 3.000802  | 0.727745  | -0.506111 |
| H | 6.339989  | 1.250722  | -0.096774 | H     | -0.362884 | -4.783714 | -0.714988 |
| H | 6.339958  | -1.250843 | -0.096965 | H     | -4.080099 | -2.467618 | -0.805591 |
| H | 4.155370  | -2.523144 | -0.039519 | H     | -2.928167 | -4.710445 | -0.717319 |
|   |           |           |           | H     | -4.080151 | 2.467776  | -0.805343 |
|   |           |           |           | H     | -2.928240 | 4.710610  | -0.716565 |
|   |           |           |           | H     | -0.055389 | 2.086436  | 1.939328  |
|   |           |           |           | C     | 4.227895  | -1.423785 | -0.571604 |
|   |           |           |           | C     | 5.430268  | -0.704810 | -0.630166 |
|   |           |           |           | C     | 5.430230  | 0.705124  | -0.630159 |
|   |           |           |           | C     | 4.227817  | 1.424037  | -0.571605 |
|   |           |           |           | H     | 4.204862  | -2.522012 | -0.587198 |
|   |           |           |           | H     | 6.385000  | 1.251433  | -0.681879 |
|   |           |           |           | H     | 6.385071  | -1.251062 | -0.681885 |
|   |           |           |           | H     | 4.204748  | 2.522263  | -0.587191 |

S1.10.5 4,5-Difluorophenylenediamido-substituted nickel(II) dipyridylmethane D

| D  |           |           | D(py)     |    |            |           |           |
|----|-----------|-----------|-----------|----|------------|-----------|-----------|
| C  | 2.653119  | -1.330053 | 0.099821  | C  | -8.532559  | -5.643166 | -0.738748 |
| C  | 3.424956  | -2.505624 | -0.024593 | C  | -9.304509  | -6.823967 | -0.680443 |
| C  | 2.791353  | -3.746442 | -0.164333 | C  | -8.653324  | -8.066030 | -0.608288 |
| C  | 1.387620  | -3.807270 | -0.163704 | C  | -7.247636  | -8.126298 | -0.625445 |
| C  | 0.672047  | -2.617889 | -0.038018 | C  | -6.533149  | -6.925160 | -0.654474 |
| C  | 3.378120  | -0.000048 | 0.415406  | C  | -9.222752  | -4.290702 | -1.102531 |
| C  | 2.653136  | 1.329996  | 0.099939  | C  | -8.535777  | -2.930178 | -0.763850 |
| N  | 1.305956  | -1.409884 | 0.082559  | N  | -7.190322  | -5.731487 | -0.683878 |
| N  | 1.305975  | 1.409842  | 0.082615  | N  | -7.193736  | -2.837723 | -0.711812 |
| C  | 3.424995  | 2.505565  | -0.024366 | C  | -9.310463  | -1.750342 | -0.726467 |
| C  | 2.791414  | 3.746396  | -0.164076 | C  | -8.662118  | -0.505626 | -0.678221 |
| C  | 1.387681  | 3.807241  | -0.163510 | C  | -7.256601  | -0.442395 | -0.698158 |
| C  | 0.672087  | 2.617863  | -0.037933 | C  | -6.539320  | -1.642199 | -0.705327 |
| C  | 3.660334  | -0.000121 | 1.937360  | C  | -9.363862  | -4.304971 | -2.644473 |
| O  | 4.664683  | -0.000001 | -0.204976 | O  | -10.567329 | -4.287661 | -0.612449 |
| C  | -0.843034 | -2.561902 | -0.035148 | C  | -4.996366  | -6.870547 | -0.726283 |
| C  | -0.842995 | 2.561874  | -0.035379 | C  | -5.002465  | -1.694684 | -0.777203 |
| N  | -1.231482 | -1.255642 | 0.052147  | N  | -4.576557  | -5.572956 | -0.664565 |
| O  | -1.545947 | -3.575311 | -0.114745 | O  | -4.332607  | -7.907390 | -0.856884 |
| N  | -1.231463 | 1.255628  | 0.052035  | N  | -4.579640  | -2.989870 | -0.690497 |
| O  | -1.545896 | 3.575329  | -0.114495 | O  | -4.341124  | -0.659060 | -0.928160 |
| H  | 4.242027  | -0.901344 | 2.211191  | H  | -6.697140  | 0.504224  | -0.715903 |
| H  | 2.707310  | -0.000126 | 2.500658  | H  | -9.916068  | -5.210341 | -2.962891 |
| Ni | 0.102571  | -0.000014 | 0.117812  | H  | -8.362862  | -4.307498 | -3.116607 |
| C  | 4.671340  | 0.000143  | -1.629172 | Ni | -5.953879  | -4.279139 | -0.282800 |
| H  | 4.242065  | 0.901053  | 2.211271  | N  | -6.070022  | -4.259287 | 1.748738  |
| H  | 4.519920  | -2.419264 | 0.001873  | C  | -4.890208  | -4.247992 | 2.411422  |
| H  | 4.519956  | 2.419187  | 0.002135  | C  | -4.815593  | -4.233529 | 3.808640  |
| H  | 5.734615  | 0.000644  | -1.935793 | C  | -6.002786  | -4.230624 | 4.556491  |
| H  | 4.176089  | 0.902129  | -2.053543 | C  | -7.224980  | -4.242497 | 3.868203  |
| H  | 4.176886  | -0.902194 | -2.053725 | C  | -7.212119  | -4.256741 | 2.468401  |
| C  | -2.523578 | -0.715859 | 0.024413  | H  | -8.184884  | -4.240925 | 4.405296  |
| C  | -2.523568 | 0.715864  | 0.024362  | C  | -10.720983 | -4.275367 | 0.796100  |
| H  | 3.391735  | -4.663245 | -0.265002 | H  | -9.919065  | -3.407269 | -2.978973 |
| H  | 0.816589  | -4.742464 | -0.258378 | H  | -11.809782 | -4.273059 | 0.996712  |
| H  | 3.391812  | 4.663198  | -0.264664 | H  | -10.275819 | -3.366475 | 1.262922  |
| H  | 0.816666  | 4.742440  | -0.258221 | H  | -10.276814 | -5.176544 | 1.278583  |
| C  | -3.736839 | -1.428105 | -0.013180 | C  | -3.318505  | -5.010328 | -0.795331 |
| C  | -3.736817 | 1.428126  | -0.013309 | C  | -3.320259  | -3.552030 | -0.810199 |
| C  | -4.934033 | 0.705021  | -0.046404 | H  | -6.685890  | -9.071729 | -0.624713 |
| C  | -4.934044 | -0.704984 | -0.046335 | H  | -10.400785 | -6.756461 | -0.726599 |
| H  | -3.739843 | -2.525216 | -0.021072 | H  | -9.247360  | -8.991791 | -0.563687 |
| F  | -6.112144 | -1.352397 | -0.080618 | H  | -10.406610 | -1.821266 | -0.770434 |
| F  | -6.112123 | 1.352449  | -0.080750 | H  | -9.258305  | 0.419406  | -0.650292 |
| H  | -3.739804 | 2.525236  | -0.021322 | H  | -8.150494  | -4.266644 | 1.893268  |
|    |           |           |           | C  | -2.096960  | -5.708427 | -0.931934 |
|    |           |           |           | C  | -0.911457  | -4.987950 | -1.079195 |
|    |           |           |           | C  | -0.913167  | -3.574397 | -1.093801 |
|    |           |           |           | C  | -2.100412  | -2.853922 | -0.961297 |
|    |           |           |           | H  | -2.091981  | -6.806527 | -0.934408 |
|    |           |           |           | H  | -2.098079  | -1.756091 | -0.986319 |
|    |           |           |           | F  | 0.259888   | -2.931589 | -1.239486 |
|    |           |           |           | F  | 0.263160   | -5.630782 | -1.211552 |
|    |           |           |           | H  | -3.981500  | -4.250709 | 1.787979  |
|    |           |           |           | H  | -3.830609  | -4.224655 | 4.297522  |
|    |           |           |           | H  | -5.975747  | -4.219300 | 5.656549  |



### S1.10.6 Propylenediamido-substituted nickel(II) dipyridylmethane E

| E  |           |           | E(py)     |    |           |           |           |
|----|-----------|-----------|-----------|----|-----------|-----------|-----------|
| C  | 1.759376  | -1.311018 | 0.132850  | C  | 1.980500  | 1.346081  | -0.485212 |
| C  | 2.563151  | -2.464108 | 0.025705  | C  | 2.771545  | 2.505706  | -0.326092 |
| C  | 1.982170  | -3.711916 | -0.229029 | C  | 2.167961  | 3.769206  | -0.378125 |
| C  | 0.588715  | -3.787819 | -0.343521 | C  | 0.785584  | 3.858506  | -0.594648 |
| C  | -0.154890 | -2.616848 | -0.204192 | C  | 0.051126  | 2.671820  | -0.699128 |
| C  | 2.444326  | 0.000131  | 0.549271  | C  | 2.725210  | -0.000944 | -0.668503 |
| C  | 1.759297  | 1.311163  | 0.132568  | C  | 1.979325  | -1.347393 | -0.485767 |
| N  | 0.412520  | -1.394895 | 0.014227  | N  | 0.645413  | 1.450318  | -0.634327 |
| N  | 0.412385  | 1.394998  | 0.014367  | N  | 0.644154  | -1.450470 | -0.635078 |
| C  | 2.562995  | 2.464258  | 0.025020  | C  | 2.769388  | -2.507725 | -0.326964 |
| C  | 1.981882  | 3.712052  | -0.229505 | C  | 2.164753  | -3.770709 | -0.379368 |
| C  | 0.588379  | 3.787939  | -0.343371 | C  | 0.782295  | -3.858785 | -0.595860 |
| C  | -0.155134 | 2.616929  | -0.203833 | C  | 0.048845  | -2.671450 | -0.700054 |
| C  | 2.527973  | 0.000348  | 2.093649  | C  | 3.245654  | -0.000877 | -2.126940 |
| O  | 3.803349  | 0.000105  | 0.099631  | O  | 3.904270  | -0.001619 | 0.146836  |
| C  | -1.651897 | -2.625820 | -0.242033 | C  | -1.461612 | 2.704071  | -0.882973 |
| C  | -1.652149 | 2.625795  | -0.241673 | C  | -1.463960 | -2.702410 | -0.883699 |
| N  | -2.144921 | -1.376098 | -0.031530 | N  | -1.995966 | 1.463802  | -0.807184 |
| O  | -2.296527 | -3.671461 | -0.411137 | O  | -2.035649 | 3.793069  | -1.067354 |
| N  | -2.145051 | 1.375952  | -0.031578 | N  | -1.997282 | -1.461759 | -0.807273 |
| O  | -2.296822 | 3.671426  | -0.410658 | O  | -2.038887 | -3.790883 | -1.068454 |
| H  | 0.029672  | 4.718256  | -0.522548 | H  | 0.231376  | -4.806540 | -0.682960 |
| H  | 3.068563  | -0.901640 | 2.439789  | H  | 3.863123  | 0.900132  | -2.307337 |
| H  | 1.508428  | 0.000506  | 2.525144  | H  | 2.394943  | -0.000371 | -2.835099 |
| Ni | -0.878955 | -0.000015 | 0.041820  | Ni | -0.762158 | 0.000512  | -0.404985 |
| C  | 4.008968  | -0.000161 | -1.309742 | N  | -0.759882 | -0.000346 | 1.637439  |
| H  | 3.068736  | 0.902329  | 2.439534  | C  | -0.839346 | 1.160725  | 2.324922  |
| H  | 5.105295  | 0.000026  | -1.462030 | C  | -0.993248 | 1.204019  | 3.715847  |
| H  | 3.580277  | 0.901043  | -1.801718 | C  | -1.072176 | -0.000720 | 4.429940  |
| H  | 3.580647  | -0.901753 | -1.801326 | C  | -0.994055 | -1.205264 | 3.715449  |
| C  | -3.592936 | -1.260999 | 0.016783  | C  | -0.840123 | -1.161573 | 2.324531  |
| C  | -3.593039 | 1.260344  | 0.015799  | H  | -1.056461 | -2.178745 | 4.223370  |
| H  | 0.030103  | -4.718147 | -0.522947 | C  | 3.675782  | -0.001771 | 1.548396  |
| H  | 3.647176  | -2.353621 | 0.162892  | H  | 3.862319  | -0.902371 | -2.307660 |
| H  | 2.610935  | -4.610265 | -0.321688 | H  | 4.671994  | -0.002190 | 2.031247  |
| H  | 3.647075  | 2.353811  | 0.161780  | H  | 3.115860  | -0.904288 | 1.884831  |
| H  | 2.610602  | 4.610401  | -0.322481 | H  | 3.116486  | 0.901031  | 1.885100  |
| C  | -4.045540 | -0.000071 | 0.739672  | H  | -0.786157 | 2.085479  | 1.730547  |
| H  | -3.996236 | -2.172616 | 0.508758  | H  | -1.055001 | 2.177347  | 4.224147  |
| H  | -4.015772 | -1.267372 | -1.017484 | H  | -1.197341 | -0.000845 | 5.523358  |
| H  | -3.653591 | 0.000415  | 1.780405  | C  | -3.429949 | 1.302605  | -0.945417 |
| H  | -5.153427 | -0.000145 | 0.807574  | C  | -3.431105 | -1.299221 | -0.945320 |
| H  | -4.015143 | 1.265458  | -1.018783 | H  | 0.235501  | 4.806763  | -0.681557 |
| H  | -3.997006 | 2.172296  | 0.506577  | H  | 3.856295  | 2.394673  | -0.189049 |
|    |           |           |           | H  | 2.779622  | 4.677525  | -0.263417 |
|    |           |           |           | H  | 3.854228  | -2.397652 | -0.189868 |
|    |           |           |           | H  | 2.775671  | -4.679568 | -0.264972 |
|    |           |           |           | H  | -0.787650 | -2.086144 | 1.729806  |
|    |           |           |           | C  | -3.812191 | 0.001837  | -1.668229 |
|    |           |           |           | H  | -3.846539 | 2.184174  | -1.482202 |
|    |           |           |           | H  | -3.913605 | 1.308488  | 0.063846  |
|    |           |           |           | H  | -3.351537 | 0.001587  | -2.680363 |
|    |           |           |           | H  | -4.913608 | 0.002336  | -1.818232 |
|    |           |           |           | H  | -3.914610 | -1.304474 | 0.064019  |
|    |           |           |           | H  | -3.848628 | -2.180446 | -1.481945 |

### S1.10.7 1,8-Naphthalenediamido-substituted nickel(II) dipyridylmethane F

| F  |           |           | F(py)     |    |           |           |           |
|----|-----------|-----------|-----------|----|-----------|-----------|-----------|
| C  | 1.699675  | -1.316146 | 0.032042  | C  | 1.859447  | -1.355269 | 0.098480  |
| C  | 2.496249  | -2.443571 | -0.247428 | C  | 2.641626  | -2.493746 | -0.188140 |
| C  | 1.906545  | -3.626202 | -0.714529 | C  | 2.010092  | -3.731229 | -0.381684 |
| C  | 0.514407  | -3.676452 | -0.844370 | C  | 0.618691  | -3.819713 | -0.252979 |
| C  | -0.225232 | -2.541381 | -0.506495 | C  | -0.100663 | -2.648451 | 0.023881  |
| C  | 2.359325  | -0.073132 | 0.645162  | C  | 2.572208  | -0.057253 | 0.538188  |
| C  | 1.704983  | 1.267453  | 0.281280  | C  | 1.865836  | 1.302989  | 0.316362  |
| N  | 0.354401  | -1.376672 | -0.103668 | N  | 0.517381  | -1.452036 | 0.172562  |
| N  | 0.379395  | 1.351518  | 0.016929  | N  | 0.523112  | 1.403492  | 0.234212  |
| C  | 2.501294  | 2.427674  | 0.322068  | C  | 2.667871  | 2.463428  | 0.348909  |
| C  | 1.939638  | 3.678789  | 0.032466  | C  | 2.059578  | 3.725812  | 0.312285  |
| C  | 0.578605  | 3.745570  | -0.279120 | C  | 0.664137  | 3.809597  | 0.260833  |
| C  | -0.169533 | 2.564416  | -0.256403 | C  | -0.077395 | 2.619568  | 0.222574  |
| C  | 2.306027  | -0.229109 | 2.181663  | C  | 2.801137  | -0.191813 | 2.062551  |
| O  | 3.750803  | -0.044086 | 0.317650  | O  | 3.888379  | -0.010408 | -0.028651 |
| C  | -1.718810 | -2.572730 | -0.432377 | C  | -1.602941 | -2.704039 | 0.232568  |
| C  | -1.643110 | 2.587398  | -0.495450 | C  | -1.593264 | 2.686360  | 0.176707  |
| N  | -2.201949 | -1.369593 | 0.038611  | N  | -2.167075 | -1.463239 | 0.399205  |
| O  | -2.338784 | -3.606523 | -0.704584 | O  | -2.129411 | -3.830913 | 0.244471  |
| N  | -2.233071 | 1.371890  | -0.200809 | N  | -2.191122 | 1.451830  | 0.176390  |
| O  | -2.162304 | 3.653300  | -0.859827 | O  | -2.101476 | 3.822522  | 0.168097  |
| H  | 0.044132  | 4.673786  | -0.526438 | H  | 0.104666  | 4.755490  | 0.250902  |
| H  | 2.820594  | -1.163121 | 2.479317  | H  | 3.374700  | -1.115461 | 2.272186  |
| H  | 1.252674  | -0.269864 | 2.519729  | H  | 1.829135  | -0.243300 | 2.589260  |
| Ni | -0.935864 | -0.003087 | 0.014534  | Ni | -0.896653 | -0.017443 | -0.024839 |
| C  | 4.094780  | 0.126723  | -1.055169 | C  | 3.962035  | 0.145648  | -1.437209 |
| H  | 2.809720  | 0.631695  | 2.662205  | H  | 3.370157  | 0.680851  | 2.437397  |
| H  | 5.197013  | 0.040553  | -1.107993 | H  | 5.037365  | 0.131353  | -1.700159 |
| H  | 3.796639  | 1.123383  | -1.448564 | H  | 3.529369  | 1.113799  | -1.779317 |
| H  | 3.644159  | -0.652478 | -1.708616 | H  | 3.454426  | -0.681779 | -1.983783 |
| C  | -3.525988 | -1.246081 | 0.482329  | C  | -3.531819 | -1.286080 | 0.681821  |
| C  | -3.633772 | 1.243409  | -0.092455 | C  | -3.582329 | 1.277388  | 0.110626  |
| H  | -0.045789 | -4.566790 | -1.164904 | H  | 0.052776  | -4.757388 | -0.345009 |
| H  | 3.577794  | -2.373597 | -0.072449 | H  | 3.735383  | -2.397853 | -0.221871 |
| H  | 2.530087  | -4.501838 | -0.949883 | H  | 2.610126  | -4.625850 | -0.609257 |
| H  | 3.562275  | 2.321173  | 0.584953  | H  | 3.758934  | 2.354239  | 0.419697  |
| H  | 2.561737  | 4.586194  | 0.054336  | H  | 2.676855  | 4.637120  | 0.337063  |
| C  | -4.234842 | 0.002143  | 0.360899  | C  | -4.205244 | -0.007201 | 0.448153  |
| C  | -4.492616 | 2.336117  | -0.351031 | C  | -4.411299 | 2.363551  | -0.250342 |
| C  | -5.874070 | 2.288732  | -0.075494 | C  | -5.815703 | 2.290838  | -0.220424 |
| C  | -6.443163 | 1.158688  | 0.479565  | C  | -6.431834 | 1.135878  | 0.220481  |
| C  | -5.645242 | 0.001174  | 0.702490  | C  | -5.658164 | -0.009364 | 0.569060  |
| C  | -6.256815 | -1.161763 | 1.250692  | C  | -6.360471 | -1.153631 | 1.045350  |
| C  | -5.520688 | -2.318568 | 1.441800  | C  | -5.673518 | -2.301622 | 1.390426  |
| C  | -4.172677 | -2.365091 | 1.041771  | C  | -4.283956 | -2.370176 | 1.186904  |
| H  | -3.620085 | -3.307176 | 1.124927  | H  | -3.758906 | -3.311490 | 1.373784  |
| H  | -5.986078 | -3.216809 | 1.875790  | H  | -6.205090 | -3.180877 | 1.786593  |
| H  | -7.325626 | -1.118110 | 1.510528  | H  | -7.456130 | -1.093292 | 1.134816  |
| H  | -7.512286 | 1.121582  | 0.739286  | H  | -7.527051 | 1.072220  | 0.314442  |
| H  | -6.486396 | 3.178719  | -0.288703 | H  | -6.408590 | 3.172623  | -0.509790 |
| H  | -4.053172 | 3.253279  | -0.750323 | H  | -3.923429 | 3.309559  | -0.503779 |
|    |           |           |           | N  | -0.924112 | -0.079049 | -2.061422 |
|    |           |           |           | C  | 0.157743  | 0.140760  | -2.837193 |
|    |           |           |           | C  | 0.096523  | 0.136651  | -4.235575 |
|    |           |           |           | C  | -1.137444 | -0.104524 | -4.857469 |
|    |           |           |           | C  | -2.261084 | -0.330998 | -4.049643 |
|    |           |           |           | C  | -2.115602 | -0.310678 | -2.657394 |
|    |           |           |           | H  | -2.972493 | -0.480542 | -1.987461 |
|    |           |           |           | H  | -3.252155 | -0.522993 | -4.485372 |
|    |           |           |           | H  | -1.221735 | -0.114364 | -5.954739 |
|    |           |           |           | H  | 1.007945  | 0.322402  | -4.822455 |
|    |           |           |           | H  | 1.105345  | 0.329151  | -2.309622 |

### S1.10.8 Bis(amido)-substituted nickel(II) dipyridylmethane G

| G  |           |           | G(py)     |    |            |           |           |
|----|-----------|-----------|-----------|----|------------|-----------|-----------|
| C  | -0.683501 | 1.033195  | 0.560844  | C  | -1.211560  | 1.786368  | 0.146497  |
| C  | 0.475393  | 1.825051  | 0.429866  | C  | -2.305203  | 2.525768  | 0.649352  |
| C  | 1.726863  | 1.224248  | 0.246844  | C  | -3.612954  | 2.094808  | 0.393436  |
| C  | 1.802320  | -0.175216 | 0.221855  | C  | -3.808569  | 0.937312  | -0.370401 |
| C  | 0.626417  | -0.906600 | 0.366868  | C  | -2.682962  | 0.227585  | -0.802422 |
| C  | -2.002816 | 1.744398  | 0.915655  | C  | 0.184160   | 2.448208  | 0.246324  |
| C  | -3.322145 | 1.032959  | 0.561388  | C  | 1.473731   | 1.604112  | 0.100107  |
| N  | -0.597165 | -0.317645 | 0.520272  | N  | -1.415875  | 0.640918  | -0.535041 |
| N  | -3.408308 | -0.317915 | 0.521336  | N  | 1.496423   | 0.424057  | -0.552002 |
| C  | -4.481206 | 1.824598  | 0.430647  | C  | 2.675060   | 2.202624  | 0.541683  |
| C  | -5.732689 | 1.223541  | 0.248508  | C  | 3.902464   | 1.589660  | 0.261601  |
| C  | -5.807970 | -0.175940 | 0.224151  | C  | 3.911738   | 0.392306  | -0.465083 |
| C  | -4.631881 | -0.907102 | 0.368804  | C  | 2.686188   | -0.166831 | -0.842536 |
| C  | -2.002564 | 1.950699  | 2.449214  | C  | 0.232861   | 3.499171  | -0.890023 |
| O  | -2.003032 | 3.062509  | 0.358827  | O  | 0.257605   | 3.208860  | 1.460334  |
| C  | 0.610039  | -2.416541 | 0.383558  | C  | -2.844759  | -1.068380 | -1.592404 |
| C  | -4.615188 | -2.417040 | 0.385389  | C  | 2.645992   | -1.490455 | -1.601384 |
| N  | -0.664336 | -2.844008 | 0.540046  | N  | -1.656927  | -1.672180 | -1.785906 |
| O  | 1.641313  | -3.089531 | 0.273702  | O  | -3.981728  | -1.426933 | -1.946639 |
| N  | -3.340637 | -2.844264 | 0.541104  | N  | 1.380449   | -1.916044 | -1.773311 |
| O  | -5.646509 | -3.090219 | 0.277116  | O  | 3.713608   | -2.019471 | -1.957773 |
| H  | 2.737457  | -0.741971 | 0.100751  | H  | 4.824076   | -0.147040 | -0.759068 |
| H  | -6.743080 | -0.742874 | 0.103686  | H  | -0.621148  | 4.197285  | -0.795257 |
| H  | -1.100733 | 2.517177  | 2.751654  | H  | 0.177820   | 2.996771  | -1.874792 |
| H  | -2.002395 | 0.969372  | 2.961708  | Ni | -0.066849  | -0.869821 | -0.953659 |
| Ni | -2.002589 | -1.578439 | 0.579821  | N  | -0.129972  | -1.720810 | 0.904356  |
| C  | -2.003309 | 3.145885  | -1.062832 | C  | -1.312376  | -2.035280 | 1.478169  |
| H  | -2.904381 | 2.517034  | 2.751962  | C  | -1.400222  | -2.750183 | 2.678883  |
| H  | 0.367178  | 2.916552  | 0.489948  | C  | -0.219757  | -3.163568 | 3.313437  |
| H  | 2.629791  | 1.843852  | 0.138427  | C  | 1.006739   | -2.840758 | 2.714652  |
| H  | -4.373133 | 2.916137  | 0.490291  | C  | 1.007700   | -2.122701 | 1.512712  |
| H  | -6.635746 | 1.842980  | 0.140220  | H  | 1.963050   | -3.144826 | 3.164670  |
| H  | -2.002746 | 4.224541  | -1.310759 | C  | 0.236179   | 2.447027  | 2.659044  |
| H  | -2.905309 | 2.675820  | -1.514320 | H  | 1.176833   | 4.074791  | -0.832900 |
| H  | -1.102064 | 2.674786  | -1.514741 | H  | 0.287942   | 3.171121  | 3.494832  |
| H  | -0.770721 | -3.864829 | 0.547428  | H  | 1.104557   | 1.753249  | 2.733710  |
| H  | -3.234088 | -3.865069 | 0.548442  | H  | -0.697727  | 1.848523  | 2.762145  |
|    |           |           |           | H  | -2.217372  | -1.709468 | 0.944389  |
|    |           |           |           | H  | -2.389451  | -2.981118 | 3.100309  |
|    |           |           |           | H  | -0.2551660 | -3.731636 | 4.255438  |
|    |           |           |           | H  | -4.794644  | 0.539172  | -0.650983 |
|    |           |           |           | H  | -2.106624  | 3.447019  | 1.214304  |
|    |           |           |           | H  | -4.469471  | 2.670564  | 0.777261  |
|    |           |           |           | H  | 2.622040   | 3.157514  | 1.082752  |
|    |           |           |           | H  | 4.842184   | 2.054420  | 0.598256  |
|    |           |           |           | H  | 1.950242   | -1.864872 | 1.007494  |
|    |           |           |           | H  | 1.347008   | -2.820295 | -2.260406 |
|    |           |           |           | H  | -1.760592  | -2.561393 | -2.290489 |

### S1.10.9 Bis(methylamido)-substituted nickel(II) dipyridylmethane H

| H  |           |           | H(py)     |    |           |           |           |
|----|-----------|-----------|-----------|----|-----------|-----------|-----------|
| C  | -0.709658 | 0.995739  | 0.720061  | C  | -1.183067 | 1.742559  | 0.243037  |
| C  | 0.453459  | 1.787890  | 0.805609  | C  | -2.254257 | 2.457515  | 0.822513  |
| C  | 1.720131  | 1.200208  | 0.708583  | C  | -3.564916 | 1.988472  | 0.668228  |
| C  | 1.800719  | -0.185465 | 0.521273  | C  | -3.785148 | 0.829076  | -0.084537 |
| C  | 0.616719  | -0.917823 | 0.446692  | C  | -2.674533 | 0.153176  | -0.605565 |
| C  | -2.059190 | 1.709228  | 0.915229  | C  | 0.193822  | 2.438608  | 0.207047  |
| C  | -3.317334 | 0.967787  | 0.438703  | C  | 1.485035  | 1.606151  | 0.027787  |
| N  | -0.618049 | -0.344437 | 0.547270  | N  | -1.403741 | 0.590913  | -0.421358 |
| N  | -3.398297 | -0.378904 | 0.551237  | N  | 1.491237  | 0.364263  | -0.500927 |
| C  | -4.449781 | 1.721958  | 0.074545  | C  | 2.695794  | 2.270551  | 0.325507  |
| C  | -5.671572 | 1.082926  | -0.176031 | C  | 3.919105  | 1.657144  | 0.032040  |
| C  | -5.752011 | -0.305773 | -0.007735 | C  | 3.911933  | 0.388214  | -0.556184 |
| C  | -4.600018 | -0.998310 | 0.363062  | C  | 2.678460  | -0.232633 | -0.792063 |
| C  | -2.243863 | 1.962069  | 2.430251  | C  | 0.134634  | 3.416337  | -0.992418 |
| O  | -2.003844 | 3.010942  | 0.324432  | O  | 0.333661  | 3.277844  | 1.362469  |
| C  | 0.616263  | -2.393304 | 0.178244  | C  | -2.867155 | -1.102326 | -1.432430 |
| C  | -4.609031 | -2.463052 | 0.696817  | C  | 2.654641  | -1.642220 | -1.345694 |
| N  | -0.653679 | -2.880116 | 0.166796  | N  | -1.694348 | -1.701423 | -1.747849 |
| O  | 1.664545  | -3.010413 | -0.061601 | O  | -4.024801 | -1.448591 | -1.740443 |
| N  | -3.350882 | -2.890273 | 0.983879  | N  | 1.405296  | -2.151400 | -1.428739 |
| O  | -5.661848 | -3.112258 | 0.771482  | O  | 3.734664  | -2.201739 | -1.620931 |
| H  | 2.742881  | -0.743708 | 0.418844  | H  | 4.815166  | -0.172165 | -0.837558 |
| H  | -6.675872 | -0.889757 | -0.131060 | H  | -0.725371 | 4.103399  | -0.873731 |
| H  | -1.383909 | 2.536424  | 2.825342  | H  | 0.014912  | 2.851796  | -1.936927 |
| H  | -2.315097 | 0.998620  | 2.970579  | Ni | -0.081166 | -0.960170 | -0.830288 |
| Ni | -1.997880 | -1.643595 | 0.609058  | N  | -0.217416 | -1.758599 | 1.048882  |
| C  | -1.781704 | 3.057675  | -1.081253 | C  | -1.386192 | -2.260957 | 1.505671  |
| H  | -3.172772 | 2.540418  | 2.598433  | C  | -1.490254 | -2.931492 | 2.730998  |
| H  | 0.332880  | 2.871284  | 0.944495  | C  | -0.341513 | -3.094043 | 3.518292  |
| H  | 2.627587  | 1.819074  | 0.775446  | C  | 0.871723  | -2.576184 | 3.041668  |
| H  | -4.353760 | 2.814904  | 0.024475  | C  | 0.891391  | -1.920574 | 1.805026  |
| H  | -6.554138 | 1.670205  | -0.471372 | H  | 1.804675  | -2.680737 | 3.614563  |
| H  | -1.842250 | 4.124435  | -1.369953 | C  | 0.434221  | 2.598137  | 2.605543  |
| H  | -2.549636 | 2.488296  | -1.651230 | H  | 1.066853  | 4.011095  | -1.044177 |
| H  | -0.778163 | 2.668251  | -1.363070 | H  | 0.503793  | 3.378889  | 3.387354  |
| C  | -0.806213 | -4.242513 | -0.316808 | H  | 1.342187  | 1.955274  | 2.663108  |
| H  | -0.009228 | -4.460624 | -1.057655 | H  | -0.456855 | 1.962836  | 2.813506  |
| H  | -1.797058 | -4.368420 | -0.790524 | H  | -2.262781 | -2.127256 | 0.854352  |
| H  | -0.705884 | -5.000841 | 0.490436  | H  | -2.466566 | -3.322910 | 3.051959  |
| C  | -3.240293 | -4.209795 | 1.580405  | H  | -0.389322 | -3.619545 | 4.484140  |
| H  | -3.349959 | -5.032166 | 0.839635  | H  | -4.778763 | 0.410417  | -0.299691 |
| H  | -4.050784 | -4.350437 | 2.327074  | H  | -2.039420 | 3.392216  | 1.358222  |
| H  | -2.261488 | -4.315010 | 2.082317  | H  | -4.406189 | 2.540468  | 1.115421  |
|    |           |           |           | H  | 2.650638  | 3.272864  | 0.773243  |
|    |           |           |           | H  | 4.865803  | 2.173304  | 0.255048  |
|    |           |           |           | H  | 1.827837  | -1.515344 | 1.394060  |
|    |           |           |           | C  | -1.807695 | -2.886422 | -2.576953 |
|    |           |           |           | H  | -0.976599 | -2.930141 | -3.307623 |
|    |           |           |           | H  | -2.778815 | -2.890101 | -3.114950 |
|    |           |           |           | H  | -1.766802 | -3.824177 | -1.975314 |
|    |           |           |           | C  | 1.334084  | -3.553888 | -1.789623 |
|    |           |           |           | H  | 1.170917  | -3.698060 | -2.882037 |
|    |           |           |           | H  | 0.488945  | -4.043691 | -1.265622 |
|    |           |           |           | H  | 2.284049  | -4.072641 | -1.538078 |

### S1.10.10 Bis(pyrrolido)-substituted nickel(II) dipyridylmethane I

| I  |           |           | I(py)     |    |           |           |           |
|----|-----------|-----------|-----------|----|-----------|-----------|-----------|
| C  | 1.309311  | 1.290176  | 0.256508  | C  | -1.284342 | 4.181717  | 1.405744  |
| C  | 2.451849  | 2.108277  | 0.302732  | C  | -2.283639 | 5.005427  | 1.960461  |
| C  | 3.728457  | 1.530242  | 0.202154  | C  | -3.633203 | 4.642085  | 1.808699  |
| C  | 3.839529  | 0.15123   | 0.062145  | C  | -3.957083 | 3.487958  | 1.104215  |
| C  | 2.667819  | -0.637298 | 0.029548  | C  | -2.914074 | 2.679479  | 0.586149  |
| C  | -0.046016 | 1.991256  | 0.467451  | C  | 0.146989  | 4.772040  | 1.381055  |
| C  | -1.317732 | 1.269237  | -0.012172 | C  | 1.395594  | 3.869765  | 1.215952  |
| N  | 1.410049  | -0.052519 | 0.128219  | N  | -1.593238 | 3.036206  | 0.765839  |
| N  | -1.412929 | -0.076666 | 0.070514  | N  | 1.343730  | 2.669150  | 0.602975  |
| C  | -2.432695 | 2.059664  | -0.339898 | C  | 2.623661  | 4.452713  | 1.585610  |
| C  | -3.670524 | 1.443193  | -0.592748 | C  | 3.821460  | 3.785165  | 1.276930  |
| C  | -3.783245 | 0.061952  | -0.469011 | C  | 3.773429  | 2.569087  | 0.605467  |
| C  | -2.644257 | -0.694129 | -0.114157 | C  | 2.512468  | 2.010476  | 0.276217  |
| C  | -0.219263 | 2.211962  | 1.989240  | C  | 0.170669  | 5.746626  | 0.176819  |
| O  | 0.004799  | 3.305619  | -0.095419 | O  | 0.326950  | 5.606006  | 2.535008  |
| C  | 2.626606  | -2.054346 | -0.125805 | C  | -3.135251 | 1.451904  | -0.129877 |
| C  | -2.613790 | -2.099343 | 0.139204  | C  | 2.353131  | 0.741373  | -0.381138 |
| N  | 1.354351  | -2.599804 | -0.107848 | N  | -2.021894 | 0.723091  | -0.508505 |
| C  | 3.574767  | -3.059859 | -0.421007 | C  | -4.316442 | 0.796142  | -0.561121 |
| N  | -1.359478 | -2.593166 | 0.454996  | N  | 1.064759  | 0.279971  | -0.582845 |
| C  | -3.583270 | -3.112680 | 0.312182  | C  | 3.290676  | -0.203640 | -0.871431 |
| H  | 4.815831  | -0.346202 | -0.017882 | H  | 4.689433  | 2.028261  | 0.330496  |
| H  | -4.737012 | -0.458458 | -0.632239 | H  | -0.647170 | 6.485925  | 0.276240  |
| H  | 0.642971  | 2.781269  | 2.386259  | H  | 0.034124  | 5.184059  | -0.766526 |
| H  | -0.279564 | 1.236062  | 2.507965  | Ni | -0.321034 | 1.468721  | 0.246016  |
| Ni | 0.003532  | -1.345204 | 0.189272  | N  | -0.366687 | 0.522380  | 2.057895  |
| C  | 0.202329  | 3.382806  | -1.503260 | C  | 0.772829  | 0.044870  | 2.604565  |
| H  | -1.150357 | 2.780360  | 2.177538  | C  | 0.785940  | -0.661025 | 3.813782  |
| H  | 2.315993  | 3.190944  | 0.421218  | C  | -0.425159 | -0.887879 | 4.483082  |
| H  | 4.627794  | 2.163645  | 0.237003  | C  | -1.607069 | -0.400291 | 3.907440  |
| H  | -2.317756 | 3.150517  | -0.357441 | C  | -1.536321 | 0.296961  | 2.695040  |
| H  | -4.545912 | 2.052474  | -0.864481 | C  | 0.347438  | 4.928214  | 3.782663  |
| H  | 0.147959  | 4.456940  | -1.765647 | H  | 1.140909  | 6.278160  | 0.141202  |
| H  | -0.583172 | 2.835393  | -2.070370 | H  | 0.492906  | 5.703047  | 4.560257  |
| H  | 1.196652  | 2.989316  | -1.810437 | H  | 1.183280  | 4.195035  | 3.848945  |
| C  | 1.472716  | -3.919066 | -0.411015 | H  | -0.607974 | 4.393045  | 3.986161  |
| C  | 2.834136  | -4.245199 | -0.603341 | H  | 1.699108  | 0.224137  | 2.036933  |
| C  | -1.513928 | -3.884760 | 0.845037  | H  | 1.741315  | -1.030204 | 4.214248  |
| C  | -2.877983 | -4.246352 | 0.766774  | H  | -5.001528 | 3.184955  | 0.947283  |
| H  | -4.664658 | -3.020664 | 0.155470  | H  | -1.990956 | 5.933664  | 2.467164  |
| H  | -3.298124 | -5.223352 | 1.034254  | H  | -4.426707 | 5.277825  | 2.231303  |
| H  | -0.665695 | -4.485500 | 1.190961  | H  | 2.622553  | 5.432430  | 2.079919  |
| H  | 0.596216  | -4.568590 | -0.504541 | H  | 4.789290  | 4.231716  | 1.553052  |
| H  | 4.659793  | -2.931797 | -0.514444 | C  | -3.889129 | -0.370304 | -1.227248 |
| H  | 3.224581  | -5.237164 | -0.860399 | H  | -5.349413 | 1.140235  | -0.426180 |
|    |           |           |           | C  | -2.476464 | -0.374106 | -1.162618 |
|    |           |           |           | H  | -1.784001 | -1.120675 | -1.571415 |
|    |           |           |           | H  | -4.519929 | -1.124946 | -1.713232 |
|    |           |           |           | C  | 2.529335  | -1.273135 | -1.383318 |
|    |           |           |           | H  | 4.383895  | -0.111857 | -0.867861 |
|    |           |           |           | C  | 1.171772  | -0.934331 | -1.175087 |
|    |           |           |           | H  | 0.282319  | -1.526149 | -1.425598 |
|    |           |           |           | H  | 2.905953  | -2.188240 | -1.856931 |
|    |           |           |           | H  | -0.448381 | -1.441716 | 5.434037  |
|    |           |           |           | H  | -2.585508 | -0.559125 | 4.383737  |
|    |           |           |           | H  | -2.443660 | 0.676682  | 2.199932  |

S1.10.11 Bis(pyrazolato)-substituted nickel(II) dipyridylmethane J

| J  |           |           | J(py)     |    |           |           |           |
|----|-----------|-----------|-----------|----|-----------|-----------|-----------|
| C  | 1.318715  | 1.282243  | 0.171392  | C  | -1.298908 | 4.200028  | 1.400295  |
| C  | 2.459723  | 2.105067  | 0.113159  | C  | -2.299175 | 5.040757  | 1.931292  |
| C  | 3.727336  | 1.529783  | -0.052014 | C  | -3.646071 | 4.667369  | 1.807704  |
| C  | 3.834986  | 0.142938  | -0.137190 | C  | -3.970065 | 3.483072  | 1.149634  |
| C  | 2.668505  | -0.641778 | -0.052747 | C  | -2.929111 | 2.668665  | 0.649680  |
| C  | -0.020258 | 1.980357  | 0.471896  | C  | 0.135983  | 4.785181  | 1.362025  |
| C  | -1.321674 | 1.273375  | 0.052070  | C  | 1.381232  | 3.867537  | 1.260833  |
| N  | 1.416991  | -0.063544 | 0.091146  | N  | -1.609635 | 3.034026  | 0.800318  |
| N  | -1.420680 | -0.074246 | 0.082205  | N  | 1.335169  | 2.662644  | 0.658457  |
| C  | -2.448319 | 2.084092  | -0.182264 | C  | 2.605680  | 4.435680  | 1.670133  |
| C  | -3.699556 | 1.490521  | -0.402950 | C  | 3.800508  | 3.741947  | 1.425723  |
| C  | -3.811661 | 0.102299  | -0.347761 | C  | 3.756518  | 2.514926  | 0.767830  |
| C  | -2.661868 | -0.667791 | -0.086041 | C  | 2.503190  | 1.984691  | 0.387488  |
| C  | -0.097262 | 2.169312  | 2.005963  | C  | 0.182687  | 5.699578  | 0.113297  |
| O  | 0.001094  | 3.305351  | -0.068769 | O  | 0.304903  | 5.673313  | 2.477408  |
| C  | 2.629518  | -2.072701 | -0.095458 | C  | -3.152351 | 1.417041  | -0.033499 |
| C  | -2.631190 | -2.091725 | 0.071096  | C  | 2.344364  | 0.721448  | -0.292286 |
| N  | 1.372630  | -2.618392 | 0.042296  | N  | -2.043856 | 0.699063  | -0.409570 |
| C  | 3.543970  | -3.131889 | -0.261922 | C  | -4.300968 | 0.685128  | -0.410099 |
| N  | -1.379503 | -2.612321 | 0.313845  | N  | 1.062478  | 0.302959  | -0.551013 |
| C  | -3.559152 | -3.149697 | 0.147784  | C  | 3.235557  | -0.268003 | -0.765381 |
| H  | 4.805836  | -0.356963 | -0.256923 | H  | 4.671328  | 1.951215  | 0.538630  |
| H  | -4.773741 | -0.407981 | -0.492154 | H  | -0.632370 | 6.446905  | 0.165235  |
| H  | 0.786635  | 2.734779  | 2.358452  | H  | 0.057453  | 5.092434  | -0.803548 |
| H  | -0.119130 | 1.181798  | 2.505669  | Ni | -0.334394 | 1.463309  | 0.252158  |
| Ni | 0.000274  | -1.370380 | 0.194749  | N  | -0.395686 | 0.380102  | 1.960689  |
| C  | 0.095128  | 3.409651  | -1.486087 | C  | -0.576160 | -0.951406 | 1.802549  |
| H  | -1.015896 | 2.728860  | 2.267637  | C  | -0.636524 | -1.817344 | 2.901765  |
| H  | 2.326997  | 3.190162  | 0.210089  | C  | -0.506236 | -1.294161 | 4.196473  |
| H  | 4.623679  | 2.1659930 | -0.104691 | C  | -0.31863  | 0.087868  | 4.348611  |
| H  | -2.324420 | 3.173904  | -0.158984 | C  | -0.269813 | 0.889667  | 3.202030  |
| H  | -4.583569 | 2.116184  | -0.598142 | H  | -0.210794 | 0.546826  | 5.342291  |
| H  | 0.041531  | 4.489988  | -1.721489 | C  | 0.298722  | 5.065082  | 3.759673  |
| H  | -0.739985 | 2.888670  | -2.004837 | H  | 1.156258  | 6.224439  | 0.067704  |
| H  | 1.055875  | 3.006178  | -1.876203 | H  | 0.440597  | 5.879351  | 4.496443  |
| N  | 1.413914  | -3.932405 | -0.032431 | H  | 1.126806  | 4.329793  | 3.882140  |
| C  | 2.716867  | -4.270040 | -0.213232 | H  | -0.666509 | 4.553774  | 3.979379  |
| N  | -1.437176 | -3.906324 | 0.546632  | H  | -0.671374 | -1.308615 | 0.762145  |
| C  | -2.745849 | -4.258226 | 0.451673  | H  | -0.784529 | -2.893537 | 2.731204  |
| H  | -4.646082 | -3.112671 | 0.016366  | H  | -0.549840 | -1.954013 | 5.076493  |
| H  | -3.040481 | -5.302935 | 0.614892  | H  | -5.013579 | 3.167360  | 1.013253  |
| H  | 4.629230  | -3.078597 | -0.401276 | H  | -2.006864 | 5.988239  | 2.401511  |
| H  | 2.996358  | -5.327760 | -0.302624 | H  | -4.438589 | 5.315014  | 2.213285  |
|    |           |           |           | H  | 2.603994  | 5.425367  | 2.144361  |
|    |           |           |           | H  | 4.764023  | 4.174002  | 1.737105  |
|    |           |           |           | H  | -0.125072 | 1.979579  | 3.271597  |
|    |           |           |           | C  | -3.760053 | -0.473324 | -0.996205 |
|    |           |           |           | N  | -2.399960 | -0.450053 | -0.973138 |
|    |           |           |           | C  | 2.372034  | -1.251945 | -1.279502 |
|    |           |           |           | N  | 1.068350  | -0.893491 | -1.128155 |
|    |           |           |           | H  | -5.355466 | 0.954151  | -0.282056 |
|    |           |           |           | H  | 4.331065  | -0.268866 | -0.742304 |
|    |           |           |           | H  | -4.286900 | -1.330208 | -1.437405 |
|    |           |           |           | H  | 2.626535  | -2.208573 | -1.755456 |

S1.10.12 Bis(imidazolato)-substituted nickel(II) dipyridylmethane K

| K  |           |           | K(py)     |    |           |           |           |
|----|-----------|-----------|-----------|----|-----------|-----------|-----------|
| C  | 1.313409  | 1.283237  | 0.213745  | C  | 1.525051  | 1.198916  | -1.308167 |
| C  | 2.462359  | 2.095815  | 0.201576  | C  | 0.509224  | 2.012768  | -0.766746 |
| C  | 3.733255  | 1.515144  | 0.060692  | C  | -0.837571 | 1.661654  | -0.964490 |
| C  | 3.836879  | 0.131228  | -0.053054 | C  | -1.148069 | 0.521656  | -1.700973 |
| C  | 2.659525  | -0.637909 | -0.017544 | C  | -0.088098 | -0.271271 | -2.192555 |
| C  | -0.030749 | 1.988592  | 0.470105  | C  | 2.960330  | 1.779301  | -1.272360 |
| C  | -1.317586 | 1.267961  | 0.032342  | C  | 4.202112  | 0.870403  | -1.446692 |
| N  | 1.409132  | -0.061623 | 0.107858  | N  | 1.226306  | 0.067389  | -1.977752 |
| N  | -1.410927 | -0.079441 | 0.090868  | N  | 4.149243  | -0.303519 | -2.108489 |
| C  | -2.447389 | 2.060153  | -0.242413 | C  | 5.434301  | 1.416339  | -1.033028 |
| C  | -3.693685 | 1.450832  | -0.464174 | C  | 6.629093  | 0.745490  | -1.346085 |
| C  | -3.800189 | 0.065004  | -0.371386 | C  | 6.578624  | -0.441755 | -2.071486 |
| C  | -2.643743 | -0.68075  | -0.080128 | C  | 5.314613  | -0.952807 | -2.438786 |
| C  | -0.148614 | 2.210304  | 1.997306  | C  | 3.023628  | 2.802525  | -2.434403 |
| O  | 0.002901  | 3.301585  | -0.095342 | O  | 3.117951  | 2.561639  | -0.081131 |
| C  | 2.616942  | -2.065956 | -0.123508 | C  | -0.303085 | -1.494366 | -2.929861 |
| C  | -2.609312 | -2.100390 | 0.122548  | C  | 5.153577  | -2.190016 | -3.166484 |
| N  | 1.364232  | -2.627406 | -0.051742 | N  | 0.791028  | -2.234437 | -3.305186 |
| N  | 3.604381  | -2.943155 | -0.357752 | N  | -1.490409 | -2.023628 | -3.291656 |
| N  | -1.369120 | -2.621124 | 0.406283  | N  | 3.881743  | -2.634910 | -3.430998 |
| N  | -3.612662 | -2.986750 | 0.203907  | N  | 6.136353  | -2.996398 | -3.619164 |
| H  | 4.792983  | -0.398663 | -0.164864 | H  | 7.471388  | -1.007509 | -2.372174 |
| H  | -4.745480 | -0.479848 | -0.501329 | H  | 2.210604  | 3.545726  | -2.325696 |
| H  | 0.726810  | 2.781667  | 2.361062  | H  | 2.907024  | 2.281830  | -3.404146 |
| H  | -0.187800 | 1.235540  | 2.520207  | Ni | 2.491957  | -1.492733 | -2.542028 |
| Ni | 0.002983  | -1.368972 | 0.194422  | N  | 2.441726  | -2.508747 | -0.764087 |
| C  | 0.142310  | 3.378184  | -1.510817 | C  | 1.272042  | -2.721382 | -0.122129 |
| H  | -1.072378 | 2.778129  | 2.220040  | C  | 1.191140  | -3.458007 | 1.065886  |
| H  | 2.333507  | 3.180862  | 0.307192  | C  | 2.362968  | -4.000494 | 1.612084  |
| H  | 4.632654  | 2.149209  | 0.044795  | C  | 3.574275  | -3.785233 | 0.939679  |
| H  | -2.332361 | 3.151416  | -0.244470 | C  | 3.571406  | -3.036938 | -0.243781 |
| H  | -4.577735 | 2.067325  | -0.687058 | C  | 3.097585  | 1.831798  | 1.137195  |
| H  | 0.088893  | 4.453061  | -1.769587 | H  | 3.998943  | 3.325775  | -2.422712 |
| H  | -0.672117 | 2.840462  | -2.045354 | H  | 3.221791  | 2.572331  | 1.950810  |
| H  | 1.118359  | 2.974380  | -1.860343 | H  | 3.928244  | 1.092271  | 1.198185  |
| C  | 1.567942  | -3.958801 | -0.275219 | H  | 2.134421  | 1.293133  | 1.288567  |
| C  | 2.953855  | -4.134382 | -0.453186 | H  | 0.370425  | -2.297443 | -0.589962 |
| C  | -1.601804 | -3.932483 | 0.704289  | H  | 0.212466  | -3.603536 | 1.545749  |
| C  | -2.988557 | -4.139564 | 0.570128  | H  | -2.176547 | 0.199142  | -1.914860 |
| H  | 3.488063  | -5.073608 | -0.651366 | H  | 0.791322  | 2.926316  | -0.227566 |
| H  | 0.753092  | -4.686952 | -0.325467 | H  | -1.637857 | 2.295299  | -0.551631 |
| H  | -0.811580 | -4.619865 | 1.022153  | H  | 5.437799  | 2.374755  | -0.497835 |
| H  | -3.544237 | -5.072266 | 0.737744  | H  | 7.596164  | 1.167861  | -1.031809 |
|    |           |           |           | C  | -1.141048 | -3.165956 | -3.939792 |
|    |           |           |           | C  | 0.262470  | -3.310362 | -3.949372 |
|    |           |           |           | H  | 0.886420  | -4.105312 | -4.376210 |
|    |           |           |           | H  | -1.892195 | -3.839409 | -4.376093 |
|    |           |           |           | C  | 5.459405  | -4.015169 | -4.211465 |
|    |           |           |           | C  | 4.068573  | -3.807105 | -4.096451 |
|    |           |           |           | H  | 3.231914  | -4.421843 | -4.450745 |
|    |           |           |           | H  | 5.978981  | -4.853073 | -4.697322 |
|    |           |           |           | H  | 2.331676  | -4.586923 | 2.542996  |
|    |           |           |           | H  | 4.522283  | -4.195006 | 1.317345  |
|    |           |           |           | H  | 4.500020  | -2.863442 | -0.808802 |

### S1.10.13 Bis(trifluoromethylpyrazolato)-substituted nickel(II) dipyridylmethane L

| L  |           |           | L(py)     |    |            |           |           |
|----|-----------|-----------|-----------|----|------------|-----------|-----------|
| C  | 2.234452  | 1.301337  | 0.097308  | C  | -17.034387 | 6.821353  | 2.496604  |
| C  | 3.375257  | 2.123516  | 0.026005  | C  | -18.036828 | 7.663746  | 3.020817  |
| C  | 4.640358  | 1.549880  | -0.156435 | C  | -19.383513 | 7.296438  | 2.886918  |
| C  | 4.747257  | 0.162600  | -0.247693 | C  | -19.706811 | 6.113703  | 2.224050  |
| C  | 3.582043  | -0.619514 | -0.151685 | C  | -18.664466 | 5.298982  | 1.733104  |
| C  | 0.900108  | 2.000823  | 0.414209  | C  | -15.597758 | 7.402619  | 2.473637  |
| C  | -0.407215 | 1.291509  | 0.017645  | C  | -14.354708 | 6.482483  | 2.372845  |
| N  | 2.333331  | -0.044141 | 0.011605  | N  | -17.345735 | 5.656919  | 1.893084  |
| N  | -0.506823 | -0.056000 | 0.051417  | N  | -14.398336 | 5.282727  | 1.759386  |
| C  | -1.538631 | 2.100406  | -0.199612 | C  | -13.130943 | 7.043258  | 2.794031  |
| C  | -2.792930 | 1.507034  | -0.397458 | C  | -11.936264 | 6.350477  | 2.550757  |
| C  | -2.904100 | 0.118233  | -0.336996 | C  | -11.978564 | 5.129590  | 1.879647  |
| C  | -1.749704 | -0.648133 | -0.094761 | C  | -13.230171 | 4.608274  | 1.488579  |
| C  | 0.845561  | 2.196968  | 1.948762  | C  | -15.539414 | 8.326621  | 1.231931  |
| O  | 0.913161  | 3.321492  | -0.133487 | O  | -15.434728 | 8.279882  | 3.596751  |
| C  | 3.540825  | -2.052885 | -0.203891 | C  | -18.886485 | 4.046222  | 1.045330  |
| C  | -1.714593 | -2.074561 | 0.064682  | C  | -13.389338 | 3.350905  | 0.791732  |
| N  | 2.285024  | -2.597375 | -0.049154 | N  | -17.777168 | 3.331316  | 0.665147  |
| C  | 4.449212  | -3.107863 | -0.397995 | C  | -20.033108 | 3.314947  | 0.675034  |
| N  | -0.456922 | -2.593093 | 0.281488  | N  | -14.671390 | 2.940708  | 0.519423  |
| C  | -2.638506 | -3.129709 | 0.159968  | C  | -12.498959 | 2.368437  | 0.312937  |
| H  | 5.716458  | -0.336810 | -0.381740 | H  | -16.352198 | 9.076278  | 1.284178  |
| H  | -3.868442 | -0.392552 | -0.463119 | H  | -15.659443 | 7.728465  | 0.308492  |
| H  | 1.734199  | 2.764630  | 2.285259  | Ni | -16.068335 | 4.094715  | 1.338069  |
| H  | 0.830655  | 1.212975  | 2.455567  | N  | -16.130491 | 2.981162  | 3.030496  |
| Ni | 0.917768  | -1.348718 | 0.136307  | C  | -16.311153 | 1.651082  | 2.860422  |
| C  | 0.987056  | 3.419080  | -1.553259 | C  | -16.370957 | 0.774262  | 3.950973  |
| H  | -0.068575 | 2.758861  | 2.220657  | C  | -16.239897 | 1.285639  | 5.250039  |
| H  | 3.243386  | 3.208551  | 0.125897  | C  | -16.052105 | 2.666246  | 5.415263  |
| H  | 5.535773  | 2.186275  | -0.218386 | C  | -16.003731 | 3.479182  | 4.276863  |
| H  | -1.414446 | 3.190376  | -0.182068 | H  | -15.943806 | 3.115582  | 6.413210  |
| H  | -3.680172 | 2.132016  | -0.578748 | C  | -15.453722 | 7.661632  | 4.874880  |
| H  | 0.925634  | 4.497819  | -1.793007 | H  | -14.564376 | 8.849489  | 1.198070  |
| H  | 0.147111  | 2.891916  | -2.057625 | H  | -15.319298 | 8.470336  | 5.618829  |
| H  | 1.943958  | 3.017812  | -1.954710 | H  | -14.626904 | 6.925477  | 5.000068  |
| N  | 2.317272  | -3.907964 | -0.138548 | H  | -16.420959 | 7.148646  | 5.080964  |
| C  | 3.615310  | -4.242135 | -0.345995 | H  | -20.750300 | 5.802373  | 2.078108  |
| N  | -0.503186 | -3.884391 | 0.516546  | H  | -13.133585 | 8.028330  | 3.277899  |
| C  | -1.812197 | -4.234307 | 0.447532  | H  | -15.858507 | 4.568221  | 4.357689  |
| H  | -3.727254 | -3.108902 | 0.051930  | C  | -19.485442 | 2.159123  | 0.088236  |
| H  | 5.531126  | -3.069592 | -0.557699 | N  | -18.126677 | 2.184232  | 0.102297  |
| C  | 4.015835  | -5.679621 | -0.509492 | C  | -13.368139 | 1.398039  | -0.219345 |
| C  | -2.236585 | -5.654209 | 0.686507  | N  | -14.670974 | 1.756759  | -0.074100 |
| F  | 3.690728  | -6.432113 | 0.564779  | H  | -21.090426 | 3.566563  | 0.804053  |
| F  | 5.362952  | -5.769843 | -0.678947 | H  | -11.404884 | 2.350150  | 0.337726  |
| F  | 3.434267  | -6.252428 | -1.588882 | C  | -20.224611 | 0.993561  | -0.496574 |
| F  | -1.963252 | -6.066573 | 1.947213  | C  | -13.002933 | 0.095926  | -0.865715 |
| F  | -1.633514 | -6.520941 | -0.155305 | F  | -19.893686 | -0.176740 | 0.102901  |
| F  | -3.579808 | -5.773253 | 0.504965  | F  | -19.989153 | 0.837406  | -1.820226 |
|    |           |           |           | F  | -21.566436 | 1.160842  | -0.342454 |
|    |           |           |           | F  | -13.478264 | -0.008788 | -2.127439 |
|    |           |           |           | F  | -11.650222 | -0.039430 | -0.927824 |
|    |           |           |           | F  | -13.480098 | -0.970762 | -0.175555 |
|    |           |           |           | H  | -11.063406 | 4.566930  | 1.649435  |
|    |           |           |           | H  | -10.974012 | 6.777484  | 2.872171  |
|    |           |           |           | H  | -20.176620 | 7.946295  | 3.287235  |
|    |           |           |           | H  | -17.744561 | 8.608639  | 3.496390  |
|    |           |           |           | H  | -16.408652 | 1.299614  | 1.818686  |
|    |           |           |           | H  | -16.519201 | -0.299887 | 3.768834  |
|    |           |           |           | H  | -16.283123 | 0.617503  | 6.123691  |



### S1.10.14 Bis(quinolinolato)-substituted nickel(II) dipyridylmethane M

| M  |           |           | M(py)     |    |           |           |           |
|----|-----------|-----------|-----------|----|-----------|-----------|-----------|
| C  | -0.974104 | 1.415281  | 0.308790  | C  | 12.020048 | 6.334468  | -2.290369 |
| C  | -1.454174 | 0.106148  | 0.014054  | C  | 11.464714 | 5.021228  | -2.287214 |
| C  | 0.389151  | 1.644722  | 0.422042  | C  | 13.393150 | 6.519442  | -2.329974 |
| C  | 1.328831  | 0.585473  | 0.260619  | C  | 14.270060 | 5.392108  | -2.348911 |
| N  | 0.898588  | -0.655887 | -0.004098 | N  | 13.765839 | 4.156157  | -2.312599 |
| C  | -0.453486 | -0.902890 | -0.133320 | C  | 12.413602 | 3.943870  | -2.289651 |
| C  | -2.812792 | -0.278704 | -0.144414 | C  | 10.078261 | 4.716910  | -2.287371 |
| C  | -3.113345 | -1.612554 | -0.438672 | C  | 9.680335  | 3.376395  | -2.300505 |
| C  | -2.120645 | -2.608509 | -0.584092 | C  | 10.603380 | 2.310122  | -2.305143 |
| C  | -0.759407 | -2.270727 | -0.432323 | C  | 12.000999 | 2.547203  | -2.293873 |
| H  | 0.783183  | 2.648386  | 0.633875  | H  | 13.831247 | 7.526651  | -2.360172 |
| H  | -1.689362 | 2.242540  | 0.439494  | H  | 11.344480 | 7.204986  | -2.275628 |
| H  | -4.167982 | -1.905648 | -0.562812 | H  | 8.604248  | 3.138588  | -2.306851 |
| H  | -3.608453 | 0.472465  | -0.034887 | H  | 9.339586  | 5.531996  | -2.282721 |
| H  | -2.388692 | -3.649551 | -0.814575 | H  | 10.258463 | 1.265608  | -2.319580 |
| C  | 2.823364  | 0.943242  | 0.241736  | C  | 15.772703 | 5.662532  | -2.598954 |
| C  | 3.135366  | 1.513636  | -1.163185 | C  | 15.923780 | 5.916583  | -4.118629 |
| H  | 2.477638  | 2.379589  | -1.371280 | H  | 15.251411 | 6.738103  | -4.433781 |
| H  | 4.191050  | 1.844218  | -1.208077 | H  | 16.969077 | 6.197187  | -4.352820 |
| H  | 2.965747  | 0.736453  | -1.932638 | H  | 15.661913 | 5.000305  | -4.681178 |
| O  | 3.075206  | 2.021865  | 1.146483  | O  | 16.136272 | 6.908906  | -1.982749 |
| C  | 3.822965  | -0.195602 | 0.497780  | C  | 16.823736 | 4.588944  | -2.229977 |
| C  | 5.152533  | 0.153647  | 0.873674  | C  | 18.182263 | 5.013665  | -2.110437 |
| C  | 6.140852  | -0.812793 | 0.988291  | C  | 19.194605 | 4.078885  | -1.960668 |
| N  | 3.512641  | -1.475028 | 0.247773  | N  | 16.526066 | 3.288042  | -2.181364 |
| C  | 4.484833  | -2.450483 | 0.343443  | C  | 17.507284 | 2.342449  | -2.050037 |
| C  | 5.837251  | -2.178139 | 0.715068  | C  | 18.897218 | 2.684666  | -1.942197 |
| C  | 6.741489  | -3.272378 | 0.777276  | C  | 19.856258 | 1.644020  | -1.833826 |
| C  | 4.008515  | -3.765872 | 0.032197  | C  | 17.047874 | 0.960346  | -2.054724 |
| C  | 4.940246  | -4.822628 | 0.104553  | C  | 18.055210 | -0.031990 | -1.953961 |
| C  | 6.279090  | -4.556647 | 0.472440  | C  | 19.417611 | 0.316272  | -1.846023 |
| H  | 5.366208  | 1.214405  | 1.065139  | H  | 18.401574 | 6.089472  | -2.153696 |
| H  | 7.163314  | -0.529397 | 1.283765  | H  | 20.242446 | 4.407571  | -1.869028 |
| H  | 4.606550  | -5.843943 | -0.128467 | H  | 17.741821 | -1.086459 | -1.965570 |
| H  | 6.984281  | -5.401625 | 0.520254  | H  | 20.161402 | -0.493201 | -1.768252 |
| H  | 7.789117  | -3.098297 | 1.062660  | H  | 20.924496 | 1.891941  | -1.747789 |
| O  | 0.255054  | -3.095587 | -0.543061 | O  | 12.907088 | 1.615934  | -2.297004 |
| O  | 2.743159  | -3.876771 | -0.297137 | O  | 15.776429 | 0.712737  | -2.158984 |
| Ni | 1.869388  | -2.231825 | -0.181657 | Ni | 14.721772 | 2.404222  | -2.020588 |
| C  | 2.856011  | 1.734249  | 2.522678  | C  | 14.278173 | 1.825744  | 2.730203  |
| H  | 1.802350  | 1.438961  | 2.727955  | C  | 14.017407 | 0.799581  | 1.810284  |
| H  | 3.079448  | 2.665920  | 3.076756  | C  | 14.177593 | 1.052517  | 0.442599  |
| H  | 3.525315  | 0.926396  | 2.895562  | C  | 14.693243 | 3.075325  | 2.245594  |
|    |           |           |           | C  | 14.829987 | 3.249630  | 0.863318  |
|    |           |           |           | N  | 14.576679 | 2.260138  | -0.015992 |
|    |           |           |           | H  | 14.910537 | 3.911139  | 2.926533  |
|    |           |           |           | H  | 15.153204 | 4.211832  | 0.435506  |
|    |           |           |           | H  | 13.690427 | -0.196398 | 2.142599  |
|    |           |           |           | H  | 14.159998 | 1.654666  | 3.811085  |
|    |           |           |           | H  | 13.990086 | 0.291037  | -0.328900 |
|    |           |           |           | C  | 16.078104 | 6.930789  | -0.566722 |
|    |           |           |           | H  | 16.372886 | 7.950505  | -0.251657 |
|    |           |           |           | H  | 16.782234 | 6.201114  | -0.103345 |
|    |           |           |           | H  | 15.051360 | 6.726306  | -0.183705 |

### S1.10.15 Bis(triazolato)-substituted nickel(II) dipyridylmethane N

| N  |           |           | N(py)     |    |           |           |           |
|----|-----------|-----------|-----------|----|-----------|-----------|-----------|
| C  | 1.317394  | 1.285676  | 0.178838  | C  | -1.298100 | 4.211180  | 1.398859  |
| C  | 2.460400  | 2.106062  | 0.134290  | C  | -2.299346 | 5.051645  | 1.927580  |
| C  | 3.728066  | 1.532240  | -0.030988 | C  | -3.646068 | 4.678437  | 1.806942  |
| C  | 3.834979  | 0.145912  | -0.133905 | C  | -3.970844 | 3.492321  | 1.151434  |
| C  | 2.667400  | -0.635844 | -0.065147 | C  | -2.929753 | 2.679775  | 0.652943  |
| C  | -0.022006 | 1.984814  | 0.473818  | C  | 0.136673  | 4.796166  | 1.363222  |
| C  | -1.321339 | 1.275829  | 0.051968  | C  | 1.381058  | 3.877964  | 1.261269  |
| N  | 1.416907  | -0.059439 | 0.083423  | N  | -1.610256 | 3.043493  | 0.801334  |
| N  | -1.421757 | -0.071874 | 0.086995  | N  | 1.336280  | 2.672254  | 0.658859  |
| C  | -2.449044 | 2.082665  | -0.188296 | C  | 2.605861  | 4.443768  | 1.671598  |
| C  | -3.699505 | 1.487617  | -0.406645 | C  | 3.800695  | 3.749615  | 1.430976  |
| C  | -3.811866 | 0.099186  | -0.341687 | C  | 3.757401  | 2.521878  | 0.773255  |
| C  | -2.661887 | -0.666186 | -0.075334 | C  | 2.504769  | 1.995160  | 0.391211  |
| C  | -0.105168 | 2.176613  | 2.007578  | C  | 0.185067  | 5.712720  | 0.115725  |
| O  | 0.000998  | 3.306900  | -0.069808 | O  | 0.304625  | 5.680597  | 2.480039  |
| C  | 2.620212  | -2.066426 | -0.134208 | C  | -3.148859 | 1.428501  | -0.031225 |
| C  | -2.624709 | -2.089110 | 0.099675  | C  | 2.341957  | 0.734249  | -0.290950 |
| N  | 1.364196  | -2.612124 | -0.006404 | N  | -2.048350 | 0.713113  | -0.425110 |
| C  | 3.470995  | -3.159037 | -0.337947 | C  | -4.253373 | 0.650156  | -0.418961 |
| N  | -1.372309 | -2.606670 | 0.336103  | N  | 1.066736  | 0.317836  | -0.570622 |
| C  | -3.495881 | -3.176471 | 0.235825  | C  | 3.177996  | -0.289543 | -0.769719 |
| H  | 4.805532  | -0.354047 | -0.256248 | H  | 4.671968  | 1.957125  | 0.545106  |
| H  | -4.773819 | -0.412652 | -0.481671 | H  | -0.629288 | 6.460640  | 0.168598  |
| H  | 0.776929  | 2.743635  | 2.361863  | H  | 0.060813  | 5.108750  | -0.803360 |
| H  | -0.129251 | 1.191363  | 2.511563  | Ni | -0.333790 | 1.481205  | 0.238013  |
| Ni | 0.000564  | -1.359840 | 0.185931  | N  | -0.395291 | 0.369792  | 1.932979  |
| C  | 0.103903  | 3.408707  | -1.487486 | C  | -0.577763 | -0.960339 | 1.765236  |
| H  | -1.024424 | 2.737598  | 2.263673  | C  | -0.637257 | -1.834446 | 2.858043  |
| H  | 2.328314  | 3.190568  | 0.240104  | C  | -0.503839 | -1.320487 | 4.155742  |
| H  | 4.625067  | 2.168178  | -0.071185 | C  | -0.313972 | 0.060206  | 4.318078  |
| H  | -2.326130 | 3.172823  | -0.171735 | C  | -0.266174 | 0.870552  | 3.177828  |
| H  | -4.583400 | 2.111732  | -0.606484 | H  | -0.203594 | 0.511495  | 5.314908  |
| H  | 0.045147  | 4.488019  | -1.725300 | C  | 0.296254  | 5.070171  | 3.762082  |
| H  | -0.724269 | 2.881252  | -2.010708 | H  | 1.158624  | 6.237689  | 0.072804  |
| H  | 1.069738  | 3.010584  | -1.870201 | H  | 0.437286  | 5.883496  | 4.499766  |
| N  | 1.429026  | -3.930922 | -0.131822 | H  | 1.123788  | 4.334450  | 3.884844  |
| N  | 2.703541  | -4.276699 | -0.330490 | H  | -0.669334 | 4.558837  | 3.979589  |
| N  | -1.458784 | -3.901660 | 0.605115  | H  | -0.675968 | -1.313766 | 0.724316  |
| N  | -2.744192 | -4.260651 | 0.549479  | H  | -0.787054 | -2.908732 | 2.678210  |
| H  | -4.586623 | -3.235672 | 0.140699  | H  | -0.546735 | -1.986741 | 5.030879  |
| H  | 4.555938  | -3.201977 | -0.490925 | H  | -5.014319 | 3.175922  | 1.015415  |
|    |           |           |           | H  | -2.006904 | 5.999708  | 2.396703  |
|    |           |           |           | H  | -4.437934 | 5.326988  | 2.211902  |
|    |           |           |           | H  | 2.604150  | 5.433313  | 2.146266  |
|    |           |           |           | H  | 4.763562  | 4.181279  | 1.744321  |
|    |           |           |           | H  | -0.119470 | 1.959618  | 3.255891  |
|    |           |           |           | N  | -3.780506 | -0.475135 | -1.002434 |
|    |           |           |           | N  | -2.441227 | -0.423863 | -0.986992 |
|    |           |           |           | N  | 2.388530  | -1.256941 | -1.290478 |
|    |           |           |           | N  | 1.111179  | -0.875500 | -1.150774 |
|    |           |           |           | H  | -5.329291 | 0.837172  | -0.313477 |
|    |           |           |           | H  | 4.271717  | -0.375864 | -0.768043 |

### S1.10.16 Bis(trifluoromethyltriazolato)-substituted nickel(II) dipyridylmethane O

| O  |           |           | O(py)     |    |            |           |           |
|----|-----------|-----------|-----------|----|------------|-----------|-----------|
| C  | 2.235910  | 1.254699  | 0.012156  | C  | -17.038664 | 6.784959  | 2.465848  |
| C  | 3.374568  | 2.062711  | -0.180027 | C  | -18.047910 | 7.617393  | 2.995798  |
| C  | 4.625853  | 1.474590  | -0.405710 | C  | -19.392911 | 7.238023  | 2.880594  |
| C  | 4.729636  | 0.082051  | -0.410088 | C  | -19.714198 | 6.048212  | 2.225486  |
| C  | 3.568036  | -0.672377 | -0.196821 | C  | -18.662927 | 5.254955  | 1.732814  |
| C  | 0.931003  | 1.967230  | 0.410875  | C  | -15.607398 | 7.376689  | 2.427455  |
| C  | -0.403533 | 1.261158  | 0.111222  | C  | -14.363747 | 6.460045  | 2.311919  |
| N  | 2.331118  | -0.093134 | -0.005079 | N  | -17.347553 | 5.615397  | 1.871083  |
| N  | -0.505340 | -0.085958 | 0.088593  | N  | -14.412465 | 5.251965  | 1.715306  |
| C  | -1.549794 | 2.075120  | 0.011725  | C  | -13.131168 | 7.024238  | 2.705702  |
| C  | -2.816664 | 1.493929  | -0.128834 | C  | -11.937896 | 6.331715  | 2.455766  |
| C  | -2.926015 | 0.101916  | -0.142273 | C  | -11.986591 | 5.099793  | 1.801697  |
| C  | -1.755250 | -0.658709 | -0.020916 | C  | -13.245471 | 4.585501  | 1.444272  |
| C  | 0.989997  | 2.179041  | 1.943697  | C  | -15.568211 | 8.302027  | 1.185751  |
| O  | 0.912628  | 3.280673  | -0.150422 | O  | -15.435828 | 8.253080  | 3.548596  |
| C  | 3.521989  | -2.110527 | -0.126832 | C  | -18.882184 | 3.994738  | 1.048189  |
| C  | -1.710636 | -2.097713 | 0.026388  | C  | -13.411449 | 3.312310  | 0.768619  |
| N  | 2.286487  | -2.646978 | 0.105331  | N  | -17.796664 | 3.280374  | 0.638802  |
| N  | 4.470951  | -3.048269 | -0.204672 | N  | -20.041738 | 3.376926  | 0.767791  |
| N  | -0.465000 | -2.641730 | 0.169898  | N  | -14.674222 | 2.886525  | 0.486232  |
| N  | -2.666297 | -3.031270 | -0.008601 | N  | -12.472114 | 2.434079  | 0.379820  |
| H  | 5.678145  | -0.451475 | -0.561468 | H  | -11.091443 | 4.513254  | 1.552300  |
| H  | -3.884991 | -0.426777 | -0.232263 | H  | -16.383678 | 9.047922  | 1.248479  |
| H  | 1.905025  | 2.743050  | 2.207911  | H  | -15.695791 | 7.705568  | 0.262213  |
| H  | 1.004462  | 1.201305  | 2.462508  | Ni | -16.078190 | 4.043575  | 1.296743  |
| Ni | 0.913566  | -1.399268 | 0.153189  | N  | -16.132971 | 2.944452  | 2.999551  |
| C  | 0.855993  | 3.363384  | -1.572570 | C  | -16.314375 | 1.612847  | 2.843607  |
| H  | 0.103137  | 2.752034  | 2.275758  | C  | -16.368622 | 0.746162  | 3.942164  |
| H  | 3.253480  | 3.152384  | -0.128265 | C  | -16.230923 | 1.270352  | 5.235375  |
| H  | 5.514475  | 2.104244  | -0.562208 | C  | -16.042359 | 2.652329  | 5.386409  |
| H  | -1.419822 | 3.163817  | 0.063614  | C  | -15.999793 | 3.454716  | 4.240414  |
| H  | -3.711638 | 2.128291  | -0.213817 | H  | -15.928820 | 3.110980  | 6.379424  |
| H  | 0.855714  | 4.441993  | -1.819684 | C  | -15.434221 | 7.633972  | 4.826829  |
| H  | -0.067718 | 2.901416  | -1.986189 | H  | -14.596594 | 8.830399  | 1.141533  |
| H  | 1.734946  | 2.885308  | -2.058919 | H  | -15.291006 | 8.442627  | 5.568952  |
| N  | 2.407994  | -3.966131 | 0.183576  | H  | -14.603590 | 6.900096  | 4.939496  |
| C  | 3.729945  | -4.167176 | -0.005520 | H  | -16.396963 | 7.118397  | 5.047167  |
| N  | -0.586440 | -3.961881 | 0.229824  | H  | -16.416341 | 1.250244  | 1.806773  |
| C  | -1.918593 | -4.155700 | 0.122582  | H  | -16.517469 | -0.329716 | 3.771427  |
| C  | 4.347628  | -5.543374 | 0.005624  | H  | -16.269520 | 0.610663  | 6.115523  |
| C  | -2.537258 | -5.531513 | 0.127869  | H  | -20.746185 | 5.700849  | 2.077667  |
| F  | 5.307954  | -5.634124 | 0.958031  | H  | -17.759514 | 8.566474  | 3.466110  |
| F  | 4.940319  | -5.818563 | -1.181993 | H  | -20.185542 | 7.883488  | 3.288878  |
| F  | 3.430751  | -6.495264 | 0.245176  | H  | -13.128459 | 8.014319  | 3.180006  |
| F  | -1.623618 | -6.483818 | 0.378537  | H  | -10.973241 | 6.766788  | 2.758598  |
| F  | -3.115138 | -5.808781 | -1.067345 | H  | -15.854199 | 4.544294  | 4.310388  |
| F  | -3.509036 | -5.619884 | 1.067623  | C  | -19.584597 | 2.246825  | 0.180900  |
|    |           |           |           | N  | -18.238153 | 2.145382  | 0.089324  |
|    |           |           |           | C  | -13.248227 | 1.455720  | -0.140866 |
|    |           |           |           | N  | -14.581139 | 1.682536  | -0.085533 |
|    |           |           |           | C  | -20.511565 | 1.196391  | -0.373346 |
|    |           |           |           | C  | -12.667824 | 0.184015  | -0.702773 |
|    |           |           |           | F  | -19.849372 | 0.064866  | -0.681526 |
|    |           |           |           | F  | -21.134115 | 1.629430  | -1.498607 |
|    |           |           |           | F  | -21.482534 | 0.883325  | 0.519092  |
|    |           |           |           | F  | -11.720831 | 0.443392  | -1.635486 |
|    |           |           |           | F  | -12.070342 | -0.551995 | 0.271600  |
|    |           |           |           | F  | -13.614974 | -0.584299 | -1.271574 |

### S1.10.17 Bis(carboxylato)-substituted nickel(II) dipyridylmethane with MeO-substituent 1a

1a, S = 0

|    |           |           |           |
|----|-----------|-----------|-----------|
| C  | 1.314427  | 1.302314  | 0.111937  |
| C  | 2.483185  | 2.078083  | -0.013632 |
| C  | 3.726614  | 1.461588  | -0.205199 |
| C  | 3.785074  | 0.061509  | -0.244992 |
| C  | 2.599953  | -0.656766 | -0.106683 |
| C  | -0.000285 | 2.017333  | 0.472369  |
| C  | -1.314841 | 1.301839  | 0.112491  |
| N  | 1.388234  | -0.048913 | 0.056220  |
| N  | -1.388138 | -0.049375 | 0.055930  |
| C  | -2.483960 | 2.077246  | -0.011980 |
| C  | -3.727245 | 1.460413  | -0.203384 |
| C  | -3.785153 | 0.060337  | -0.244187 |
| C  | -2.599697 | -0.657574 | -0.106862 |
| C  | 0.000057  | 2.212920  | 2.007380  |
| O  | -0.000530 | 3.336021  | -0.077030 |
| C  | 2.534152  | -2.171653 | -0.094056 |
| C  | -2.533323 | -2.172440 | -0.095282 |
| O  | 1.306036  | -2.607385 | 0.044915  |
| O  | 3.544784  | -2.856307 | -0.194055 |
| O  | -1.305033 | -2.607803 | 0.043303  |
| O  | -3.543692 | -2.857415 | -0.195755 |
| H  | 4.714251  | -0.513456 | -0.372867 |
| H  | -4.714155 | -0.514907 | -0.372086 |
| H  | 0.901556  | 2.778372  | 2.312584  |
| H  | 0.000488  | 1.229070  | 2.514906  |
| Ni | 0.000252  | -1.287531 | 0.097237  |
| C  | -0.001346 | 3.427716  | -1.498897 |
| H  | -0.901604 | 2.777839  | 2.313089  |
| H  | 2.389807  | 3.170655  | 0.055478  |
| H  | 4.637096  | 2.070825  | -0.308936 |
| H  | -2.390960 | 3.169812  | 0.057896  |
| H  | -4.638019 | 2.069359  | -0.306255 |
| H  | 0.004106  | 4.507664  | -1.740137 |
| H  | -0.905803 | 2.964537  | -1.952432 |
| H  | 0.897325  | 2.955027  | -1.954091 |

1a, S = 1

|    |           |           |           |
|----|-----------|-----------|-----------|
| C  | 1.335334  | 1.291516  | 0.115697  |
| C  | 2.482727  | 2.097500  | -0.033541 |
| C  | 3.736166  | 1.498137  | -0.220638 |
| C  | 3.830691  | 0.101083  | -0.245160 |
| C  | 2.658359  | -0.643084 | -0.088356 |
| C  | -0.000283 | 1.987368  | 0.472653  |
| C  | -1.335808 | 1.291114  | 0.116158  |
| N  | 1.447663  | -0.053458 | 0.086482  |
| N  | -1.447707 | -0.053881 | 0.086576  |
| C  | -2.483520 | 2.096776  | -0.032401 |
| C  | -3.736830 | 1.497078  | -0.219265 |
| C  | -3.830899 | 0.100002  | -0.244221 |
| C  | -2.658273 | -0.643833 | -0.088023 |
| C  | -0.000022 | 2.174827  | 2.008589  |
| O  | -0.000526 | 3.311039  | -0.069786 |
| C  | 2.670415  | -2.177286 | -0.077671 |
| C  | -2.669855 | -2.178042 | -0.077574 |
| O  | 1.478090  | -2.698764 | -0.034243 |
| O  | 3.747111  | -2.765353 | -0.113717 |
| O  | -1.477374 | -2.699180 | -0.034352 |
| O  | -3.746355 | -2.766443 | -0.114082 |
| H  | 4.774257  | -0.449688 | -0.369815 |
| H  | -4.774325 | -0.451040 | -0.368735 |
| H  | 0.901323  | 2.738488  | 2.317685  |
| H  | 0.000264  | 1.188486  | 2.511121  |
| Ni | 0.000182  | -1.469005 | 0.102447  |
| C  | -0.000876 | 3.411577  | -1.490714 |
| H  | -0.901457 | 2.738145  | 2.318042  |
| H  | 2.374317  | 3.189314  | 0.017150  |
| H  | 4.633724  | 2.125448  | -0.334996 |
| H  | -2.375437 | 3.188611  | 0.018602  |
| H  | -4.634632 | 2.124133  | -0.333109 |
| H  | 0.000487  | 4.493035  | -1.725688 |
| H  | -0.903069 | 2.948374  | -1.948782 |
| H  | 0.899755  | 2.945959  | -1.949400 |

**1a(py), MeO-side coordination, S = 1**

|    |           |           |           |
|----|-----------|-----------|-----------|
| C  | -1.286171 | 4.244835  | 1.366083  |
| C  | -2.325388 | 5.034867  | 1.901094  |
| C  | -3.655298 | 4.607579  | 1.781918  |
| C  | -3.930791 | 3.408806  | 1.111184  |
| C  | -2.856877 | 2.664897  | 0.612117  |
| C  | 0.140906  | 4.848217  | 1.341517  |
| C  | 1.373400  | 3.915611  | 1.232498  |
| N  | -1.572028 | 3.076534  | 0.754593  |
| N  | 1.304086  | 2.716988  | 0.616471  |
| C  | 2.621667  | 4.423580  | 1.649998  |
| C  | 3.788330  | 3.683399  | 1.412576  |
| C  | 3.695315  | 2.456952  | 0.741749  |
| C  | 2.428855  | 2.003328  | 0.359575  |
| C  | 0.192949  | 5.779557  | 0.107028  |
| O  | 0.305436  | 5.716895  | 2.470030  |
| C  | -3.074160 | 1.349703  | -0.156607 |
| C  | 2.241864  | 0.681242  | -0.405647 |
| O  | -1.975751 | 0.768801  | -0.527487 |
| O  | -4.231502 | 0.979092  | -0.358169 |
| O  | 1.004733  | 0.394627  | -0.667456 |
| O  | 3.247755  | 0.036751  | -0.706004 |
| H  | 4.559675  | 1.825561  | 0.489743  |
| H  | -0.621006 | 6.527702  | 0.167209  |
| H  | 0.071239  | 5.187606  | -0.820266 |
| Ni | -0.320896 | 1.591059  | 0.200679  |
| N  | -0.382912 | 0.448690  | 1.862641  |
| C  | -0.578871 | -0.868138 | 1.626577  |
| C  | -0.646905 | -1.799067 | 2.670291  |
| C  | -0.507602 | -1.354985 | 3.993153  |
| C  | -0.303225 | 0.013311  | 4.227968  |
| C  | -0.247539 | 0.881614  | 3.131686  |
| H  | -0.187821 | 0.409505  | 5.247363  |
| C  | 0.293303  | 5.091774  | 3.745055  |
| H  | 1.166471  | 6.305793  | 0.073528  |
| H  | 0.429097  | 5.897099  | 4.492290  |
| H  | 1.121537  | 4.356230  | 3.864432  |
| H  | -0.670954 | 4.574402  | 3.954084  |
| H  | -0.681799 | -1.152696 | 0.568643  |
| H  | -0.808167 | -2.861365 | 2.437074  |
| H  | -0.557278 | -2.065831 | 4.831990  |
| H  | -4.943683 | 3.013418  | 0.947039  |
| H  | -2.072555 | 5.987608  | 2.386383  |
| H  | -4.469421 | 5.220237  | 2.199419  |
| H  | 2.658775  | 5.406638  | 2.139285  |
| H  | 4.764291  | 4.075208  | 1.738841  |
| H  | -0.088653 | 1.963738  | 3.266751  |

**1a(py), MeO-side coordination, S = 0**

|    |           |           |           |
|----|-----------|-----------|-----------|
| C  | -1.241314 | 4.327024  | 1.305059  |
| C  | -2.297695 | 5.082899  | 1.849460  |
| C  | -3.614873 | 4.609013  | 1.786571  |
| C  | -3.858918 | 3.385078  | 1.147790  |
| C  | -2.778985 | 2.684236  | 0.616168  |
| C  | 0.160428  | 4.962318  | 1.257988  |
| C  | 1.370045  | 4.016117  | 1.145233  |
| N  | -1.494357 | 3.138794  | 0.706765  |
| N  | 1.264687  | 2.810089  | 0.538595  |
| C  | 2.631531  | 4.496118  | 1.547665  |
| C  | 3.783976  | 3.728645  | 1.333090  |
| C  | 3.656532  | 2.490726  | 0.687323  |
| C  | 2.386607  | 2.069194  | 0.300564  |
| C  | 0.192571  | 5.878608  | 0.012204  |
| O  | 0.333773  | 5.836421  | 2.376599  |
| C  | -2.920771 | 1.374849  | -0.135184 |
| C  | 2.127210  | 0.772599  | -0.441381 |
| O  | -1.765009 | 0.917549  | -0.546164 |
| O  | -4.018220 | 0.858198  | -0.316705 |
| O  | 0.855284  | 0.603247  | -0.704180 |
| O  | 3.042853  | 0.014755  | -0.743358 |
| H  | 4.502235  | 1.826046  | 0.456524  |
| H  | -0.625563 | 6.622030  | 0.072735  |
| H  | 0.063777  | 5.270298  | -0.903835 |
| Ni | -0.279080 | 1.892667  | 0.050178  |
| N  | -0.338556 | 0.377555  | 2.178212  |
| C  | -0.461273 | -0.901988 | 1.777775  |
| C  | -0.616993 | -1.965889 | 2.680923  |
| C  | -0.648917 | -1.686944 | 4.054938  |
| C  | -0.523327 | -0.353759 | 4.474828  |
| C  | -0.370454 | 0.638919  | 3.494792  |
| H  | -0.543395 | -0.085187 | 5.541957  |
| C  | 0.337890  | 5.220926  | 3.659687  |
| H  | 1.162559  | 6.409803  | -0.038415 |
| H  | 0.501906  | 6.032441  | 4.394159  |
| H  | 1.154361  | 4.471792  | 3.767282  |
| H  | -0.629071 | 4.720081  | 3.891740  |
| H  | -0.432359 | -1.066036 | 0.687342  |
| H  | -0.712892 | -2.995488 | 2.305257  |
| H  | -0.771006 | -2.497435 | 4.790306  |
| H  | -4.857872 | 2.939407  | 1.030315  |
| H  | -2.058465 | 6.052112  | 2.308717  |
| H  | -4.437517 | 5.198009  | 2.219342  |
| H  | 2.682867  | 5.487653  | 2.018444  |
| H  | 4.767489  | 4.102900  | 1.654913  |
| H  | -0.269270 | 1.700986  | 3.786700  |

**1a(py), Me-side coordination, S = 1**

|    |           |           |           |
|----|-----------|-----------|-----------|
| C  | -1.853114 | 1.340487  | 0.047259  |
| C  | -2.638032 | 2.479207  | -0.228777 |
| C  | -2.016002 | 3.709572  | -0.483746 |
| C  | -0.618550 | 3.785024  | -0.457450 |
| C  | 0.102944  | 2.626979  | -0.147771 |
| C  | -2.578303 | 0.018062  | 0.399464  |
| C  | -1.866440 | -1.317528 | 0.070967  |
| N  | -0.508715 | 1.443560  | 0.109345  |
| N  | -0.523029 | -1.432948 | 0.133398  |
| C  | -2.663634 | -2.452670 | -0.183231 |
| C  | -2.054909 | -3.693524 | -0.418482 |
| C  | -0.658352 | -3.782248 | -0.394473 |
| C  | 0.075345  | -2.626816 | -0.104471 |
| C  | -2.850625 | 0.032133  | 1.920096  |
| O  | -3.875993 | 0.020078  | -0.209288 |
| C  | 1.638808  | 2.636789  | -0.070676 |
| C  | 1.610396  | -2.652334 | -0.030551 |
| O  | 2.155240  | 1.495095  | 0.256102  |
| O  | 2.226197  | 3.693274  | -0.311187 |
| O  | 2.139376  | -1.515002 | 0.294877  |
| O  | 2.187693  | -3.715147 | -0.266847 |
| H  | -0.095050 | -4.708422 | -0.579174 |
| H  | -3.422890 | 0.940984  | 2.189864  |
| H  | -1.893656 | 0.026072  | 2.475224  |
| Ni | 0.875664  | 0.002074  | 0.532162  |
| C  | -3.920574 | 0.006160  | -1.633415 |
| H  | -3.440032 | -0.861766 | 2.202481  |
| H  | -4.992788 | 0.021550  | -1.908128 |
| H  | -3.455056 | -0.906929 | -2.065877 |
| H  | -3.424390 | 0.893646  | -2.084669 |
| H  | -0.045378 | 4.702492  | -0.654989 |
| H  | -3.732087 | 2.383177  | -0.229404 |
| H  | -2.626093 | 4.600282  | -0.700314 |
| H  | -3.756639 | -2.345308 | -0.183250 |
| H  | -2.674450 | -4.581534 | -0.618592 |
| N  | 0.989075  | 0.045606  | 2.544068  |
| C  | 1.002917  | 1.226083  | 3.200928  |
| C  | 1.253303  | 1.315351  | 4.574657  |
| C  | 1.505264  | 0.139695  | 5.296959  |
| C  | 1.498998  | -1.083088 | 4.610236  |
| C  | 1.240580  | -1.088264 | 3.234688  |
| H  | 0.817325  | 2.125654  | 2.595983  |
| H  | 1.711501  | 0.176980  | 6.377369  |
| H  | 1.257941  | 2.300820  | 5.062411  |
| H  | 1.255552  | -2.019673 | 2.650851  |
| H  | 1.702004  | -2.032456 | 5.126553  |

**1a(py), Me-side coordination, S = 0**

|    |           |           |           |
|----|-----------|-----------|-----------|
| C  | -1.937449 | 1.324901  | -0.082935 |
| C  | -2.696613 | 2.479472  | -0.352959 |
| C  | -2.066095 | 3.718780  | -0.529727 |
| C  | -0.671316 | 3.785243  | -0.411468 |
| C  | 0.029972  | 2.614840  | -0.128957 |
| C  | -2.677370 | 0.014770  | 0.242538  |
| C  | -1.925429 | -1.297205 | -0.046395 |
| N  | -0.589528 | 1.407182  | 0.024443  |
| N  | -0.576741 | -1.364446 | 0.061860  |
| C  | -2.674314 | -2.465623 | -0.283811 |
| C  | -2.032800 | -3.703612 | -0.427175 |
| C  | -0.637360 | -3.754177 | -0.308813 |
| C  | 0.053516  | -2.570208 | -0.059166 |
| C  | -2.985921 | 0.034810  | 1.757208  |
| O  | -3.948224 | -0.000429 | -0.411333 |
| C  | 1.532432  | 2.569414  | 0.065306  |
| C  | 1.555735  | -2.505795 | 0.131588  |
| O  | 1.953811  | 1.362157  | 0.341762  |
| O  | 2.218380  | 3.584086  | -0.015913 |
| O  | 1.966314  | -1.287654 | 0.374340  |
| O  | 2.250856  | -3.515986 | 0.076693  |
| H  | -0.043762 | -4.676730 | -0.392082 |
| H  | -3.576958 | 0.937742  | 2.005278  |
| H  | -2.036413 | 0.047229  | 2.327640  |
| Ni | 0.626213  | 0.031059  | 0.359923  |
| C  | -3.933618 | -0.020405 | -1.836153 |
| H  | -3.568817 | -0.865933 | 2.031107  |
| H  | -4.993180 | -0.029738 | -2.155843 |
| H  | -3.429272 | -0.924582 | -2.243447 |
| H  | -3.437513 | 0.876508  | -2.268831 |
| H  | -0.086051 | 4.710586  | -0.519185 |
| H  | -3.789788 | 2.382023  | -0.402065 |
| H  | -2.662004 | 4.618499  | -0.744980 |
| H  | -3.768333 | -2.379388 | -0.334712 |
| H  | -2.620723 | -4.614223 | -0.617057 |
| N  | 0.676222  | 0.060966  | 2.849427  |
| C  | 1.023966  | 1.220662  | 3.435209  |
| C  | 1.713140  | 1.287881  | 4.654561  |
| C  | 2.063257  | 0.089215  | 5.293230  |
| C  | 1.707698  | -1.123898 | 4.685583  |
| C  | 1.018833  | -1.084797 | 3.464839  |
| H  | 0.745762  | 2.145267  | 2.901013  |
| H  | 2.612175  | 0.100270  | 6.247474  |
| H  | 1.976089  | 2.264978  | 5.086208  |
| H  | 0.736321  | -2.021709 | 2.954765  |
| H  | 1.966243  | -2.090769 | 5.142193  |

**1a(py)<sub>2</sub>, S = 1**

|    |           |           |           |
|----|-----------|-----------|-----------|
| C  | -1.284220 | 4.248219  | 1.341545  |
| C  | -2.304854 | 5.015146  | 1.943337  |
| C  | -3.625683 | 4.546105  | 1.933370  |
| C  | -3.908706 | 3.323912  | 1.312084  |
| C  | -2.856839 | 2.619211  | 0.714954  |
| C  | 0.138880  | 4.862685  | 1.278350  |
| C  | 1.373001  | 3.924993  | 1.207216  |
| N  | -1.580999 | 3.081115  | 0.733309  |
| N  | 1.317619  | 2.718048  | 0.606581  |
| C  | 2.604603  | 4.427506  | 1.678835  |
| C  | 3.767718  | 3.656522  | 1.547534  |
| C  | 3.684193  | 2.398916  | 0.938509  |
| C  | 2.437578  | 1.963639  | 0.473549  |
| C  | 0.184414  | 5.767440  | 0.026937  |
| O  | 0.305117  | 5.761293  | 2.386796  |
| C  | -3.116605 | 1.292531  | -0.027032 |
| C  | 2.294233  | 0.607840  | -0.246872 |
| O  | -2.068965 | 0.783056  | -0.585661 |
| O  | -4.274511 | 0.862883  | -0.043094 |
| O  | 1.106239  | 0.368036  | -0.694446 |
| O  | 3.305479  | -0.093497 | -0.353674 |
| H  | 4.540702  | 1.725204  | 0.790916  |
| H  | -0.632441 | 6.513579  | 0.075785  |
| H  | 0.063886  | 5.155603  | -0.886632 |
| Ni | -0.314072 | 1.705540  | -0.083983 |
| N  | -0.400619 | 0.496039  | 1.693157  |
| C  | -0.609107 | -0.818304 | 1.470616  |
| C  | -0.671595 | -1.748774 | 2.516661  |
| C  | -0.512178 | -1.302472 | 3.836299  |
| C  | -0.295234 | 0.064763  | 4.062772  |
| C  | -0.247459 | 0.925702  | 2.958428  |
| H  | -0.164173 | 0.464473  | 5.079139  |
| C  | 0.305573  | 5.179057  | 3.683366  |
| H  | 1.155422  | 6.298003  | -0.017153 |
| H  | 0.441843  | 6.012288  | 4.399561  |
| H  | 1.137957  | 4.452980  | 3.824144  |
| H  | -0.652572 | 4.663210  | 3.919372  |
| H  | -0.731126 | -1.110099 | 0.417234  |
| H  | -0.843973 | -2.810673 | 2.289115  |
| H  | -0.556195 | -2.010449 | 4.678161  |
| H  | -4.912576 | 2.879043  | 1.251646  |
| H  | -2.045428 | 5.979031  | 2.401674  |
| H  | -4.424715 | 5.139814  | 2.404274  |
| H  | 2.631296  | 5.426607  | 2.134513  |
| H  | 4.730313  | 4.044096  | 1.916142  |
| H  | -0.078786 | 2.007510  | 3.091559  |
| N  | -0.283427 | 2.564454  | -2.044962 |
| C  | -1.428023 | 2.966982  | -2.633879 |
| C  | -1.482694 | 3.405407  | -3.963214 |
| C  | -0.302163 | 3.422598  | -4.719843 |
| C  | 0.887125  | 2.998003  | -4.110556 |
| C  | 0.850321  | 2.575364  | -2.775106 |
| H  | -2.336767 | 2.921451  | -2.016828 |
| H  | -0.310359 | 3.755327  | -5.769150 |
| H  | -2.444951 | 3.718826  | -4.393744 |
| H  | 1.757431  | 2.212435  | -2.271544 |
| H  | 1.839731  | 2.981832  | -4.659895 |

S1.10.18 Bis(carboxylato)-substituted nickel(II) dipyridylmethane with BnO-substituent 1b

| 1b |           |           | 1b(py), BnO-side coordination |    |           |           |           |
|----|-----------|-----------|-------------------------------|----|-----------|-----------|-----------|
| C  | 1.338827  | 1.280341  | 0.090173                      | C  | -0.972152 | 4.225381  | 1.517792  |
| C  | 2.515539  | 2.038683  | -0.064549                     | C  | -1.853852 | 5.085605  | 2.205611  |
| C  | 3.751222  | 1.400781  | -0.237171                     | C  | -3.228080 | 4.806450  | 2.216435  |
| C  | 3.793733  | -0.000457 | -0.226993                     | C  | -3.704939 | 3.688021  | 1.520650  |
| C  | 2.600993  | -0.699986 | -0.061226                     | C  | -2.779617 | 2.868953  | 0.865634  |
| C  | 0.031021  | 2.015455  | 0.434908                      | C  | 0.501856  | 4.673407  | 1.350393  |
| C  | -1.290063 | 1.311965  | 0.075142                      | C  | 1.606324  | 3.617993  | 1.090176  |
| N  | 1.396853  | -0.072629 | 0.081451                      | N  | -1.449506 | 3.134400  | 0.883261  |
| N  | -1.379925 | -0.039333 | 0.066033                      | N  | 1.341164  | 2.477285  | 0.420253  |
| C  | -2.446748 | 2.097822  | -0.092696                     | C  | 2.937656  | 3.955259  | 1.413584  |
| C  | -3.695109 | 1.489189  | -0.279176                     | C  | 3.982725  | 3.104395  | 1.025857  |
| C  | -3.770851 | 0.089399  | -0.269381                     | C  | 3.686294  | 1.942950  | 0.300912  |
| C  | -2.596911 | -0.638081 | -0.090123                     | C  | 2.346129  | 1.659579  | 0.018936  |
| C  | 0.024685  | 2.226695  | 1.968039                      | C  | 0.524353  | 5.628688  | 0.133165  |
| O  | 0.050248  | 3.326260  | -0.127778                     | O  | 0.878856  | 5.485089  | 2.467385  |
| C  | 2.516920  | -2.212496 | 0.007709                      | C  | -3.220522 | 1.635409  | 0.058154  |
| C  | -2.549568 | -2.152187 | -0.020181                     | C  | 1.936151  | 0.418047  | -0.792110 |
| O  | 1.283589  | -2.627874 | 0.162765                      | O  | -2.237964 | 0.966856  | -0.460588 |
| O  | 3.519072  | -2.912603 | -0.066437                     | O  | -4.426482 | 1.402417  | -0.034521 |
| O  | -1.328285 | -2.596785 | 0.148471                      | O  | 0.654864  | 0.287056  | -0.943092 |
| O  | -3.567206 | -2.828279 | -0.105382                     | O  | 2.827647  | -0.313609 | -1.224800 |
| H  | 4.716295  | -0.589828 | -0.335629                     | H  | 4.444209  | 1.236046  | -0.066619 |
| H  | -4.705804 | -0.478068 | -0.388226                     | H  | -0.192262 | 6.457535  | 0.292722  |
| H  | 0.932141  | 2.782367  | 2.273659                      | H  | 0.239729  | 5.077580  | -0.783462 |
| H  | 0.009665  | 1.247118  | 2.483427                      | Ni | -0.435178 | 1.562252  | 0.120911  |
| Ni | -0.006733 | -1.291793 | 0.162887                      | N  | -0.457167 | 0.335697  | 1.723745  |
| C  | 0.058880  | 3.417243  | -1.551177                     | C  | -0.796738 | -0.942206 | 1.441210  |
| H  | -0.872393 | 2.804512  | 2.263079                      | C  | -0.863853 | -1.921964 | 2.439251  |
| H  | 2.437536  | 3.134343  | -0.032888                     | C  | -0.571366 | -1.569528 | 3.764606  |
| H  | 4.668061  | 1.995659  | -0.365014                     | C  | -0.220200 | -0.240805 | 4.048073  |
| H  | -2.343623 | 3.191358  | -0.060205                     | C  | -0.175710 | 0.680812  | 2.995644  |
| H  | -4.596135 | 2.105541  | -0.417293                     | H  | 0.017445  | 0.083872  | 5.071571  |
| C  | 0.065517  | 4.868984  | -1.977186                     | C  | 0.939261  | 4.843968  | 3.734586  |
| H  | -0.832001 | 2.902086  | -1.982632                     | H  | 1.541313  | 6.046316  | 0.001632  |
| H  | 0.951616  | 2.896700  | -1.972270                     | H  | -1.013350 | -1.155504 | 0.383733  |
| C  | 0.075283  | 5.177964  | -3.353488                     | H  | -1.143995 | -2.950217 | 2.168882  |
| C  | 0.081143  | 6.511487  | -3.784133                     | H  | -0.616421 | -2.320383 | 4.568089  |
| C  | 0.077467  | 7.556837  | -2.844583                     | H  | -4.767324 | 3.412592  | 1.451849  |
| C  | 0.067956  | 7.255924  | -1.474897                     | H  | -1.450842 | 5.977091  | 2.705970  |
| C  | 0.061984  | 5.919439  | -1.041023                     | H  | -3.919657 | 5.473171  | 2.754529  |
| H  | 0.054636  | 5.681208  | 0.031792                      | H  | 3.137304  | 4.893844  | 1.948900  |
| H  | 0.065161  | 8.068516  | -0.732008                     | H  | 5.022990  | 3.361621  | 1.278890  |
| H  | 0.082084  | 8.604241  | -3.182755                     | H  | 0.094003  | 1.735244  | 3.169198  |
| H  | 0.088666  | 6.737250  | -4.861525                     | C  | 1.384146  | 5.829314  | 4.793957  |
| H  | 0.078253  | 4.364083  | -4.097148                     | H  | 1.648503  | 3.981349  | 3.706096  |
|    |           |           |                               | H  | -0.058006 | 4.422738  | 4.010684  |
|    |           |           |                               | C  | 1.531204  | 5.389133  | 6.125643  |
|    |           |           |                               | C  | 1.940593  | 6.277490  | 7.129392  |
|    |           |           |                               | C  | 2.209364  | 7.621021  | 6.815770  |
|    |           |           |                               | C  | 2.064791  | 8.064831  | 5.493364  |
|    |           |           |                               | C  | 1.654092  | 7.175386  | 4.486095  |
|    |           |           |                               | H  | 1.323021  | 4.336662  | 6.380064  |
|    |           |           |                               | H  | 2.531337  | 8.318994  | 7.603572  |
|    |           |           |                               | H  | 2.051389  | 5.919273  | 8.164431  |
|    |           |           |                               | H  | 1.539430  | 7.518552  | 3.448444  |
|    |           |           |                               | H  | 2.273291  | 9.115526  | 5.238694  |





S1.10.19 Bis(carboxylato)-substituted nickel(II) dipyridylmethane with <sup>t</sup>BuBnO-substituent 1c

| 1c |           |           | 1c(py), <sup>t</sup> BuBnO-side coordination |    |           |           |           |
|----|-----------|-----------|----------------------------------------------|----|-----------|-----------|-----------|
| C  | 1.338534  | 1.276458  | 0.090163                                     | C  | -1.102225 | 4.218019  | 5.214170  |
| C  | 2.514944  | 2.035095  | -0.065540                                    | C  | -0.412229 | 5.074044  | 6.098266  |
| C  | 3.750507  | 1.397455  | -0.239596                                    | C  | -0.401778 | 4.790724  | 7.471603  |
| C  | 3.793291  | -0.003811 | -0.230111                                    | C  | -1.099863 | 3.672329  | 7.945284  |
| C  | 2.600856  | -0.703621 | -0.063526                                    | C  | -1.757057 | 2.857611  | 7.017702  |
| C  | 0.031089  | 2.011647  | 0.436212                                     | C  | -1.268364 | 4.671083  | 3.741529  |
| C  | -1.290121 | 1.307895  | 0.077347                                     | C  | -1.530656 | 3.619335  | 2.634073  |
| N  | 1.396783  | -0.076465 | 0.080744                                     | N  | -1.739247 | 3.127165  | 5.688418  |
| N  | -1.380034 | -0.043363 | 0.067851                                     | N  | -2.205597 | 2.480726  | 2.895583  |
| C  | -2.446874 | 2.093867  | -0.089595                                    | C  | -1.204256 | 3.958496  | 1.303955  |
| C  | -3.695340 | 1.485300  | -0.275241                                    | C  | -1.594548 | 3.111898  | 0.256407  |
| C  | -3.771155 | 0.085480  | -0.265776                                    | C  | -2.324892 | 1.952845  | 0.549070  |
| C  | -2.597124 | -0.642095 | -0.087681                                    | C  | -2.609276 | 1.667170  | 1.888213  |
| C  | 0.026011  | 2.221557  | 1.969617                                     | C  | -2.484819 | 5.627690  | 3.721959  |
| O  | 0.049776  | 3.322252  | -0.125534                                    | O  | -0.151086 | 5.482458  | 3.367564  |
| C  | 2.517027  | -2.216144 | 0.004542                                     | C  | -2.567230 | 1.624591  | 7.454958  |
| C  | -2.549697 | -2.156194 | -0.018473                                    | C  | -3.425497 | 0.427851  | 2.294479  |
| O  | 1.283902  | -2.631804 | 0.160375                                     | O  | -3.088293 | 0.960616  | 6.470513  |
| O  | 3.519144  | -2.916198 | -0.071535                                    | O  | -2.659809 | 1.387657  | 8.660208  |
| O  | -1.328260 | -2.600892 | 0.148704                                     | O  | -3.576549 | 0.293314  | 3.575408  |
| O  | -3.567339 | -2.832379 | -0.103721                                    | O  | -3.861829 | -0.299078 | 1.400828  |
| H  | 4.715817  | -0.592992 | -0.340029                                    | H  | -2.694730 | 1.249535  | -0.211055 |
| H  | -4.706193 | -0.481936 | -0.384158                                    | H  | -2.324211 | 6.454167  | 4.441069  |
| H  | 0.933647  | 2.777214  | 2.274720                                     | H  | -3.402230 | 5.076854  | 4.004575  |
| H  | 0.011431  | 1.241681  | 2.484472                                     | Ni | -2.507119 | 1.561056  | 4.669090  |
| Ni | -0.006651 | -1.295779 | 0.162716                                     | N  | -0.907711 | 0.330221  | 4.684571  |
| C  | 0.057369  | 3.413048  | -1.549876                                    | C  | -1.193093 | -0.948221 | 5.019671  |
| H  | -0.870769 | 2.799327  | 2.265649                                     | C  | -0.197480 | -1.930757 | 5.081877  |
| H  | 2.436294  | 3.130717  | -0.033868                                    | C  | 1.128405  | -1.580559 | 4.789043  |
| H  | 4.667112  | 1.992529  | -0.368255                                    | C  | 1.414812  | -0.251259 | 4.442518  |
| H  | -2.343181 | 3.187368  | -0.057452                                    | C  | 0.364700  | 0.673246  | 4.402832  |
| H  | -4.596440 | 2.101702  | -0.412700                                    | H  | 2.438789  | 0.071804  | 4.204746  |
| C  | 0.064417  | 4.864192  | -1.974627                                    | C  | 1.116680  | 4.840491  | 3.305150  |
| H  | -0.834007 | 2.897107  | -1.979487                                    | H  | -2.615361 | 6.048723  | 2.706270  |
| H  | 0.949441  | 2.890937  | -1.970507                                    | H  | -2.250865 | -1.159611 | 5.236729  |
| C  | 0.076226  | 5.185094  | -3.344453                                    | H  | -0.470120 | -2.959372 | 5.358480  |
| C  | 0.082564  | 6.520403  | -3.772495                                    | H  | 1.930020  | -2.333635 | 4.830241  |
| C  | 0.077513  | 7.590760  | -2.852434                                    | H  | -1.168864 | 3.393766  | 9.006834  |
| C  | 0.065706  | 7.252688  | -1.481595                                    | H  | 0.090076  | 5.965369  | 5.697309  |
| C  | 0.059290  | 5.920239  | -1.045234                                    | H  | 0.137999  | 5.454109  | 8.165087  |
| H  | 0.050476  | 5.690872  | 0.029677                                     | H  | -0.664391 | 4.895136  | 1.107466  |
| H  | 0.061559  | 8.050087  | -0.722200                                    | H  | -1.339140 | 3.370534  | -0.782936 |
| H  | 0.091759  | 6.720414  | -4.852707                                    | H  | 0.540679  | 1.728240  | 4.136906  |
| H  | 0.080629  | 4.379227  | -4.097028                                    | C  | 2.173202  | 5.826615  | 2.858058  |
| C  | 0.084262  | 9.070167  | -3.287153                                    | H  | 1.085052  | 3.977470  | 2.596364  |
| C  | 0.101077  | 9.225464  | -4.819117                                    | H  | 1.393275  | 4.418827  | 4.302034  |
| H  | 1.003513  | 8.767536  | -5.272652                                    | C  | 3.509363  | 5.407263  | 2.726461  |
| H  | 0.105248  | 10.301088 | -5.088191                                    | C  | 4.509240  | 6.299598  | 2.312592  |
| H  | -0.792554 | 8.769918  | -5.292083                                    | C  | 4.216898  | 7.647524  | 2.013341  |
| C  | -1.184239 | 9.768763  | -2.741234                                    | C  | 2.871674  | 8.053656  | 2.150640  |
| H  | -2.103553 | 9.294890  | -3.141622                                    | C  | 1.866807  | 7.167728  | 2.563936  |
| H  | -1.193923 | 10.838911 | -3.035679                                    | H  | 3.781290  | 4.362227  | 2.950388  |
| H  | -1.237337 | 9.725649  | -1.634981                                    | H  | 5.538203  | 5.924878  | 2.224527  |
| C  | 1.342548  | 9.765311  | -2.713764                                    | H  | 0.828348  | 7.513784  | 2.662544  |
| H  | 1.361912  | 10.835248 | -3.008380                                    | H  | 2.590303  | 9.095022  | 1.929540  |
| H  | 2.269069  | 9.288461  | -3.093434                                    | C  | 5.287935  | 8.656721  | 1.553330  |
| H  | 1.371190  | 9.722771  | -1.606581                                    | C  | 6.690125  | 8.023938  | 1.479332  |
|    |           |           |                                              | H  | 7.025910  | 7.643377  | 2.465388  |
|    |           |           |                                              | H  | 7.427693  | 8.782911  | 1.148634  |
|    |           |           |                                              | H  | 6.730044  | 7.186146  | 0.753831  |
|    |           |           |                                              | C  | 5.340163  | 9.838853  | 2.550783  |
|    |           |           |                                              | H  | 5.605396  | 9.490214  | 3.569606  |

|   |          |           |           |   |            |          |           |
|---|----------|-----------|-----------|---|------------|----------|-----------|
| H | 4.368231 | 10.367332 | 2.618499  | C | -9.021869  | 3.722525 | -1.622886 |
| H | 6.102601 | 10.579958 | 2.232531  | C | -9.620212  | 4.582041 | -0.483384 |
| C | 4.918540 | 9.186123  | 0.146680  | H | -8.951622  | 5.419908 | -0.201247 |
| H | 3.930581 | 9.688410  | 0.139415  | H | -9.796288  | 3.971315 | 0.425449  |
| H | 5.672445 | 9.923292  | -0.199957 | H | -10.591291 | 5.018874 | -0.796757 |
| H | 4.881754 | 8.359934  | -0.592251 | C | -8.803102  | 4.606225 | -2.874187 |

**1c(py), Me-side coordination**

|    |           |           |           |
|----|-----------|-----------|-----------|
| C  | -1.852889 | -0.057089 | 1.676274  |
| C  | -2.717529 | 0.261156  | 2.743809  |
| C  | -2.185346 | 0.532427  | 4.012685  |
| C  | -0.798634 | 0.478897  | 4.195527  |
| C  | 0.001997  | 0.121353  | 3.105130  |
| C  | -2.478200 | -0.415134 | 0.306079  |
| C  | -1.653056 | -0.118376 | -0.972218 |
| N  | -0.522989 | -0.150860 | 1.884373  |
| N  | -0.310812 | -0.264324 | -0.981944 |
| C  | -2.341680 | 0.188945  | -2.164080 |
| C  | -1.622882 | 0.379829  | -3.352921 |
| C  | -0.228812 | 0.258422  | -3.334621 |
| C  | 0.393066  | -0.070091 | -2.125209 |
| C  | -2.783085 | -1.929373 | 0.316700  |
| O  | -3.755511 | 0.221135  | 0.193601  |
| C  | 1.529223  | 0.002599  | 3.237053  |
| C  | 1.918501  | -0.233040 | -2.029688 |
| O  | 2.120924  | -0.386478 | 2.152486  |
| O  | 2.041664  | 0.268840  | 4.325857  |
| O  | 2.340918  | -0.543539 | -0.844681 |
| O  | 2.587198  | -0.068538 | -3.051792 |
| H  | 0.415085  | 0.399072  | -4.214829 |
| H  | -3.438093 | -2.173635 | 1.175479  |
| H  | -1.840610 | -2.501964 | 0.404255  |
| Ni | 0.953320  | -0.674310 | 0.571137  |
| C  | -3.777012 | 1.647236  | 0.165471  |
| H  | -3.295734 | -2.215036 | -0.622393 |
| H  | -0.293241 | 0.688450  | 5.149445  |
| H  | -3.801054 | 0.279905  | 2.564061  |
| H  | -2.856645 | 0.783272  | 4.848631  |
| H  | -3.436905 | 0.269680  | -2.147160 |
| H  | -2.157314 | 0.622470  | -4.284481 |
| N  | 0.999649  | -2.686048 | 0.673455  |
| C  | 0.986379  | -3.309355 | 1.872220  |
| C  | 1.196341  | -4.686773 | 2.001359  |
| C  | 1.435157  | -5.448998 | 0.848508  |
| C  | 1.456220  | -4.797475 | -0.393256 |
| C  | 1.237466  | -3.415963 | -0.438636 |
| H  | 0.816295  | -2.673633 | 2.753231  |
| H  | 1.610058  | -6.533358 | 0.917710  |
| H  | 1.180435  | -5.146330 | 3.000170  |
| H  | 1.271562  | -2.861688 | -1.387481 |
| H  | 1.649840  | -5.346150 | -1.326273 |
| C  | -5.130380 | 2.138046  | -0.297225 |
| H  | -2.983004 | 2.041834  | -0.511171 |
| H  | -3.552964 | 2.064085  | 1.175751  |
| C  | -5.370129 | 3.525061  | -0.384198 |
| C  | -6.610382 | 4.011579  | -0.808462 |
| C  | -7.416567 | 1.760466  | -1.070147 |
| C  | -7.669273 | 3.142475  | -1.164254 |
| H  | -4.572350 | 4.237351  | -0.115985 |
| C  | -6.171729 | 1.263317  | -0.644201 |
| H  | -8.202056 | 1.037590  | -1.331213 |
| H  | -6.005071 | 0.178980  | -0.574602 |
| H  | -6.755432 | 5.101708  | -0.862549 |

|   |            |          |           |
|---|------------|----------|-----------|
| C | -9.021869  | 3.722525 | -1.622886 |
| C | -9.620212  | 4.582041 | -0.483384 |
| H | -8.951622  | 5.419908 | -0.201247 |
| H | -9.796288  | 3.971315 | 0.425449  |
| H | -10.591291 | 5.018874 | -0.796757 |
| C | -8.803102  | 4.606225 | -2.874187 |
| H | -8.109490  | 5.447020 | -2.672891 |
| H | -9.765898  | 5.041599 | -3.214017 |
| H | -8.380421  | 4.014041 | -3.711257 |
| C | -10.036274 | 2.620511 | -1.980794 |
| H | -10.991379 | 3.080594 | -2.305763 |
| H | -10.262440 | 1.966781 | -1.113959 |
| H | -9.677269  | 1.979771 | -2.811771 |

**1c(py)<sub>2</sub>**

|    |           |           |           |
|----|-----------|-----------|-----------|
| C  | -0.124465 | 4.222687  | 2.674640  |
| C  | 0.498893  | 4.968598  | 3.698073  |
| C  | 0.488056  | 4.488503  | 5.015066  |
| C  | -0.162490 | 3.277954  | 5.291323  |
| C  | -0.776958 | 2.593322  | 4.236245  |
| C  | -0.190522 | 4.847829  | 1.255946  |
| C  | -0.260830 | 3.919195  | 0.014696  |
| N  | -0.754505 | 3.065448  | 2.964267  |
| N  | -0.872344 | 2.717558  | 0.062086  |
| C  | 0.221438  | 4.423914  | -1.211973 |
| C  | 0.088851  | 3.658813  | -2.379042 |
| C  | -0.531367 | 2.406155  | -2.304050 |
| C  | -1.006204 | 1.969133  | -1.061766 |
| C  | -1.444045 | 5.750067  | 1.218766  |
| O  | 0.915587  | 5.748022  | 1.096088  |
| C  | -1.540490 | 1.277320  | 4.486938  |
| C  | -1.738275 | 0.618769  | -0.927601 |
| O  | -2.102239 | 0.780788  | 3.434566  |
| O  | -1.567726 | 0.842274  | 5.642567  |
| O  | -2.193384 | 0.377510  | 0.257279  |
| O  | -1.846156 | -0.077348 | -1.942319 |
| H  | -0.680194 | 1.737543  | -3.164331 |
| H  | -1.397889 | 6.488462  | 2.042842  |
| H  | -2.354718 | 5.133143  | 1.334549  |
| Ni | -1.581122 | 1.704928  | 1.686148  |
| N  | 0.185694  | 0.479838  | 1.777210  |
| C  | -0.048084 | -0.832285 | 1.987321  |
| C  | 0.989596  | -1.772373 | 2.045570  |
| C  | 2.312598  | -1.338418 | 1.880037  |
| C  | 2.550767  | 0.026559  | 1.661446  |
| C  | 1.454193  | 0.897547  | 1.618066  |
| H  | 3.570175  | 0.416817  | 1.525598  |
| C  | 2.218653  | 5.176558  | 1.085668  |
| H  | -1.491120 | 6.288021  | 0.251918  |
| H  | -1.103508 | -1.114030 | 2.115287  |
| H  | 0.753024  | -2.832040 | 2.219501  |
| H  | 3.148054  | -2.054141 | 1.920562  |
| H  | -0.228437 | 2.826981  | 6.292107  |
| H  | 0.978668  | 5.924526  | 3.447848  |
| H  | 0.972163  | 5.065200  | 5.816154  |
| H  | 0.686708  | 5.418816  | -1.234520 |
| H  | 0.466412  | 4.047356  | -3.337704 |
| H  | 1.596400  | 1.977985  | 1.447797  |
| N  | -3.535925 | 2.577295  | 1.648056  |
| C  | -4.127738 | 2.978011  | 2.791862  |
| C  | -5.456275 | 3.419166  | 2.843301  |
| C  | -6.208898 | 3.441354  | 1.660277  |
| C  | -5.596465 | 3.019192  | 0.471745  |

|   |           |           |           |
|---|-----------|-----------|-----------|
| C | -4.262079 | 2.593510  | 0.511788  |
| H | -3.513747 | 2.928295  | 3.702450  |
| H | -7.257593 | 3.776061  | 1.665960  |
| H | -5.889404 | 3.730643  | 3.805017  |
| H | -3.756296 | 2.232260  | -0.394753 |
| H | -6.142566 | 3.007100  | -0.482780 |
| C | 3.261786  | 6.264410  | 0.960637  |
| H | 2.326967  | 4.456234  | 0.239434  |
| H | 2.400805  | 4.590961  | 2.018687  |
| C | 4.625198  | 5.918939  | 0.936232  |
| C | 5.618480  | 6.902402  | 0.823991  |
| C | 5.292965  | 8.272378  | 0.730591  |
| C | 3.920598  | 8.603882  | 0.754032  |
| C | 2.921719  | 7.626099  | 0.866341  |
| H | 1.861342  | 7.915474  | 0.881315  |
| H | 3.611538  | 9.658631  | 0.682513  |
| H | 6.669280  | 6.581630  | 0.810486  |
| H | 4.923805  | 4.859729  | 1.007295  |
| C | 6.357316  | 9.380850  | 0.606689  |
| C | 7.790251  | 8.815975  | 0.619677  |
| H | 7.972543  | 8.126566  | -0.229591 |
| H | 8.012642  | 8.271885  | 1.560100  |
| H | 8.521462  | 9.645241  | 0.535336  |
| C | 6.146805  | 10.142775 | -0.723813 |
| H | 6.894822  | 10.956306 | -0.827986 |
| H | 5.140351  | 10.603374 | -0.781394 |
| H | 6.256090  | 9.462724  | -1.593072 |
| C | 6.213022  | 10.365237 | 1.792024  |
| H | 6.969173  | 11.174173 | 1.716596  |
| H | 6.360742  | 9.846624  | 2.761127  |
| H | 5.213128  | 10.842761 | 1.814851  |



|   |          |           |          |   |           |           |           |
|---|----------|-----------|----------|---|-----------|-----------|-----------|
| H | 0.601913 | 7.509678  | 3.282585 | C | 1.212958  | -4.654301 | 2.035778  |
| C | 5.755428 | 5.798547  | 2.602566 | C | 1.409427  | -5.444915 | 0.894113  |
| C | 5.942713 | 4.301355  | 2.910472 | C | 1.391748  | -4.823069 | -0.362822 |
| H | 5.324415 | 3.661270  | 2.248661 | C | 1.177596  | -3.441939 | -0.433883 |
| H | 7.001988 | 4.014646  | 2.751288 | H | 0.867142  | -2.622132 | 2.751804  |
| H | 5.688513 | 4.059695  | 3.962600 | H | 1.581659  | -6.528248 | 0.983281  |
| C | 6.172578 | 6.046705  | 1.133140 | H | 1.228573  | -5.089940 | 3.045256  |
| H | 5.529866 | 5.473591  | 0.434242 | H | 1.182844  | -2.910308 | -1.396159 |
| H | 7.224101 | 5.730646  | 0.970243 | H | 1.551578  | -5.394691 | -1.288431 |
| H | 6.097931 | 7.117428  | 0.857250 | C | -5.150495 | 2.141488  | -0.254582 |
| C | 6.681002 | 6.606353  | 3.543718 | H | -2.998253 | 2.039167  | -0.423825 |
| H | 7.737375 | 6.292176  | 3.411648 | H | -3.601133 | 2.082445  | 1.250819  |
| H | 6.405929 | 6.447425  | 4.606268 | C | -5.365015 | 3.529379  | -0.355771 |
| H | 6.628742 | 7.694982  | 3.342239 | C | -6.591707 | 4.043311  | -0.813331 |
| C | 2.333574 | 9.583646  | 2.448655 | C | -7.420561 | 1.723313  | -1.070835 |
| C | 3.208688 | 10.467238 | 3.369433 | C | -7.597953 | 3.117141  | -1.165502 |
| H | 4.290782 | 10.293943 | 3.204019 | H | -4.550627 | 4.211482  | -0.070214 |
| H | 3.009051 | 11.542266 | 3.178728 | C | -6.175118 | 1.248930  | -0.607349 |
| H | 2.994814 | 10.262971 | 4.438316 | H | -5.980110 | 0.174597  | -0.505193 |
| C | 2.658102 | 9.902237  | 0.969455 | H | -8.563439 | 3.503618  | -1.526784 |
| H | 2.038874 | 9.287698  | 0.284643 | C | -6.864434 | 5.556914  | -0.943334 |
| H | 2.455040 | 10.971045 | 0.749390 | C | -5.663858 | 6.407388  | -0.487793 |
| H | 3.722092 | 9.706933  | 0.727431 | H | -4.758075 | 6.207500  | -1.095507 |
| C | 0.855907 | 9.935279  | 2.705436 | H | -5.411041 | 6.230523  | 0.577414  |
| H | 0.171941 | 9.357363  | 2.051491 | H | -5.903426 | 7.484441  | -0.597220 |
| H | 0.562442 | 9.750243  | 3.758697 | C | -7.165742 | 5.894688  | -2.423130 |
| H | 0.683871 | 11.010716 | 2.497236 | H | -6.303051 | 5.642450  | -3.072899 |

**1d(py), Me-side coordination**

|    |           |           |           |   |            |           |           |
|----|-----------|-----------|-----------|---|------------|-----------|-----------|
| C  | -1.826154 | -0.027332 | 1.708264  | C | -8.084346  | 5.935046  | -0.069395 |
| C  | -2.651938 | 0.307955  | 2.800946  | H | -8.999327  | 5.389719  | -0.375633 |
| C  | -2.074834 | 0.598928  | 4.045549  | H | -7.895641  | 5.703722  | 0.998727  |
| C  | -0.682446 | 0.548164  | 4.179385  | H | -8.298510  | 7.020911  | -0.152497 |
| C  | 0.078632  | 0.172783  | 3.066851  | C | -8.570754  | 0.773360  | -1.467638 |
| C  | -2.499933 | -0.406207 | 0.366999  | C | -9.808032  | 1.068234  | -0.586177 |
| C  | -1.719137 | -0.128090 | -0.943108 | H | -10.648026 | 0.396016  | -0.859478 |
| N  | -0.489645 | -0.118948 | 1.870270  | H | -9.578668  | 0.911760  | 0.487517  |
| N  | -0.379392 | -0.288822 | -0.998701 | H | -10.162740 | 2.111534  | -0.705066 |
| C  | -2.445972 | 0.175192  | -2.113044 | C | -8.932741  | 1.000127  | -2.955062 |
| C  | -1.767759 | 0.344121  | -3.328745 | H | -8.064053  | 0.791945  | -3.612473 |
| C  | -0.375650 | 0.205034  | -3.359083 | H | -9.762245  | 0.328256  | -3.259674 |
| C  | 0.285259  | -0.116325 | -2.168586 | H | -9.257684  | 2.042011  | -3.148412 |
| C  | -2.801505 | -1.920581 | 0.410503  | C | -8.190873  | -0.708152 | -1.283729 |
| O  | -3.780548 | 0.227115  | 0.290162  | H | -9.044463  | -1.353854 | -1.573662 |
| C  | 1.609643  | 0.055904  | 3.145645  | H | -7.939073  | -0.943015 | -0.229738 |
| C  | 1.811307  | -0.294769 | -2.125351 | H | -7.326819  | -0.996966 | -1.915966 |
| O  | 2.161863  | -0.353332 | 2.047806  |   |            |           |           |
| O  | 2.160991  | 0.341999  | 4.210188  |   |            |           |           |
| O  | 2.273035  | -0.590130 | -0.951168 |   |            |           |           |
| O  | 2.444515  | -0.155106 | -3.173417 |   |            |           |           |
| H  | 0.237931  | 0.327151  | -4.263380 |   |            |           |           |
| H  | -3.423632 | -2.153344 | 1.296503  |   |            |           |           |
| H  | -1.855405 | -2.490672 | 0.470703  |   |            |           |           |
| Ni | 0.936845  | -0.675817 | 0.517062  |   |            |           |           |
| C  | -3.805442 | 1.653333  | 0.241729  |   |            |           |           |
| H  | -3.348351 | -2.220004 | -0.504714 |   |            |           |           |
| H  | -0.143113 | 0.772832  | 5.111015  |   |            |           |           |
| H  | -3.741163 | 0.323696  | 2.660006  |   |            |           |           |
| H  | -2.715857 | 0.862792  | 4.901038  |   |            |           |           |
| H  | -3.538826 | 0.270946  | -2.059323 |   |            |           |           |
| H  | -2.332307 | 0.583718  | -4.243181 |   |            |           |           |
| N  | 0.980384  | -2.684557 | 0.667860  |   |            |           |           |
| C  | 1.004809  | -3.279249 | 1.880865  |   |            |           |           |

|                           |           |           |           |                                                                 |           |           |           |
|---------------------------|-----------|-----------|-----------|-----------------------------------------------------------------|-----------|-----------|-----------|
| <b>1d(py)<sub>2</sub></b> |           |           | H         | 6.029649                                                        | 8.997814  | 0.664100  |           |
| C                         | -0.117632 | 4.229594  | 2.666108  | H                                                               | 4.881540  | 4.838255  | 0.990222  |
| C                         | 0.509256  | 4.976470  | 3.686680  | C                                                               | 7.139588  | 6.508375  | 0.790429  |
| C                         | 0.496119  | 4.499115  | 5.004690  | C                                                               | 7.372752  | 4.989744  | 0.897442  |
| C                         | -0.152031 | 3.290314  | 5.284858  | H                                                               | 6.907181  | 4.438292  | 0.055354  |
| C                         | -0.769256 | 2.604246  | 4.232354  | H                                                               | 6.974006  | 4.575207  | 1.845669  |
| C                         | -0.187244 | 4.852156  | 1.246433  | H                                                               | 8.459972  | 4.773082  | 0.873205  |
| C                         | -0.258232 | 3.920892  | 0.007223  | C                                                               | 7.857733  | 7.193125  | 1.977899  |
| N                         | -0.748660 | 3.073784  | 2.959395  | H                                                               | 7.441396  | 6.849579  | 2.946728  |
| N                         | -0.867860 | 2.718440  | 0.058015  | H                                                               | 7.758023  | 8.296313  | 1.941941  |
| C                         | 0.221397  | 4.423787  | -1.221212 | H                                                               | 8.941584  | 6.954189  | 1.965552  |
| C                         | 0.088341  | 3.655948  | -2.386412 | C                                                               | 7.758542  | 7.001299  | -0.539544 |
| C                         | -0.529643 | 2.402382  | -2.307855 | H                                                               | 8.840535  | 6.756529  | -0.578525 |
| C                         | -1.002112 | 1.967328  | -1.063986 | H                                                               | 7.658787  | 8.098498  | -0.660641 |
| C                         | -1.443022 | 5.751439  | 1.210067  | H                                                               | 7.266581  | 6.520952  | -1.409760 |
| O                         | 0.916107  | 5.754309  | 1.082843  | C                                                               | 3.549841  | 10.134534 | 0.670942  |
| C                         | -1.533436 | 1.289428  | 4.487047  | C                                                               | 4.089850  | 10.702815 | -0.663443 |
| C                         | -1.732130 | 0.616276  | -0.925819 | H                                                               | 5.189517  | 10.591216 | -0.746157 |
| O                         | -2.095222 | 0.789784  | 3.436158  | H                                                               | 3.855222  | 11.784394 | -0.748461 |
| O                         | -1.560803 | 0.857781  | 5.643974  | H                                                               | 3.633187  | 10.183526 | -1.530556 |
| O                         | -2.186177 | 0.377495  | 0.259978  | C                                                               | 4.203974  | 10.887680 | 1.853833  |
| O                         | -1.839639 | -0.082753 | -1.938596 | H                                                               | 5.307174  | 10.781056 | 1.853429  |
| H                         | -0.678518 | 1.731651  | -3.166475 | H                                                               | 3.972085  | 11.971866 | 1.799971  |
| H                         | -1.397068 | 6.491070  | 2.033048  | H                                                               | 3.829838  | 10.504722 | 2.825124  |
| H                         | -2.352209 | 5.132772  | 1.328056  | C                                                               | 2.030537  | 10.382530 | 0.721810  |
| Ni                        | -1.575033 | 1.709603  | 1.685072  | H                                                               | 1.824184  | 11.469963 | 0.653475  |
| N                         | 0.193228  | 0.486815  | 1.779152  | H                                                               | 1.582905  | 10.018398 | 1.668715  |
| C                         | -0.038857 | -0.824979 | 1.993099  | H                                                               | 1.501853  | 9.890867  | -0.119726 |
| C                         | 1.000056  | -1.763510 | 2.054377  | <b>1d(dcm), <sup>t</sup>Bu<sub>2</sub>BnO-side coordination</b> |           |           |           |
| C                         | 2.322519  | -1.328279 | 1.887825  | C                                                               | -1.257701 | 4.221636  | 5.725846  |
| C                         | 2.558906  | 0.036343  | 1.665138  | C                                                               | -0.641239 | 5.127966  | 6.614290  |
| C                         | 1.461194  | 0.905771  | 1.618942  | C                                                               | -0.643732 | 4.863396  | 7.990618  |
| H                         | 3.577797  | 0.427623  | 1.528299  | C                                                               | -1.276050 | 3.706608  | 8.463859  |
| C                         | 2.221247  | 5.187019  | 1.069810  | C                                                               | -1.861638 | 2.844302  | 7.532643  |
| H                         | -1.492488 | 6.288114  | 0.242627  | C                                                               | -1.397230 | 4.643721  | 4.242475  |
| H                         | -1.093942 | -1.107730 | 2.121676  | C                                                               | -1.569943 | 3.563232  | 3.146067  |
| H                         | 0.764857  | -2.822962 | 2.231467  | N                                                               | -1.841202 | 3.102341  | 6.201181  |
| H                         | 3.158918  | -2.042767 | 1.930721  | N                                                               | -2.193183 | 2.394359  | 3.399609  |
| H                         | -0.216975 | 2.841700  | 6.286764  | C                                                               | -1.210357 | 3.899200  | 1.823696  |
| H                         | 0.990463  | 5.930890  | 3.433501  | C                                                               | -1.513220 | 3.018625  | 0.776074  |
| H                         | 0.986894  | 5.076573  | 5.803608  | C                                                               | -2.185340 | 1.822801  | 1.059429  |
| H                         | 0.685075  | 5.419377  | -1.246311 | C                                                               | -2.503453 | 1.542084  | 2.391178  |
| H                         | 0.463858  | 4.043005  | -3.346485 | C                                                               | -2.657496 | 5.539466  | 4.166393  |
| H                         | 1.602089  | 1.985872  | 1.445482  | O                                                               | -0.307714 | 5.496982  | 3.890715  |
| N                         | -3.530752 | 2.579822  | 1.645361  | C                                                               | -2.575215 | 1.557399  | 7.966742  |
| C                         | -4.122181 | 2.983525  | 2.788313  | C                                                               | -3.232898 | 0.252622  | 2.789439  |
| C                         | -5.451139 | 3.423474  | 2.839273  | O                                                               | -3.030757 | 0.847246  | 6.974665  |
| C                         | -6.204577 | 3.441203  | 1.656692  | O                                                               | -2.657985 | 1.302586  | 9.166456  |
| C                         | -5.592518 | 3.015947  | 0.469072  | O                                                               | -3.408806 | 0.121950  | 4.073215  |
| C                         | -4.257669 | 2.591743  | 0.509544  | O                                                               | -3.578570 | -0.529031 | 1.905849  |
| H                         | -3.507457 | 2.937359  | 3.698592  | H                                                               | -2.477721 | 1.086418  | 0.297060  |
| H                         | -7.253603 | 3.774883  | 1.662037  | H                                                               | -2.561796 | 6.382613  | 4.877477  |
| H                         | -5.883930 | 3.737551  | 3.800297  | H                                                               | -3.557386 | 4.949337  | 4.425457  |
| H                         | -3.752082 | 2.228214  | -0.396195 | Ni                                                              | -2.542992 | 1.510795  | 5.178751  |
| H                         | -6.139249 | 3.000349  | -0.485042 | C                                                               | 0.990747  | 4.906877  | 3.889689  |
| C                         | 3.266221  | 6.276514  | 0.951773  | H                                                               | -2.771704 | 5.940691  | 3.140872  |
| H                         | 2.331180  | 4.471693  | 0.219736  | H                                                               | -1.341385 | 3.432788  | 9.526749  |
| H                         | 2.403638  | 4.596428  | 1.999510  | H                                                               | -0.181186 | 6.040522  | 6.210827  |
| C                         | 4.624297  | 5.906032  | 0.925471  | H                                                               | -0.161381 | 5.567003  | 8.686562  |
| C                         | 5.640145  | 6.873264  | 0.820798  | H                                                               | -0.709500 | 4.858624  | 1.634915  |
| C                         | 5.247248  | 8.227149  | 0.742446  | H                                                               | -1.231737 | 3.275983  | -0.256699 |
| C                         | 3.899075  | 8.633702  | 0.763855  | C                                                               | 2.022290  | 5.911841  | 3.423421  |
| C                         | 2.911016  | 7.632255  | 0.869975  |                                                                 |           |           |           |
| H                         | 1.844686  | 7.887778  | 0.890698  |                                                                 |           |           |           |

|                                      |           |           |           |                            |            |           |           |
|--------------------------------------|-----------|-----------|-----------|----------------------------|------------|-----------|-----------|
| H                                    | 1.012918  | 4.008766  | 3.227687  | O                          | 2.731019   | -0.705850 | -2.833158 |
| H                                    | 1.253534  | 4.543834  | 4.912310  | H                          | 0.661933   | -0.256077 | -4.209330 |
| C                                    | 3.354774  | 5.485085  | 3.266594  | H                          | -3.659965  | -2.222016 | 1.020871  |
| C                                    | 4.358717  | 6.377016  | 2.847661  | H                          | -2.030242  | -2.647390 | 0.378935  |
| C                                    | 3.979470  | 7.712329  | 2.589460  | Ni                         | 0.813036   | -0.756420 | 0.681418  |
| C                                    | 2.656775  | 8.173324  | 2.735177  | C                          | -3.765535  | 1.555562  | -0.216339 |
| C                                    | 1.680272  | 7.247667  | 3.158997  | H                          | -3.397467  | -2.359319 | -0.758948 |
| H                                    | 3.601448  | 4.434029  | 3.477874  | H                          | -0.796608  | 0.519519  | 5.150908  |
| H                                    | 4.751779  | 8.424068  | 2.259304  | H                          | -4.057001  | 0.297337  | 2.242077  |
| H                                    | 0.633944  | 7.549447  | 3.288225  | H                          | -3.304740  | 0.767322  | 4.601091  |
| C                                    | 5.830207  | 5.948524  | 2.664409  | H                          | -3.327912  | -0.062344 | -2.424038 |
| C                                    | 6.049294  | 4.459410  | 2.990064  | H                          | -1.885400  | 0.040402  | -4.488488 |
| H                                    | 5.451433  | 3.797917  | 2.330632  | C                          | -5.146481  | 2.103613  | -0.506837 |
| H                                    | 7.116120  | 4.195349  | 2.842741  | H                          | -3.059875  | 1.867517  | -1.022078 |
| H                                    | 5.792026  | 4.222555  | 4.042420  | H                          | -3.374054  | 2.005618  | 0.726729  |
| C                                    | 6.254788  | 6.191165  | 1.196218  | C                          | -5.293243  | 3.493323  | -0.679686 |
| H                                    | 5.632425  | 5.595417  | 0.497824  | C                          | -6.551361  | 4.062531  | -0.947174 |
| H                                    | 7.314824  | 5.898003  | 1.046441  | C                          | -7.547873  | 1.795954  | -0.866976 |
| H                                    | 6.158005  | 7.256847  | 0.907820  | C                          | -7.657984  | 3.190019  | -1.034216 |
| C                                    | 6.727379  | 6.788281  | 3.605158  | H                          | -4.401411  | 4.132939  | -0.603232 |
| H                                    | 7.792379  | 6.500282  | 3.483717  | C                          | -6.268310  | 1.264686  | -0.601057 |
| H                                    | 6.448450  | 6.631216  | 4.666979  | H                          | -6.120239  | 0.186890  | -0.463426 |
| H                                    | 6.648427  | 7.873435  | 3.393669  | H                          | -8.649629  | 3.619917  | -1.244085 |
| C                                    | 2.321573  | 9.648963  | 2.430653  | C                          | -6.754418  | 5.578792  | -1.150554 |
| C                                    | 3.171057  | 10.566995 | 3.341656  | C                          | -5.439949  | 6.368001  | -1.003271 |
| H                                    | 4.257658  | 10.416891 | 3.183458  | H                          | -4.683448  | 6.057915  | -1.752538 |
| H                                    | 2.947000  | 11.634054 | 3.134132  | H                          | -4.994989  | 6.250415  | 0.005809  |
| H                                    | 2.957290  | 10.373474 | 4.412550  | H                          | -5.630992  | 7.449534  | -1.155594 |
| C                                    | 2.646647  | 9.951458  | 0.948173  | C                          | -7.314821  | 5.831304  | -2.570821 |
| H                                    | 2.045481  | 9.311889  | 0.270200  | H                          | -6.612846  | 5.463738  | -3.346772 |
| H                                    | 2.420642  | 11.011667 | 0.709517  | H                          | -7.472586  | 6.917187  | -2.737863 |
| H                                    | 3.716063  | 9.776570  | 0.714824  | H                          | -8.287211  | 5.323367  | -2.729868 |
| C                                    | 0.834799  | 9.970522  | 2.674275  | C                          | -7.757711  | 6.108559  | -0.098327 |
| H                                    | 0.167903  | 9.366457  | 2.026278  | H                          | -8.745224  | 5.612163  | -0.179516 |
| H                                    | 0.540060  | 9.795626  | 3.728975  | H                          | -7.380349  | 5.941755  | 0.931099  |
| H                                    | 0.638958  | 11.038197 | 2.447880  | H                          | -7.919133  | 7.198477  | -0.232079 |
| Cl                                   | -0.487954 | 0.104887  | 5.255751  | C                          | -8.805735  | 0.908680  | -0.981703 |
| C                                    | -1.414184 | -1.409792 | 5.763567  | C                          | -9.841839  | 1.347097  | 0.080712  |
| Cl                                   | -0.332243 | -2.777240 | 5.986683  | H                          | -10.759067 | 0.726397  | 0.006886  |
| H                                    | -2.139066 | -1.584094 | 4.948015  | H                          | -9.433353  | 1.234910  | 1.105713  |
| H                                    | -1.922930 | -1.125475 | 6.702514  | H                          | -10.143358 | 2.405966  | -0.046684 |
| <b>1d(dcm), Me-side coordination</b> |           |           |           | C                          | -9.417237  | 1.069335  | -2.394113 |
| C                                    | -2.054461 | -0.145930 | 1.538802  | H                          | -8.696846  | 0.757685  | -3.177672 |
| C                                    | -2.996808 | 0.225734  | 2.520379  | H                          | -10.327686 | 0.442607  | -2.495965 |
| C                                    | -2.572010 | 0.477284  | 3.832318  | H                          | -9.707221  | 2.118551  | -2.602287 |
| C                                    | -1.214014 | 0.347596  | 4.148318  | C                          | -8.489583  | -0.582485 | -0.759650 |
| C                                    | -0.331477 | -0.034745 | 3.133713  | H                          | -9.419205  | -1.180327 | -0.849543 |
| C                                    | -2.576576 | -0.541806 | 0.135113  | H                          | -8.069422  | -0.771505 | 0.248966  |
| C                                    | -1.645728 | -0.358748 | -1.089070 | H                          | -7.771722  | -0.970962 | -1.510161 |
| N                                    | -0.752680 | -0.277189 | 1.867551  | Cl                         | 0.947526   | -3.202730 | 0.939881  |
| N                                    | -0.310423 | -0.520241 | -0.983969 | C                          | 2.778224   | -3.162262 | 1.209804  |
| C                                    | -2.236177 | -0.161590 | -2.354612 | Cl                         | 3.427103   | -4.775030 | 1.459833  |
| C                                    | -1.427986 | -0.113872 | -3.499015 | H                          | 2.910320   | -2.516972 | 2.097353  |
| C                                    | -0.043130 | -0.272332 | -3.365760 | H                          | 3.179287   | -2.687128 | 0.296047  |
| C                                    | 0.480040  | -0.475555 | -2.085281 | <b>1d(dcm)<sub>2</sub></b> |            |           |           |
| C                                    | -2.940187 | -2.043616 | 0.198712  | C                          | -0.063536  | 4.495694  | 2.664793  |
| O                                    | -3.811846 | 0.133099  | -0.111646 | C                          | 0.531816   | 5.258238  | 3.692071  |
| C                                    | 1.168180  | -0.214372 | 3.401909  | C                          | 0.470092   | 4.807394  | 5.017303  |
| C                                    | 1.983540  | -0.676713 | -1.857698 | C                          | -0.195091  | 3.608150  | 5.300992  |
| O                                    | 1.858670  | -0.520609 | 2.341917  | C                          | -0.762916  | 2.897800  | 4.239147  |
| O                                    | 1.587296  | -0.060118 | 4.547191  | C                          | -0.115044  | 5.109205  | 1.242977  |
| O                                    | 2.313857  | -0.797993 | -0.604639 | C                          | -0.211366  | 4.178045  | 0.007827  |





|    |           |           |          |   |           |           |           |
|----|-----------|-----------|----------|---|-----------|-----------|-----------|
| H  | 0.688196  | 7.580942  | 3.088436 | H | -3.383027 | 0.791673  | 4.441655  |
| C  | 5.829886  | 5.724090  | 2.829497 | H | -3.201484 | 0.188808  | -2.581933 |
| C  | 5.965949  | 4.254871  | 3.271828 | H | -1.731490 | 0.582908  | -4.591753 |
| H  | 5.373553  | 3.572239  | 2.629072 | N | 1.007133  | -2.460765 | 0.635256  |
| H  | 7.026125  | 3.937671  | 3.202081 | C | 0.918134  | -3.121132 | 1.809868  |
| H  | 5.645167  | 4.106192  | 4.323084 | C | 1.121191  | -4.502461 | 1.910541  |
| C  | 6.336660  | 5.839532  | 1.371921 | C | 1.434920  | -5.229022 | 0.752795  |
| H  | 5.721661  | 5.222096  | 0.685976 | C | 1.534464  | -4.539537 | -0.464367 |
| H  | 7.387867  | 5.490955  | 1.298195 | C | 1.316719  | -3.156839 | -0.479734 |
| H  | 6.304585  | 6.884224  | 1.003196 | H | 0.692310  | -2.512111 | 2.696918  |
| C  | 6.716836  | 6.591909  | 3.754273 | H | 1.606075  | -6.315236 | 0.799565  |
| H  | 7.771917  | 6.249741  | 3.712301 | H | 1.041224  | -4.992500 | 2.891660  |
| H  | 6.376585  | 6.526967  | 4.807842 | H | 1.406399  | -2.575299 | -1.408463 |
| H  | 6.700270  | 7.660628  | 3.461246 | H | 1.787669  | -5.059417 | -1.399635 |
| C  | 2.506241  | 9.544792  | 2.176670 | C | -5.211786 | 2.136642  | -0.563441 |
| C  | 3.343417  | 10.482671 | 3.079074 | H | -3.127939 | 2.062183  | -1.131714 |
| H  | 4.429616  | 10.280011 | 2.992183 | H | -3.407662 | 2.105887  | 0.626909  |
| H  | 3.176857  | 11.543092 | 2.796808 | C | -5.458100 | 3.520466  | -0.646522 |
| H  | 3.063300  | 10.364007 | 4.145566 | C | -6.756235 | 4.015375  | -0.866308 |
| C  | 2.926936  | 9.740334  | 0.700396 | C | -7.590177 | 1.683914  | -0.924193 |
| H  | 2.339352  | 9.082165  | 0.028360 | C | -7.800363 | 3.074351  | -0.999808 |
| H  | 2.758436  | 10.791111 | 0.384545 | H | -4.612326 | 4.215124  | -0.535688 |
| H  | 3.999583  | 9.510455  | 0.542834 | C | -6.273392 | 1.228484  | -0.702416 |
| C  | 1.024017  | 9.939886  | 2.314127 | H | -6.047603 | 0.157499  | -0.634626 |
| H  | 0.368025  | 9.322324  | 1.667784 | H | -8.822774 | 3.444693  | -1.171662 |
| H  | 0.665690  | 9.844800  | 3.359035 | C | -7.067100 | 5.523984  | -0.964127 |
| H  | 0.887953  | 10.997647 | 2.010246 | C | -5.804964 | 6.391767  | -0.801302 |
| Cl | -5.375379 | 3.188937  | 5.459796 | H | -5.053016 | 6.183291  | -1.589261 |
| C  | -6.173963 | 1.611856  | 5.898100 | H | -5.321325 | 6.241649  | 0.185332  |
| Cl | -7.906300 | 1.803159  | 6.208721 | H | -6.074748 | 7.464605  | -0.876864 |
| H  | -5.647986 | 1.251383  | 6.800070 | C | -7.689565 | 5.829759  | -2.347521 |
| H  | -5.996043 | 0.941302  | 5.038145 | H | -6.991202 | 5.562110  | -3.166435 |

**1d(py)(dcm), Me-side coordination of py**

|    |           |           |           |                                      |            |           |           |
|----|-----------|-----------|-----------|--------------------------------------|------------|-----------|-----------|
| C  | -2.006662 | 0.008225  | 1.396788  | H                                    | -7.923522  | 6.911123  | -2.436010 |
| C  | -2.993434 | 0.303863  | 2.360930  | H                                    | -8.631523  | 5.269094  | -2.512533 |
| C  | -2.616178 | 0.558998  | 3.686659  | C                                    | -8.068707  | 5.913220  | 0.149476  |
| C  | -1.259841 | 0.515930  | 4.029590  | H                                    | -9.020238  | 5.351168  | 0.066319  |
| C  | -0.332319 | 0.196879  | 3.032124  | H                                    | -7.644830  | 5.711490  | 1.154284  |
| C  | -2.470459 | -0.361627 | -0.035341 | H                                    | -8.311995  | 6.994646  | 0.091066  |
| C  | -1.527296 | -0.051421 | -1.225088 | C                                    | -8.783621  | 0.717721  | -1.086039 |
| N  | -0.708374 | -0.062790 | 1.755242  | C                                    | -9.825880  | 0.999775  | 0.022615  |
| N  | -0.186482 | -0.112878 | -1.094899 | H                                    | -10.697565 | 0.320522  | -0.082320 |
| C  | -2.106968 | 0.183565  | -2.489610 | H                                    | -9.388151  | 0.842935  | 1.029544  |
| C  | -1.283155 | 0.396946  | -3.603490 | H                                    | -10.205058 | 2.040295  | -0.020503 |
| C  | 0.106580  | 0.374695  | -3.437529 | C                                    | -9.435103  | 0.935788  | -2.472585 |
| C  | 0.619159  | 0.109132  | -2.163182 | H                                    | -8.712458  | 0.731300  | -3.288703 |
| C  | -2.741275 | -1.882754 | -0.048757 | H                                    | -10.302854 | 0.256170  | -2.604101 |
| O  | -3.743458 | 0.244522  | -0.282050 | H                                    | -9.800596  | 1.974238  | -2.599731 |
| C  | 1.170553  | 0.127858  | 3.339769  | C                                    | -8.355807  | -0.758148 | -0.982057 |
| C  | 2.132627  | 0.061789  | -1.908336 | H                                    | -9.239812  | -1.415601 | -1.109251 |
| O  | 1.903893  | -0.220220 | 2.326050  | H                                    | -7.907106  | -0.991663 | 0.004680  |
| O  | 1.547711  | 0.396510  | 4.481424  | H                                    | -7.622062  | -1.032377 | -1.766848 |
| O  | 2.456771  | -0.273694 | -0.697711 | Cl                                   | 1.354448   | 2.495880  | 0.600550  |
| O  | 2.892333  | 0.337766  | -2.839080 | C                                    | 3.129117   | 2.247790  | 0.908355  |
| H  | 0.826828  | 0.550248  | -4.249582 | Cl                                   | 3.966109   | 3.773809  | 1.246945  |
| H  | -3.476330 | -2.139022 | 0.738804  | H                                    | 3.194009   | 1.565533  | 1.775648  |
| H  | -1.801008 | -2.434332 | 0.139248  | H                                    | 3.540397   | 1.776808  | -0.001100 |
| Ni | 0.920835  | -0.421849 | 0.586957  |                                      |            |           |           |
| C  | -3.791498 | 1.669951  | -0.325413 | <b>1d<sub>z</sub>, S = 1 + S = 0</b> |            |           |           |
| H  | -3.147523 | -2.182923 | -1.034225 | Ni                                   | -0.839567  | 8.439657  | 10.772921 |
| H  | -0.872423 | 0.715359  | 5.039090  | N                                    | -0.352422  | 10.211245 | 10.535788 |
| H  | -4.048990 | 0.321098  | 2.057853  | N                                    | 0.769955   | 7.859672  | 11.524893 |
|    |           |           |           | O                                    | -2.521902  | 8.916674  | 10.150870 |
|    |           |           |           | O                                    | -1.470381  | 6.691807  | 11.087616 |

|    |           |           |           |   |           |           |           |
|----|-----------|-----------|-----------|---|-----------|-----------|-----------|
| C  | -1.410365 | 10.980836 | 10.148684 | C | -6.138023 | -1.430380 | 5.319358  |
| C  | 0.863346  | 10.771312 | 10.726720 | C | -6.494498 | -0.731259 | 6.488881  |
| C  | 1.918169  | 8.553474  | 11.666840 | C | -5.515203 | 0.086516  | 7.090473  |
| C  | 0.715966  | 6.552227  | 11.918439 | C | -4.542614 | -2.143281 | 3.453639  |
| C  | -2.683392 | 10.195452 | 9.906808  | C | -3.093963 | -1.934855 | 2.973862  |
| C  | -0.575730 | 5.888805  | 11.543301 | H | -2.354362 | -2.265910 | 3.730933  |
| C  | -1.303451 | 12.357052 | 9.968501  | H | -2.886376 | -0.873311 | 2.729244  |
| C  | 1.029447  | 12.160135 | 10.552608 | H | -2.913615 | -2.527409 | 2.054060  |
| C  | 2.112947  | 9.907556  | 10.962707 | C | -4.750224 | -3.652602 | 3.724731  |
| C  | 3.029176  | 7.956882  | 12.297143 | H | -4.543110 | -4.243361 | 2.808086  |
| C  | 1.786265  | 5.900873  | 12.527007 | H | -5.788345 | -3.878016 | 4.040524  |
| O  | -3.712158 | 10.734414 | 9.517677  | H | -4.070254 | -4.010916 | 4.524329  |
| O  | -0.720241 | 4.638713  | 11.617484 | C | -5.497013 | -1.686805 | 2.324098  |
| C  | -0.057365 | 12.962927 | 10.184689 | H | -5.295691 | -2.255329 | 1.392131  |
| C  | 2.700332  | 9.580633  | 9.568032  | H | -5.364748 | -0.608041 | 2.103349  |
| O  | 3.103042  | 10.673540 | 11.647039 | H | -6.560634 | -1.847155 | 2.591031  |
| C  | 2.961521  | 6.632646  | 12.744427 | C | -7.918285 | -0.878093 | 7.066925  |
| Ni | 0.240649  | 3.866174  | 9.930189  | C | -8.950549 | -0.413713 | 6.011744  |
| C  | 2.794121  | 11.073008 | 12.980278 | H | -8.792941 | 0.650624  | 5.742757  |
| N  | -1.249357 | 4.372345  | 8.662706  | H | -9.982812 | -0.518490 | 6.406300  |
| N  | -0.401118 | 1.975483  | 10.076675 | H | -8.886313 | -1.009263 | 5.079199  |
| O  | 1.016792  | 5.619493  | 9.285767  | C | -8.176326 | -2.362380 | 7.421067  |
| O  | 1.863678  | 3.170352  | 10.818248 | H | -8.086900 | -3.021241 | 6.534236  |
| C  | -1.052698 | 5.598297  | 8.117160  | H | -9.198932 | -2.491121 | 7.833413  |
| C  | -2.373148 | 3.676767  | 8.400962  | H | -7.452490 | -2.721602 | 8.180767  |
| C  | -1.575462 | 1.459484  | 9.664445  | C | -8.118305 | -0.035951 | 8.341068  |
| C  | 0.547330  | 1.192775  | 10.645406 | H | -7.971748 | 1.046283  | 8.149849  |
| C  | 0.220733  | 6.321739  | 8.551750  | H | -7.424231 | -0.338338 | 9.151074  |
| C  | 1.834708  | 1.900508  | 11.094818 | H | -9.151371 | -0.169252 | 8.721548  |
| C  | -1.981596 | 6.186059  | 7.254252  | H | -6.891670 | -2.072856 | 4.838156  |
| C  | -3.348043 | 4.212281  | 7.532541  | H | -2.892079 | -0.423371 | 4.953312  |
| C  | -2.719721 | 2.379052  | 9.173876  | H | -5.732623 | 0.653462  | 8.003613  |
| C  | -1.832682 | 0.082024  | 9.827940  | C | 4.005071  | 11.702683 | 13.635181 |
| C  | 0.356871  | -0.180472 | 10.825705 | H | 2.456879  | 10.195145 | 13.581640 |
| O  | 0.373017  | 7.510976  | 8.219260  | H | 1.943502  | 11.796143 | 12.986938 |
| O  | 2.704948  | 1.237003  | 11.659142 | C | 5.236532  | 11.798877 | 12.968003 |
| C  | -3.146022 | 5.470195  | 6.950196  | C | 6.357047  | 12.379293 | 13.599044 |
| O  | -3.641540 | 1.602619  | 8.403358  | C | 6.196524  | 12.854611 | 14.914989 |
| C  | -3.496840 | 2.824645  | 10.435132 | C | 4.972400  | 12.776354 | 15.614178 |
| C  | -0.856216 | -0.741639 | 10.406032 | C | 3.878928  | 12.193205 | 14.948919 |
| H  | 2.033870  | 12.582167 | 10.695447 | H | 2.904483  | 12.110341 | 15.452915 |
| H  | 0.075301  | 14.047567 | 10.054441 | H | 7.062711  | 13.306517 | 15.422574 |
| H  | -3.909231 | 5.896076  | 6.281149  | H | 5.301031  | 11.412317 | 11.943792 |
| H  | -1.770245 | 7.194008  | 6.871582  | C | 7.728667  | 12.498479 | 12.900646 |
| H  | -2.805488 | -0.321140 | 9.515496  | C | 7.697908  | 11.951232 | 11.461459 |
| H  | -1.052980 | -1.817355 | 10.534451 | H | 6.973236  | 12.498903 | 10.825542 |
| H  | 1.167799  | -0.752636 | 11.298862 | H | 7.434936  | 10.874513 | 11.432384 |
| H  | -2.206661 | 12.901382 | 9.655461  | H | 8.698301  | 12.060650 | 10.995696 |
| H  | 3.951333  | 8.546332  | 12.395043 | C | 8.149531  | 13.986696 | 12.844324 |
| H  | 1.694007  | 4.830659  | 12.758282 | H | 7.414533  | 14.586986 | 12.270321 |
| H  | 2.001321  | 8.926811  | 9.003828  | H | 9.138131  | 14.091588 | 12.350615 |
| H  | 3.662260  | 9.047844  | 9.698397  | H | 8.231922  | 14.433006 | 13.855475 |
| H  | 2.878688  | 10.519911 | 9.009065  | C | 8.780778  | 11.696228 | 13.703609 |
| H  | 3.833865  | 6.162076  | 13.221335 | H | 8.508360  | 10.622374 | 13.754953 |
| H  | -4.269883 | 3.643446  | 7.350622  | H | 8.879398  | 12.068026 | 14.743132 |
| C  | -3.171766 | 1.080627  | 7.163679  | H | 9.778250  | 11.774180 | 13.222825 |
| H  | -4.387289 | 3.409878  | 10.133755 | C | 4.880026  | 13.314949 | 17.057430 |
| H  | -2.845245 | 3.457100  | 11.069432 | C | 3.465266  | 13.165655 | 17.647713 |
| H  | -3.823702 | 1.933846  | 11.006266 | H | 2.709216  | 13.724996 | 17.059980 |
| C  | -4.228711 | 0.195001  | 6.538304  | H | 3.445237  | 13.567382 | 18.680921 |
| H  | -2.231772 | 0.497365  | 7.308751  | H | 3.146573  | 12.104715 | 17.700235 |
| H  | -2.913918 | 1.909859  | 6.461877  | C | 5.865618  | 12.530872 | 17.956905 |
| C  | -3.906298 | -0.519699 | 5.368780  | H | 6.912533  | 12.629073 | 17.606877 |
| C  | -4.854737 | -1.344401 | 4.736756  | H | 5.616529  | 11.450304 | 17.972616 |

|   |          |           |           |   |           |          |           |
|---|----------|-----------|-----------|---|-----------|----------|-----------|
| H | 5.823091 | 12.908150 | 18.999981 | H | 4.592614  | 5.600506 | 13.705478 |
| C | 5.253629 | 14.816686 | 17.070720 | H | -3.901891 | 3.935896 | 7.831346  |
| H | 4.557172 | 15.406056 | 16.440085 | C | -3.003100 | 1.345895 | 7.328779  |
| H | 6.280523 | 14.992627 | 16.692596 | H | -3.750179 | 3.485948 | 10.591948 |
| H | 5.204871 | 15.218964 | 18.104025 | H | -2.117872 | 3.352462 | 11.350788 |

**1d<sub>2</sub>, 2 · S = 1**

|    |           |           |           |   |           |           |           |
|----|-----------|-----------|-----------|---|-----------|-----------|-----------|
| Ni | 0.227083  | 8.214980  | 10.742631 | H | -2.795124 | 2.221233  | 6.666898  |
| N  | 0.968168  | 10.069566 | 10.709095 | C | -3.956668 | -0.144860 | 5.544203  |
| N  | 1.793784  | 7.498997  | 11.795003 | C | -4.995666 | -0.888420 | 4.955392  |
| O  | -1.454717 | 9.080988  | 10.231845 | C | -6.235944 | -0.924455 | 5.628793  |
| O  | -0.593272 | 6.413318  | 11.320384 | C | -6.464109 | -0.255403 | 6.847249  |
| C  | 0.013926  | 10.953382 | 10.330878 | C | -5.397164 | 0.480918  | 7.403213  |
| C  | 2.213152  | 10.475588 | 11.021433 | C | -4.823625 | -1.656325 | 3.627689  |
| C  | 2.975121  | 8.109138  | 12.007649 | C | -3.408437 | -1.497915 | 3.040498  |
| C  | 1.598190  | 6.219863  | 12.207227 | H | -2.628947 | -1.887969 | 3.726102  |
| C  | -1.372406 | 10.363453 | 10.030817 | H | -3.169244 | -0.439380 | 2.812161  |
| C  | 0.280477  | 5.610529  | 11.769091 | H | -3.329550 | -2.067096 | 2.092219  |
| C  | 0.279201  | 12.322190 | 10.232444 | C | -5.080380 | -3.162944 | 3.870505  |
| C  | 2.546210  | 11.843831 | 10.936301 | H | -4.969974 | -3.731998 | 2.923874  |
| C  | 3.331696  | 9.448096  | 11.313442 | H | -6.101439 | -3.352415 | 4.257733  |
| C  | 3.998015  | 7.439107  | 12.714033 | H | -4.359773 | -3.576704 | 4.605068  |
| C  | 2.575336  | 5.493673  | 12.892830 | C | -5.840898 | -1.120958 | 2.591662  |
| O  | -2.267263 | 11.119965 | 9.655118  | H | -5.734768 | -1.662928 | 1.628809  |
| O  | 0.169235  | 4.341625  | 11.798500 | H | -5.679962 | -0.040995 | 2.397532  |
| C  | 1.570813  | 12.770113 | 10.540479 | H | -6.887232 | -1.248696 | 2.934188  |
| C  | 3.939374  | 9.061035  | 9.944203  | C | -7.847570 | -0.345845 | 7.525907  |
| O  | 4.376906  | 10.095982 | 12.042260 | C | -8.926889 | 0.210553  | 6.566725  |
| C  | 3.791625  | 6.131499  | 13.169417 | H | -8.728446 | 1.272764  | 6.317125  |
| Ni | 0.833023  | 3.666283  | 9.948507  | H | -9.931136 | 0.150324  | 7.035776  |
| C  | 4.063533  | 10.535098 | 13.362160 | H | -8.967627 | -0.356527 | 5.615341  |
| N  | -0.733687 | 4.382143  | 8.896048  | C | -8.161853 | -1.825711 | 7.851650  |
| N  | 0.092062  | 1.811650  | 9.982051  | H | -8.181175 | -2.455602 | 6.939759  |
| O  | 1.653282  | 5.467969  | 9.370726  | H | -9.154519 | -1.912687 | 8.340865  |
| O  | 2.514839  | 2.800414  | 10.459504 | H | -7.402762 | -2.251745 | 8.538922  |
| C  | -0.538164 | 5.661286  | 8.483820  | C | -7.906019 | 0.459957  | 8.837222  |
| C  | -1.914976 | 3.771921  | 8.683366  | H | -7.709971 | 1.538399  | 8.670096  |
| C  | -1.152869 | 1.405530  | 9.669625  | H | -7.175370 | 0.090277  | 9.584824  |
| C  | 1.046344  | 0.927909  | 10.360343 | H | -8.915363 | 0.371795  | 9.288039  |
| C  | 0.779497  | 6.270704  | 8.921991  | H | -7.059010 | -1.504484 | 5.183078  |
| C  | 2.432603  | 1.517945  | 10.660535 | H | -2.970691 | -0.090302 | 5.059304  |
| C  | -1.515337 | 6.387410  | 7.798185  | H | -5.514016 | 1.019929  | 8.351124  |
| C  | -2.937892 | 4.441882  | 7.976946  | C | 5.211161  | 11.341574 | 13.931497 |
| C  | -2.271478 | 2.432934  | 9.377553  | H | 3.855407  | 9.659798  | 14.024042 |
| C  | -1.485823 | 0.037260  | 9.754727  | H | 3.133666  | 11.150771 | 13.366100 |
| C  | 0.781171  | -0.440920 | 10.458755 | C | 6.457724  | 11.399719 | 13.287610 |
| O  | 0.890660  | 7.539614  | 8.892579  | C | 7.524818  | 12.135846 | 13.843545 |
| O  | 3.327487  | 0.761496  | 11.036296 | C | 7.296841  | 12.804849 | 15.062064 |
| C  | -2.731576 | 5.749503  | 7.521564  | C | 6.056608  | 12.768950 | 15.735554 |
| O  | -3.316589 | 1.784962  | 8.648669  | C | 5.017460  | 12.025575 | 15.146774 |
| C  | -2.879270 | 2.819941  | 10.746757 | H | 4.031513  | 11.971124 | 15.631743 |
| C  | -0.510380 | -0.888946 | 10.150616 | H | 8.120026  | 13.384729 | 15.507756 |
| H  | 3.572278  | 12.160517 | 11.167444 | H | 6.574426  | 10.860754 | 12.339654 |
| H  | -3.532584 | 6.280439  | 6.985476  | C | 8.908240  | 12.226134 | 13.164787 |
| H  | -1.315215 | 7.435146  | 7.536733  | C | 8.966451  | 11.420460 | 11.853383 |
| H  | -2.511849 | -0.279508 | 9.523511  | H | 8.235837  | 11.790371 | 11.105861 |
| H  | -0.766482 | -1.957524 | 10.220341 | H | 8.770191  | 10.342041 | 12.020406 |
| H  | 1.600441  | -1.101074 | 10.777932 | H | 9.975789  | 11.508465 | 11.402520 |
| H  | 4.962052  | 7.945028  | 12.859605 | C | 9.222735  | 13.705984 | 12.839173 |
| H  | 2.375156  | 4.445948  | 13.154282 | H | 8.463663  | 14.132207 | 12.151997 |
| H  | 3.177896  | 8.528579  | 9.340218  | H | 10.215380 | 13.792852 | 12.349896 |
| H  | 4.810235  | 8.394953  | 10.098960 | H | 9.242221  | 14.335779 | 13.751126 |
| H  | 4.269244  | 9.973924  | 9.411158  | C | 9.987546  | 11.669460 | 14.123822 |

|   |           |           |           |   |           |           |           |
|---|-----------|-----------|-----------|---|-----------|-----------|-----------|
| H | 9.788951  | 10.607254 | 14.373326 | C | -3.330302 | 2.627492  | 10.504385 |
| H | 10.028454 | 12.236432 | 15.075263 | C | -0.742846 | -0.936740 | 10.343866 |
| H | 10.991765 | 11.729574 | 13.654696 | H | 1.893671  | 12.426923 | 10.905813 |
| C | 5.884771  | 13.536803 | 17.063314 | H | -0.162566 | 13.818045 | 10.428492 |
| C | 4.469644  | 13.378450 | 17.650669 | H | -3.972738 | 5.802855  | 6.487947  |
| H | 3.690091  | 13.768549 | 16.965161 | H | -1.820336 | 7.104911  | 7.018204  |
| H | 4.390895  | 13.947621 | 18.598965 | H | -2.723757 | -0.479003 | 9.545502  |
| H | 4.230430  | 12.319922 | 17.879020 | H | -0.953505 | -2.008016 | 10.486301 |
| C | 6.902137  | 13.001332 | 18.099195 | H | 1.318263  | -0.982179 | 11.144783 |
| H | 7.948438  | 13.129012 | 17.756543 | H | -2.409730 | 12.578856 | 10.116710 |
| H | 6.741153  | 11.921373 | 18.293308 | H | 4.085634  | 8.425110  | 12.341453 |
| H | 6.796165  | 13.543276 | 19.062079 | H | 2.044903  | 4.575170  | 12.597366 |
| C | 6.141584  | 15.043417 | 16.820530 | H | 1.947584  | 8.858092  | 9.066357  |
| H | 5.420923  | 15.457244 | 16.086056 | H | 3.634646  | 9.033553  | 9.684707  |
| H | 7.162614  | 15.232845 | 16.433201 | H | 2.744183  | 10.491574 | 9.107725  |
| H | 6.031309  | 15.612441 | 17.767193 | H | 4.132502  | 5.998941  | 13.042125 |
| H | -0.540042 | 12.982410 | 9.913333  | H | -4.253706 | 3.508868  | 7.490678  |
| H | 1.826996  | 13.838670 | 10.470729 | C | -3.135834 | 0.955816  | 7.185512  |

**1d<sub>2</sub>(dcm), S = 1 + S = 0**

|    |           |           |           |   |            |           |           |
|----|-----------|-----------|-----------|---|------------|-----------|-----------|
| Ni | -0.775976 | 8.148631  | 10.971422 | H | -2.644737  | 3.241103  | 11.121245 |
| N  | -0.386358 | 9.950663  | 10.787487 | H | -3.635085  | 1.725212  | 11.069546 |
| N  | 0.903782  | 7.612295  | 11.587652 | C | -4.255626  | 0.186941  | 6.517333  |
| O  | -2.513635 | 8.568913  | 10.473950 | H | -2.243414  | 0.295855  | 7.300762  |
| O  | -1.297087 | 6.356618  | 11.208111 | H | -2.812486  | 1.797189  | 6.526154  |
| C  | -1.499108 | 10.682648 | 10.490981 | C | -3.982398  | -0.496032 | 5.316644  |
| C  | 0.811363  | 10.561594 | 10.930657 | C | -4.988718  | -1.211681 | 4.642957  |
| C  | 2.020934  | 8.359666  | 11.710953 | C | -6.279214  | -1.221045 | 5.215729  |
| C  | 0.937753  | 6.284404  | 11.907490 | C | -6.587440  | -0.551799 | 6.416019  |
| C  | -2.747383 | 9.847046  | 10.292464 | C | -5.550355  | 0.155043  | 7.059905  |
| C  | -0.338408 | 5.573242  | 11.564790 | C | -4.731420  | -1.974574 | 3.326282  |
| C  | -1.465729 | 12.067851 | 10.357032 | C | -3.267615  | -1.859571 | 2.860925  |
| C  | 0.903560  | 11.962022 | 10.800945 | H | -2.561333  | -2.280345 | 3.605159  |
| C  | 2.111627  | 9.752399  | 11.065114 | H | -2.975555  | -0.808068 | 2.663926  |
| C  | 3.191153  | 7.792761  | 12.255114 | H | -3.128007  | -2.423929 | 1.916670  |
| C  | 2.070965  | 5.660568  | 12.424511 | C | -5.057303  | -3.473549 | 3.530105  |
| O  | -3.821077 | 10.351005 | 9.986901  | H | -4.887868  | -4.038335 | 2.589659  |
| O  | -0.416648 | 4.319716  | 11.574604 | H | -6.112666  | -3.631636 | 3.829494  |
| C  | -0.238044 | 12.724423 | 10.524859 | H | -4.414334  | -3.917517 | 4.317220  |
| C  | 2.641127  | 9.519614  | 9.628418  | C | -5.639648  | -1.396479 | 2.214628  |
| O  | 3.096790  | 10.539842 | 11.731536 | H | -5.475352  | -1.937170 | 1.259170  |
| C  | 3.214871  | 6.444218  | 12.629900 | H | -5.423317  | -0.322456 | 2.042510  |
| Ni | 0.430452  | 3.635901  | 9.740152  | H | -6.714367  | -1.486274 | 2.469893  |
| C  | 2.837107  | 10.871720 | 13.094684 | C | -8.022735  | -0.610519 | 6.981233  |
| N  | -1.174745 | 4.223884  | 8.667248  | C | -9.006667  | -0.016794 | 5.944873  |
| N  | -0.247951 | 1.768624  | 9.972341  | H | -8.759534  | 1.041073  | 5.721698  |
| O  | 1.114709  | 5.487254  | 9.209894  | H | -10.046250 | -0.051863 | 6.332591  |
| O  | 2.072350  | 2.922423  | 10.646178 | H | -8.987587  | -0.575730 | 4.987956  |
| C  | -1.020139 | 5.471093  | 8.158890  | C | -8.402382  | -2.083540 | 7.265505  |
| C  | -2.306167 | 3.528380  | 8.445055  | H | -8.362501  | -2.705208 | 6.348788  |
| C  | -1.451901 | 1.275839  | 9.626308  | H | -9.434176  | -2.146987 | 7.670057  |
| C  | 0.708176  | 0.971194  | 10.505297 | H | -7.714446  | -2.535736 | 8.008663  |
| C  | 0.267228  | 6.198181  | 8.538930  | C | -8.164083  | 0.186090  | 8.291995  |
| C  | 2.029660  | 1.645494  | 10.896581 | H | -7.928747  | 1.260454  | 8.151506  |
| C  | -2.001374 | 6.081051  | 7.372958  | H | -7.503074  | -0.208123 | 9.090127  |
| C  | -3.330552 | 4.082989  | 7.647487  | H | -9.207545  | 0.119798  | 8.661693  |
| C  | -2.611059 | 2.209410  | 9.199978  | H | -7.077603  | -1.778039 | 4.701238  |
| C  | -1.728538 | -0.095997 | 9.809201  | H | -2.960396  | -0.462163 | 4.910598  |
| C  | 0.498177  | -0.396629 | 10.705235 | H | -5.728706  | 0.691793  | 7.999412  |
| O  | 0.393160  | 7.393760  | 8.224987  | C | 4.000781   | 11.647958 | 13.672333 |
| O  | 2.920058  | 0.956641  | 11.395679 | H | 2.668120   | 9.943318  | 13.692763 |
| C  | -3.172189 | 5.362740  | 7.101779  | H | 1.901133   | 11.472163 | 13.185100 |
| O  | -3.564771 | 1.450359  | 8.450776  | C | 5.241649   | 11.702493 | 13.016880 |
|    |           |           |           | C | 6.327622   | 12.402681 | 13.581904 |
|    |           |           |           | C | 6.124250   | 13.040083 | 14.821795 |

|                                     |           |           |           |   |            |           |           |
|-------------------------------------|-----------|-----------|-----------|---|------------|-----------|-----------|
| C                                   | 4.890216  | 13.008528 | 15.506442 | N | -0.201936  | 1.523866  | 9.855404  |
| C                                   | 3.831197  | 12.301930 | 14.907275 | O | 1.299853   | 5.219123  | 9.098026  |
| H                                   | 2.848803  | 12.253631 | 15.399919 | O | 2.195350   | 2.562847  | 10.429531 |
| H                                   | 6.962303  | 13.592464 | 15.274604 | C | -0.897952  | 5.325838  | 8.203208  |
| H                                   | 5.337320  | 11.195200 | 12.049119 | C | -2.222146  | 3.403407  | 8.424881  |
| C                                   | 7.704554  | 12.489820 | 12.889697 | C | -1.435293  | 1.090050  | 9.536788  |
| C                                   | 7.735745  | 11.717070 | 11.557677 | C | 0.737285   | 0.678229  | 10.341079 |
| H                                   | 7.003775  | 12.117846 | 10.827632 | C | 0.393796   | 5.986530  | 8.644398  |
| H                                   | 7.524050  | 10.637948 | 11.699747 | C | 2.104864   | 1.287955  | 10.677786 |
| H                                   | 8.741687  | 11.800189 | 11.098471 | C | -1.885030  | 6.009528  | 7.489219  |
| C                                   | 8.036988  | 13.972689 | 12.597539 | C | -3.250822  | 4.025354  | 7.682198  |
| H                                   | 7.276944  | 14.426503 | 11.929369 | C | -2.561065  | 2.083368  | 9.163835  |
| H                                   | 9.025510  | 14.057455 | 12.099712 | C | -1.765471  | -0.271284 | 9.706317  |
| H                                   | 8.074982  | 14.579138 | 13.524539 | C | 0.473549   | -0.682150 | 10.527330 |
| C                                   | 8.786263  | 11.892847 | 13.821375 | O | 0.462124   | 7.257022  | 8.610788  |
| H                                   | 8.575957  | 10.826989 | 14.044452 | O | 2.985386   | 0.553657  | 11.125617 |
| H                                   | 8.845676  | 12.432830 | 14.787416 | C | -3.074567  | 5.327447  | 7.200941  |
| H                                   | 9.785940  | 11.952080 | 13.342673 | O | -3.576337  | 1.385883  | 8.439002  |
| C                                   | 4.744037  | 13.745154 | 16.854792 | C | -3.207157  | 2.517358  | 10.501789 |
| C                                   | 3.333702  | 13.591051 | 17.454696 | C | -0.801067  | -1.161525 | 10.198415 |
| H                                   | 2.551647  | 14.010004 | 16.789326 | H | 2.541381   | 12.160738 | 11.072422 |
| H                                   | 3.274356  | 14.136172 | 18.418357 | H | 0.667435   | 13.667973 | 10.330239 |
| H                                   | 3.082323  | 12.530304 | 17.658400 | H | -3.879799  | 5.821733  | 6.636979  |
| C                                   | 5.765622  | 13.171149 | 17.865519 | H | -1.715305  | 7.058591  | 7.213044  |
| H                                   | 6.809803  | 13.294004 | 17.514797 | H | -2.783448  | -0.607640 | 9.467044  |
| H                                   | 5.592633  | 12.088896 | 18.034929 | H | -1.053784  | -2.224832 | 10.331769 |
| H                                   | 5.677351  | 13.690231 | 18.842639 | H | 1.281520   | -1.310525 | 10.928559 |
| C                                   | 5.018278  | 15.253566 | 16.644412 | H | -1.556314  | 12.588012 | 9.597924  |
| H                                   | 4.296433  | 15.693151 | 15.926249 | H | 4.321732   | 8.049870  | 12.652739 |
| H                                   | 6.038061  | 15.438716 | 16.251734 | H | 2.040622   | 4.335274  | 12.872853 |
| H                                   | 4.924081  | 15.802205 | 17.604731 | H | 2.590228   | 8.542217  | 9.109802  |
| Cl                                  | 1.756268  | 2.874358  | 7.447652  | H | 4.204026   | 8.557668  | 9.920468  |
| C                                   | 3.280576  | 3.711304  | 7.984153  | H | 3.526516   | 10.088023 | 9.244714  |
| Cl                                  | 4.601900  | 3.504726  | 6.824066  | H | 4.144187   | 5.670805  | 13.469408 |
| H                                   | 3.014593  | 4.777658  | 8.090363  | H | -4.195856  | 3.487116  | 7.528101  |
| H                                   | 3.536414  | 3.267838  | 8.963556  | C | -3.217047  | 0.894808  | 7.150573  |
| <b>1d<sub>2</sub>(dcm), 2 · S=1</b> |           |           |           | H | -4.080980  | 3.167319  | 10.301833 |
| Ni                                  | -0.363912 | 7.906482  | 10.411381 | H | -2.463814  | 3.081032  | 11.099844 |
| N                                   | 0.206009  | 9.822582  | 10.399630 | H | -3.539040  | 1.622622  | 11.063540 |
| N                                   | 1.225439  | 7.338273  | 11.524165 | C | -4.395178  | 0.191211  | 6.511365  |
| O                                   | -2.079739 | 8.609563  | 9.769353  | H | -2.353478  | 0.191764  | 7.221725  |
| O                                   | -1.054156 | 6.064765  | 11.004136 | H | -2.877661  | 1.732618  | 6.494512  |
| C                                   | -0.813986 | 10.614929 | 9.990612  | C | -4.196076  | -0.484976 | 5.292561  |
| C                                   | 1.382978  | 10.345962 | 10.793858 | C | -5.257734  | -1.142514 | 4.645004  |
| C                                   | 2.344008  | 8.047236  | 11.765336 | C | -6.526909  | -1.098867 | 5.261992  |
| C                                   | 1.131405  | 6.044974  | 11.926600 | C | -6.761341  | -0.434782 | 6.481826  |
| C                                   | -2.111008 | 9.896677  | 9.587550  | C | -5.670270  | 0.212022  | 7.099074  |
| C                                   | -0.129340 | 5.329401  | 11.475387 | C | -5.079809  | -1.902235 | 3.313332  |
| C                                   | -0.691146 | 12.006765 | 9.948050  | C | -3.632769  | -1.831819 | 2.790216  |
| C                                   | 1.570688  | 11.743899 | 10.771764 | H | -2.912104  | -2.284828 | 3.501014  |
| C                                   | 2.589481  | 9.427752  | 11.104306 | H | -3.313030  | -0.788505 | 2.592685  |
| C                                   | 3.409358  | 7.461665  | 12.484079 | H | -3.550743  | -2.389915 | 1.835604  |
| C                                   | 2.155994  | 5.398907  | 12.623775 | C | -5.446604  | -3.391089 | 3.522141  |
| O                                   | -3.047553 | 10.568575 | 9.156360  | H | -5.329181  | -3.955554 | 2.573598  |
| O                                   | -0.149087 | 4.061866  | 11.520824 | H | -6.494999  | -3.516516 | 3.859064  |
| C                                   | 0.524377  | 12.576437 | 10.349208 | H | -4.790257  | -3.859689 | 4.283486  |
| C                                   | 3.274671  | 9.134712  | 9.748831  | C | -6.012290  | -1.286769 | 2.242794  |
| O                                   | 3.543000  | 10.157743 | 11.879422 | H | -5.903086  | -1.824937 | 1.278159  |
| C                                   | 3.309292  | 6.135851  | 12.923641 | H | -5.768906  | -0.218798 | 2.069216  |
| Ni                                  | 0.544445  | 3.361036  | 9.642795  | H | -7.078576  | -1.344671 | 2.539448  |
| C                                   | 3.147117  | 10.530417 | 13.197535 | C | -8.177517  | -0.435012 | 7.096013  |
| N                                   | -1.062057 | 4.050387  | 8.636772  | C | -9.166961  | 0.218699  | 6.102016  |
|                                     |           |           |           | H | -8.877654  | 1.266826  | 5.883474  |
|                                     |           |           |           | H | -10.193195 | 0.227081  | 6.525053  |







|   |           |           |           |                                          |           |           |           |
|---|-----------|-----------|-----------|------------------------------------------|-----------|-----------|-----------|
| H | -2.432843 | -0.262473 | 9.712977  | H                                        | 8.212380  | 11.901040 | 11.153197 |
| H | -0.736580 | -1.909945 | 10.583427 | H                                        | 8.766878  | 10.446432 | 12.045155 |
| H | 1.603198  | -1.030197 | 11.220075 | H                                        | 9.956253  | 11.640537 | 11.447773 |
| H | 5.008582  | 7.967547  | 12.844532 | C                                        | 9.164831  | 13.803394 | 12.918576 |
| H | 2.482189  | 4.416615  | 13.045910 | H                                        | 8.398686  | 14.227443 | 12.237939 |
| H | 3.225268  | 8.556861  | 9.340043  | H                                        | 10.156286 | 13.915800 | 12.431933 |
| H | 4.857136  | 8.438820  | 10.106356 | H                                        | 9.171933  | 14.418006 | 13.840917 |
| H | 4.301166  | 10.014120 | 9.420626  | C                                        | 9.964198  | 11.759327 | 14.169802 |
| H | 4.677421  | 5.596594  | 13.633058 | H                                        | 9.784519  | 10.689460 | 14.400220 |
| H | -3.837844 | 3.910578  | 7.915595  | H                                        | 9.994285  | 12.309629 | 15.131369 |
| C | -2.891134 | 1.291871  | 7.423478  | H                                        | 10.967570 | 11.845908 | 13.702841 |
| H | -3.643312 | 3.509962  | 10.632793 | C                                        | 5.830840  | 13.499860 | 17.141106 |
| H | -2.001464 | 3.396488  | 11.382793 | C                                        | 4.417676  | 13.309979 | 17.723834 |
| H | -3.095412 | 1.950018  | 11.358473 | H                                        | 3.633239  | 13.702876 | 17.045573 |
| C | -4.063069 | 0.535339  | 6.834231  | H                                        | 4.330264  | 13.858549 | 18.683484 |
| H | -1.993884 | 0.627904  | 7.450490  | H                                        | 4.193042  | 12.243821 | 17.930323 |
| H | -2.626655 | 2.148040  | 6.754880  | C                                        | 6.854869  | 12.958265 | 18.167179 |
| C | -3.892969 | -0.119266 | 5.599487  | H                                        | 7.899480  | 13.105714 | 17.827291 |
| C | -4.952013 | -0.823447 | 4.998319  | H                                        | 6.707745  | 11.872837 | 18.340771 |
| C | -6.188501 | -0.849870 | 5.679280  | H                                        | 6.741826  | 13.480405 | 19.140193 |
| C | -6.393429 | -0.208500 | 6.916566  | C                                        | 6.066609  | 15.014401 | 16.928086 |
| C | -5.306336 | 0.488151  | 7.484655  | H                                        | 5.340291  | 15.431905 | 16.201312 |
| C | -4.805225 | -1.561388 | 3.650671  | H                                        | 7.084886  | 15.225484 | 16.544635 |
| C | -3.394253 | -1.408884 | 3.051776  | H                                        | 5.948426  | 15.563704 | 17.885421 |
| H | -2.613322 | -1.827872 | 3.718499  | N                                        | 1.916801  | 3.012186  | 7.933780  |
| H | -3.142655 | -0.348138 | 2.847719  | C                                        | 3.258905  | 3.139782  | 7.861702  |
| H | -3.334429 | -1.954751 | 2.088494  | C                                        | 1.239838  | 2.600042  | 6.845257  |
| C | -5.080305 | -3.069460 | 3.862169  | C                                        | 3.969049  | 2.860150  | 6.686790  |
| H | -4.986441 | -3.619371 | 2.902470  | C                                        | 3.266801  | 2.432012  | 5.551009  |
| H | -6.100244 | -3.253072 | 4.255045  | C                                        | 1.872918  | 2.296657  | 5.633328  |
| H | -4.359146 | -3.508674 | 4.581229  | H                                        | 1.277042  | 1.961780  | 4.771675  |
| C | -5.825120 | -0.988076 | 2.637890  | H                                        | 0.146368  | 2.513383  | 6.952980  |
| H | -5.736189 | -1.508167 | 1.661298  | H                                        | 3.754075  | 3.452037  | 8.794238  |
| H | -5.651721 | 0.094058  | 2.467913  | H                                        | 3.798035  | 2.204331  | 4.614157  |
| H | -6.869672 | -1.109994 | 2.987650  | H                                        | 5.062489  | 2.976336  | 6.672774  |
| C | -7.773455 | -0.287129 | 7.603680  | H                                        | -0.475618 | 12.970661 | 9.754366  |
| C | -8.848558 | 0.314417  | 6.667352  | H                                        | 1.860191  | 13.844269 | 10.410526 |
| H | -8.631384 | 1.378734  | 6.443559  | Cl                                       | -0.934431 | 8.998614  | 13.241500 |
| H | -9.850239 | 0.261521  | 7.142672  | C                                        | -2.526434 | 8.269632  | 12.755175 |
| H | -8.907519 | -0.226822 | 5.701937  | Cl                                       | -3.798479 | 8.572723  | 13.950686 |
| C | -8.115017 | -1.767793 | 7.896480  | H                                        | -2.344082 | 7.186366  | 12.652119 |
| H | -8.152965 | -2.375419 | 6.970208  | H                                        | -2.780386 | 8.723516  | 11.779397 |
| H | -9.105762 | -1.846557 | 8.390915  |                                          |           |           |           |
| H | -7.359896 | -2.224804 | 8.568060  |                                          |           |           |           |
| C | -7.805163 | 0.487582  | 8.934557  | <b>1d<sub>2</sub>(py), S = 1 + S = 0</b> |           |           |           |
| H | -7.587110 | 1.565276  | 8.791946  | Ni                                       | 1.814242  | 2.022876  | 0.028183  |
| H | -7.077442 | 0.084131  | 9.667321  | N                                        | 3.256551  | 2.700751  | -0.916677 |
| H | -8.813023 | 0.409892  | 9.390589  | N                                        | 2.594200  | 0.392841  | 0.499823  |
| H | -7.027393 | -1.399315 | 5.224378  | O                                        | 0.965474  | 3.647758  | -0.288701 |
| H | -2.909185 | -0.073907 | 5.108980  | O                                        | 0.339668  | 1.475161  | 1.052223  |
| H | -5.403810 | 1.004903  | 8.446986  | C                                        | 3.061639  | 4.002626  | -1.276962 |
| C | 5.191404  | 11.357985 | 13.965186 | C                                        | 4.411435  | 2.073726  | -1.236188 |
| H | 3.848336  | 9.664487  | 14.026743 | C                                        | 3.791141  | -0.098155 | 0.113517  |
| H | 3.121410  | 11.155577 | 13.374014 | C                                        | 1.781096  | -0.356173 | 1.302028  |
| C | 6.437720  | 11.447949 | 13.324460 | C                                        | 1.692257  | 4.541204  | -0.914794 |
| C | 7.493375  | 12.188489 | 13.895965 | C                                        | 0.433059  | 0.270220  | 1.516225  |
| C | 7.254748  | 12.829652 | 15.127286 | C                                        | 4.032509  | 4.744798  | -1.943860 |
| C | 6.014502  | 12.761259 | 15.798429 | C                                        | 5.427316  | 2.776650  | -1.914518 |
| C | 4.986965  | 12.014317 | 15.193981 | C                                        | 4.579730  | 0.559484  | -1.031299 |
| H | 4.001670  | 11.935273 | 15.676915 | C                                        | 4.237494  | -1.338542 | 0.611131  |
| H | 8.068602  | 13.412789 | 15.585740 | C                                        | 2.153772  | -1.602151 | 1.802301  |
| H | 6.562543  | 10.929082 | 12.366417 | O                                        | 1.349422  | 5.680967  | -1.207867 |
| C | 8.875481  | 12.313318 | 13.219963 | O                                        | -0.508643 | -0.359556 | 2.041552  |
| C | 8.947675  | 11.530107 | 11.895596 | C                                        | 5.247915  | 4.121534  | -2.261293 |
|   |           |           |           | C                                        | 4.086857  | -0.121408 | -2.331639 |

|    |            |           |           |   |            |           |           |
|----|------------|-----------|-----------|---|------------|-----------|-----------|
| O  | 5.967885   | 0.245803  | -0.915560 | H | -12.047587 | 1.179463  | -2.396236 |
| C  | 3.425474   | -2.088266 | 1.471006  | C | -10.047736 | 2.955900  | 1.556117  |
| Ni | -1.407105  | -1.651085 | 0.409536  | C | -10.611622 | 4.052720  | 0.621510  |
| C  | 6.644220   | 0.754082  | 0.232337  | H | -9.823746  | 4.444303  | -0.053653 |
| N  | -2.209412  | 0.028926  | -0.383091 | H | -11.007473 | 4.902552  | 1.215891  |
| N  | -2.967817  | -1.984733 | 1.623541  | H | -11.438892 | 3.673187  | -0.011007 |
| O  | 0.146591   | -1.162753 | -0.848194 | C | -11.175451 | 2.438956  | 2.481293  |
| O  | -0.619309  | -3.258620 | 1.355605  | H | -12.019229 | 2.009317  | 1.905029  |
| C  | -1.419836  | 0.560868  | -1.348544 | H | -11.578781 | 3.267001  | 3.100934  |
| C  | -3.380972  | 0.609379  | -0.058267 | H | -10.799417 | 1.651045  | 3.165255  |
| C  | -4.092403  | -1.255633 | 1.748774  | C | -8.952690  | 3.587978  | 2.435865  |
| C  | -2.815438  | -3.157938 | 2.282820  | H | -8.120418  | 3.999566  | 1.829880  |
| C  | -0.055829  | -0.103209 | -1.552422 | H | -8.525646  | 2.859565  | 3.154447  |
| C  | -1.455007  | -3.862835 | 2.142367  | H | -9.380093  | 4.424435  | 3.025380  |
| C  | -1.793351  | 1.698723  | -2.069793 | H | -11.426158 | 1.413999  | -0.225994 |
| C  | -3.824875  | 1.748534  | -0.764459 | H | -8.222858  | -1.207825 | -1.487735 |
| C  | -4.174607  | 0.193980  | 1.208150  | H | -7.442912  | 1.860768  | 1.428621  |
| C  | -5.155996  | -1.734182 | 2.544526  | C | 8.084953   | 0.290697  | 0.235601  |
| C  | -3.830738  | -3.683716 | 3.088789  | H | 6.135388   | 0.409687  | 1.165340  |
| O  | 0.756217   | 0.448480  | -2.318980 | H | 6.606873   | 1.869030  | 0.253573  |
| O  | -1.269169  | -4.902794 | 2.779379  | C | 8.524366   | -0.738619 | -0.612793 |
| C  | -3.030597  | 2.288305  | -1.783839 | C | 9.862050   | -1.183700 | -0.577558 |
| O  | -5.553338  | 0.545342  | 1.033370  | C | 10.737025  | -0.562804 | 0.335578  |
| C  | -3.645137  | 1.099660  | 2.345015  | C | 10.330399  | 0.476210  | 1.200355  |
| C  | -5.026636  | -2.963284 | 3.205998  | C | 8.988219   | 0.892774  | 1.131948  |
| H  | 6.346701   | 2.233779  | -2.174291 | H | 8.625793   | 1.702677  | 1.782290  |
| H  | 6.045291   | 4.668469  | -2.786762 | H | 11.785220  | -0.898075 | 0.373988  |
| H  | -3.366480  | 3.183826  | -2.328590 | H | 7.799353   | -1.177329 | -1.309178 |
| H  | -1.088155  | 2.093913  | -2.813653 | C | 10.383055  | -2.308949 | -1.496749 |
| H  | -6.061718  | -1.121617 | 2.651611  | C | 9.275859   | -2.877647 | -2.404130 |
| H  | -5.854148  | -3.342500 | 3.825706  | H | 8.856022   | -2.106140 | -3.080797 |
| H  | -3.634336  | -4.636913 | 3.600326  | H | 8.440858   | -3.310103 | -1.816564 |
| H  | 3.790584   | 5.787828  | -2.195980 | H | 9.689283   | -3.687033 | -3.039618 |
| H  | 5.215102   | -1.713211 | 0.277550  | C | 11.510603  | -1.751709 | -2.398425 |
| H  | 1.418722   | -2.177008 | 2.384040  | H | 11.138699  | -0.921466 | -3.032796 |
| H  | 2.992458   | 0.031914  | -2.450870 | H | 11.901024  | -2.546649 | -3.067738 |
| H  | 4.292207   | -1.207929 | -2.269808 | H | 12.362248  | -1.364892 | -1.803842 |
| H  | 4.627729   | 0.300231  | -3.201353 | C | 10.939496  | -3.464101 | -0.630506 |
| H  | 3.768279   | -3.063625 | 1.847331  | H | 10.150159  | -3.887496 | 0.023491  |
| H  | -4.777818  | 2.214833  | -0.479358 | H | 11.771956  | -3.130566 | 0.020725  |
| C  | -6.262021  | -0.154505 | 0.019782  | H | 11.325580  | -4.281158 | -1.275117 |
| H  | -3.762543  | 2.163432  | 2.060769  | C | 11.354202  | 1.113812  | 2.163267  |
| H  | -2.570854  | 0.883899  | 2.509749  | C | 10.728657  | 2.222420  | 3.030668  |
| H  | -4.213938  | 0.905031  | 3.275160  | H | 10.326338  | 3.052926  | 2.415667  |
| C  | -7.706860  | 0.296660  | -0.021108 | H | 11.498212  | 2.652043  | 3.703455  |
| H  | -6.219660  | -1.256413 | 0.196774  | H | 9.908308   | 1.836911  | 3.669604  |
| H  | -5.789993  | 0.019837  | -0.978485 | C | 11.919839  | 0.023549  | 3.104554  |
| C  | -8.599445  | -0.369724 | -0.882300 | H | 12.426214  | -0.786732 | 2.542904  |
| C  | -9.948275  | 0.018942  | -0.973179 | H | 11.112380  | -0.439067 | 3.707796  |
| C  | -10.372790 | 1.098344  | -0.168143 | H | 12.662597  | 0.461930  | 3.803280  |
| C  | -9.508362  | 1.786074  | 0.705732  | C | 12.508780  | 1.735640  | 1.341640  |
| C  | -8.163098  | 1.366115  | 0.765868  | H | 12.131943  | 2.525812  | 0.660684  |
| C  | -10.959888 | -0.684807 | -1.902353 | H | 13.030683  | 0.979170  | 0.722085  |
| C  | -10.317472 | -1.834399 | -2.701308 | H | 13.261974  | 2.194141  | 2.015917  |
| H  | -9.907914  | -2.622507 | -2.037195 | N | -2.083463  | -2.931202 | -1.093589 |
| H  | -9.499090  | -1.475951 | -3.358418 | C | -1.225146  | -3.903931 | -1.467004 |
| H  | -11.078675 | -2.312025 | -3.351008 | C | -3.256426  | -2.808818 | -1.743262 |
| C  | -12.113255 | -1.271557 | -1.053801 | C | -1.516977  | -4.789910 | -2.512164 |
| H  | -12.858108 | -1.773698 | -1.705931 | C | -2.737359  | -4.664908 | -3.191535 |
| H  | -12.645832 | -0.486969 | -0.480138 | C | -3.626436  | -3.654046 | -2.797026 |
| H  | -11.733539 | -2.019138 | -0.327831 | H | -4.596482  | -3.515791 | -3.296571 |
| C  | -11.531578 | 0.342912  | -2.908190 | H | -3.922196  | -1.998954 | -1.403147 |
| H  | -12.267294 | -0.142373 | -3.583076 | H | -0.296184  | -3.964868 | -0.880157 |
| H  | -10.725831 | 0.777715  | -3.534035 | H | -2.993889  | -5.346808 | -4.016750 |

|                                      |           |           |           |   |            |           |           |
|--------------------------------------|-----------|-----------|-----------|---|------------|-----------|-----------|
| H                                    | -0.789553 | -5.569053 | -2.782474 | H | -4.095737  | 3.233002  | 10.301517 |
|                                      |           |           |           | H | -2.472927  | 3.148611  | 11.090603 |
| <b>1d<sub>2</sub>(py), 2 · S = 1</b> |           |           |           | H | -3.558458  | 1.695099  | 11.081740 |
| Ni                                   | -0.398470 | 7.934779  | 10.374335 | C | -4.426176  | 0.198649  | 6.548991  |
| N                                    | 0.187407  | 9.847294  | 10.376612 | H | -2.383256  | 0.219783  | 7.255486  |
| N                                    | 1.183988  | 7.347264  | 11.487630 | H | -2.923228  | 1.750508  | 6.507476  |
| O                                    | -2.102193 | 8.661690  | 9.703206  | C | -4.224500  | -0.500134 | 5.343642  |
| O                                    | -1.111980 | 6.111442  | 10.956533 | C | -5.284702  | -1.168741 | 4.705012  |
| C                                    | -0.823158 | 10.652309 | 9.968783  | C | -6.555368  | -1.112878 | 5.317765  |
| C                                    | 1.365003  | 10.358190 | 10.786375 | C | -6.792233  | -0.427199 | 6.525214  |
| C                                    | 2.309745  | 8.042493  | 11.734623 | C | -5.702428  | 0.230140  | 7.133395  |
| C                                    | 1.077310  | 6.049911  | 11.871905 | C | -5.103965  | -1.951874 | 3.387241  |
| C                                    | -2.120294 | 9.949575  | 9.537599  | C | -3.654580  | -1.894940 | 2.868983  |
| C                                    | -0.196853 | 5.350807  | 11.422660 | H | -2.938583  | -2.337991 | 3.590809  |
| C                                    | -0.691082 | 12.043974 | 9.946926  | H | -3.331552  | -0.855795 | 2.655006  |
| C                                    | 1.561561  | 11.755121 | 10.785799 | H | -3.570360  | -2.469517 | 1.924345  |
| C                                    | 2.564622  | 9.427567  | 11.087512 | C | -5.476067  | -3.435985 | 3.619007  |
| C                                    | 3.370885  | 7.438610  | 12.443337 | H | -5.357055  | -4.016363 | 2.680290  |
| C                                    | 2.098104  | 5.385235  | 12.557864 | H | -6.526045  | -3.552212 | 3.954022  |
| O                                    | -3.043083 | 10.637356 | 9.099023  | H | -4.824353  | -3.894134 | 4.390628  |
| O                                    | -0.239066 | 4.091856  | 11.464739 | C | -6.029775  | -1.351779 | 2.302282  |
| C                                    | 0.523813  | 12.600478 | 10.367380 | H | -5.919074  | -1.907107 | 1.347562  |
| C                                    | 3.246776  | 9.144231  | 9.728717  | H | -5.782160  | -0.287742 | 2.111294  |
| O                                    | 3.524325  | 10.144262 | 11.869471 | H | -7.097227  | -1.400666 | 2.596041  |
| C                                    | 3.258423  | 6.107501  | 12.864859 | C | -8.210065  | -0.414834 | 7.135358  |
| Ni                                   | 0.586352  | 3.342681  | 9.501630  | C | -9.193264  | 0.232302  | 6.130828  |
| C                                    | 3.132710  | 10.503078 | 13.191975 | H | -8.898573  | 1.276686  | 5.901901  |
| N                                    | -1.074900 | 4.074458  | 8.599774  | H | -10.220796 | 0.250000  | 6.550389  |
| N                                    | -0.230922 | 1.557452  | 9.878147  | H | -9.232450  | -0.323837 | 5.172850  |
| O                                    | 1.293045  | 5.255079  | 9.055351  | C | -8.654887  | -1.867493 | 7.428823  |
| O                                    | 2.156837  | 2.599419  | 10.523992 | H | -8.675824  | -2.488558 | 6.510928  |
| C                                    | -0.917455 | 5.356087  | 8.182438  | H | -9.675519  | -1.879407 | 7.865097  |
| C                                    | -2.247518 | 3.439436  | 8.419170  | H | -7.968464  | -2.355872 | 8.150189  |
| C                                    | -1.467556 | 1.128844  | 9.564767  | C | -8.270060  | 0.383204  | 8.451373  |
| C                                    | 0.681323  | 0.726909  | 10.436028 | H | -7.986556  | 1.445137  | 8.305769  |
| C                                    | 0.381882  | 6.016749  | 8.613236  | H | -7.605052  | -0.046053 | 9.227795  |
| C                                    | 2.035802  | 1.344198  | 10.826548 | H | -9.303473  | 0.367730  | 8.853424  |
| C                                    | -1.920017 | 6.051755  | 7.500558  | H | -7.396574  | -1.631411 | 4.831848  |
| C                                    | -3.289779 | 4.071367  | 7.704220  | H | -3.215159  | -0.517550 | 4.906011  |
| C                                    | -2.585130 | 2.126055  | 9.172361  | H | -5.823547  | 0.775729  | 8.077060  |
| C                                    | -1.818288 | -0.221491 | 9.779732  | C | 4.099572   | 11.513654 | 13.772454 |
| C                                    | 0.393124  | -0.620503 | 10.677655 | H | 3.095388   | 9.599675  | 13.846927 |
| O                                    | 0.438997  | 7.290015  | 8.583310  | H | 2.101047   | 10.927564 | 13.196850 |
| O                                    | 2.866051  | 0.621921  | 11.383564 | C | 5.245633   | 11.920520 | 13.070792 |
| C                                    | -3.117013 | 5.376290  | 7.228464  | C | 6.140913   | 12.857042 | 13.629057 |
| O                                    | -3.607591 | 1.423446  | 8.457487  | C | 5.844853   | 13.367531 | 14.907854 |
| C                                    | -3.224822 | 2.580622  | 10.506444 | C | 4.702190   | 12.980322 | 15.641367 |
| C                                    | -0.874942 | -1.102185 | 10.327217 | C | 3.835835   | 12.042976 | 15.050116 |
| H                                    | 2.532794  | 12.161526 | 11.098574 | H | 2.932633   | 11.710150 | 15.582745 |
| H                                    | 0.673786  | 13.691322 | 10.365771 | H | 6.534436   | 14.099009 | 15.356713 |
| H                                    | -3.931990 | 5.879449  | 6.686617  | H | 5.422870   | 11.486604 | 12.079311 |
| H                                    | -1.755686 | 7.105540  | 7.239445  | C | 7.416041   | 13.322987 | 12.894103 |
| H                                    | -2.836596 | -0.555102 | 9.537324  | C | 7.557270   | 12.674421 | 11.504218 |
| H                                    | -1.142656 | -2.157024 | 10.495269 | H | 6.704450   | 12.925365 | 10.841483 |
| H                                    | 1.178370  | -1.235138 | 11.140788 | H | 7.629444   | 11.569829 | 11.567028 |
| H                                    | -1.549475 | 12.634587 | 9.595799  | H | 8.480842   | 13.040447 | 11.011517 |
| H                                    | 4.289136  | 8.015662  | 12.618736 | C | 7.373713   | 14.858747 | 12.709920 |
| H                                    | 1.974274  | 4.318621  | 12.789391 | H | 6.494158   | 15.164072 | 12.107190 |
| H                                    | 2.557824  | 8.561367  | 9.085453  | H | 8.287043   | 15.211563 | 12.186797 |
| H                                    | 4.171956  | 8.558783  | 9.894327  | H | 7.318002   | 15.391956 | 13.680074 |
| H                                    | 3.504375  | 10.100881 | 9.233649  | C | 8.656699   | 12.939819 | 13.736400 |
| H                                    | 4.090051  | 5.626924  | 13.402319 | H | 8.714178   | 11.841840 | 13.881681 |
| H                                    | -4.241333 | 3.539321  | 7.568407  | H | 8.636682   | 13.411012 | 14.739409 |
| C                                    | -3.251356 | 0.917788  | 7.177793  | H | 9.587927   | 13.268574 | 13.229302 |

|                                                  |           |           |           |   |           |           |           |
|--------------------------------------------------|-----------|-----------|-----------|---|-----------|-----------|-----------|
| C                                                | 4.444841  | 13.586130 | 17.037469 | C | -1.415926 | 0.029881  | 9.903258  |
| C                                                | 3.155177  | 13.042296 | 17.680080 | C | 0.800403  | -0.408972 | 10.769111 |
| H                                                | 2.257693  | 13.279396 | 17.073322 | O | 0.873894  | 7.564120  | 8.952065  |
| H                                                | 3.009773  | 13.501295 | 18.678999 | O | 3.274790  | 0.796386  | 11.521410 |
| H                                                | 3.194340  | 11.943297 | 17.823069 | C | -2.723865 | 5.728019  | 7.594469  |
| C                                                | 5.632060  | 13.245756 | 17.969837 | O | -3.219914 | 1.730210  | 8.681378  |
| H                                                | 6.589649  | 13.650133 | 17.585331 | C | -2.806385 | 2.810219  | 10.765717 |
| H                                                | 5.750171  | 12.148494 | 18.079389 | C | -0.469422 | -0.874894 | 10.404295 |
| H                                                | 5.467818  | 13.676202 | 18.979717 | H | 3.492171  | 12.166017 | 11.036328 |
| C                                                | 4.312201  | 15.122903 | 16.912231 | H | -3.541409 | 6.254537  | 7.078759  |
| H                                                | 3.464800  | 15.396246 | 16.251016 | H | -1.354423 | 7.451366  | 7.663252  |
| H                                                | 5.228350  | 15.585220 | 16.493451 | H | -2.434969 | -0.293480 | 9.650664  |
| H                                                | 4.131474  | 15.578921 | 17.908048 | H | -0.735818 | -1.936663 | 10.524248 |
| N                                                | 1.525230  | 2.713414  | 7.733883  | H | 1.589219  | -1.043381 | 11.198273 |
| C                                                | 2.866447  | 2.860953  | 7.687886  | H | 4.911249  | 7.989922  | 12.813808 |
| C                                                | 0.881330  | 2.247721  | 6.646848  | H | 2.411757  | 4.421169  | 13.023864 |
| C                                                | 3.608953  | 2.548452  | 6.541613  | H | 3.104285  | 8.510664  | 9.330769  |
| C                                                | 2.941156  | 2.064220  | 5.407584  | H | 4.740045  | 8.407667  | 10.093614 |
| C                                                | 1.548100  | 1.908194  | 5.462860  | H | 4.185573  | 9.967642  | 9.370668  |
| H                                                | 0.978502  | 1.529207  | 4.601716  | H | 4.598681  | 5.618067  | 13.608472 |
| H                                                | -0.212680 | 2.144905  | 6.732483  | H | -3.854041 | 3.882715  | 7.873464  |
| H                                                | 3.334553  | 3.215915  | 8.619066  | C | -2.884940 | 1.274598  | 7.377478  |
| H                                                | 3.498296  | 1.808970  | 4.493143  | H | -3.682785 | 3.464879  | 10.593597 |
| H                                                | 4.700404  | 2.682579  | 6.548660  | H | -2.047009 | 3.361820  | 11.356402 |
| <b>1d<sub>z</sub>(py)<sub>2</sub>, 2 · S = 1</b> |           |           |           |   |           |           |           |
| Ni                                               | 0.065556  | 8.269445  | 10.928387 | H | -3.128340 | 1.904874  | 11.316483 |
| N                                                | 0.885754  | 10.067966 | 10.610836 | C | -4.042843 | 0.507963  | 6.773860  |
| N                                                | 1.731993  | 7.505883  | 11.795420 | H | -1.979688 | 0.621667  | 7.405780  |
| O                                                | -1.512777 | 9.062575  | 9.943081  | H | -2.626453 | 2.138732  | 6.716917  |
| O                                                | -0.650969 | 6.365695  | 11.326182 | C | -3.849380 | -0.156023 | 5.547549  |
| C                                                | -0.029772 | 10.924070 | 10.098625 | C | -4.896228 | -0.866255 | 4.932301  |
| C                                                | 2.123681  | 10.483605 | 10.937918 | C | -6.145122 | -0.889345 | 5.590292  |
| C                                                | 2.909349  | 8.129094  | 11.987810 | C | -6.373496 | -0.238908 | 6.818741  |
| C                                                | 1.570953  | 6.209830  | 12.163060 | C | -5.297942 | 0.463193  | 7.401628  |
| C                                                | -1.388462 | 10.327175 | 9.690187  | C | -4.724165 | -1.613967 | 3.593067  |
| C                                                | 0.257123  | 5.568589  | 11.734774 | C | -3.302234 | -1.465494 | 3.019643  |
| C                                                | 0.256768  | 12.281436 | 9.917948  | H | -2.533981 | -1.879011 | 3.704228  |
| C                                                | 2.473122  | 11.842633 | 10.783774 | H | -3.047010 | -0.406205 | 2.812736  |
| C                                                | 3.242428  | 9.468128  | 11.279483 | H | -3.223882 | -2.018511 | 2.061726  |
| C                                                | 3.956069  | 7.467315  | 12.666830 | C | -5.003174 | -3.120600 | 3.809720  |
| C                                                | 2.579195  | 5.484609  | 12.806604 | H | -4.892348 | -3.676994 | 2.855549  |
| O                                                | -2.217639 | 11.076024 | 9.165792  | H | -6.029995 | -3.301455 | 4.185628  |
| O                                                | 0.183374  | 4.308392  | 11.735150 | H | -4.295053 | -3.555046 | 4.544481  |
| C                                                | 1.526601  | 12.747381 | 10.282716 | C | -5.725016 | -1.048129 | 2.557371  |
| C                                                | 3.863634  | 9.062301  | 9.921451  | H | -5.618899 | -1.576146 | 1.586735  |
| O                                                | 4.277108  | 10.142370 | 12.005771 | H | -5.547618 | 0.032483  | 2.382006  |
| C                                                | 3.781141  | 6.144563  | 13.092730 | H | -6.775723 | -1.166414 | 2.889557  |
| Ni                                               | 0.991701  | 3.603083  | 9.758826  | C | -7.766416 | -0.313470 | 7.479734  |
| C                                                | 3.942122  | 10.597976 | 13.309666 | C | -8.823933 | 0.278686  | 6.517793  |
| N                                                | -0.674730 | 4.366640  | 8.891726  | H | -8.602812 | 1.340914  | 6.288052  |
| N                                                | 0.171444  | 1.804544  | 10.076329 | H | -9.834508 | 0.229581  | 6.974484  |
| O                                                | 1.708233  | 5.506809  | 9.361035  | H | -8.864337 | -0.271750 | 5.556640  |
| O                                                | 2.570014  | 2.809850  | 10.744096 | C | -8.112455 | -1.791919 | 7.778432  |
| C                                                | -0.513655 | 5.662690  | 8.524085  | H | -8.131569 | -2.407083 | 6.856556  |
| C                                                | -1.852115 | 3.743459  | 8.699367  | H | -9.112676 | -1.867783 | 8.254020  |
| C                                                | -1.066469 | 1.388913  | 9.749188  | H | -7.370089 | -2.242566 | 8.468262  |
| C                                                | 1.086955  | 0.948404  | 10.588513 | C | -7.824701 | 0.472750  | 8.802982  |
| C                                                | 0.800157  | 6.303918  | 8.952418  | H | -7.603884 | 1.549170  | 8.655084  |
| C                                                | 2.445647  | 1.545249  | 10.996987 | H | -7.111147 | 0.076396  | 9.553340  |
| C                                                | -1.521891 | 6.387941  | 7.880550  | H | -8.841384 | 0.398501  | 9.239790  |
| C                                                | -2.898828 | 4.405277  | 8.020389  | H | -6.974771 | -1.443034 | 5.123574  |
| C                                                | -2.185204 | 2.404418  | 9.407662  | H | -2.856704 | -0.112901 | 5.075054  |
|                                                  |           |           |           | H | -5.412855 | 0.986524  | 8.358512  |
|                                                  |           |           |           | C | 5.100278  | 11.363997 | 13.913576 |
|                                                  |           |           |           | H | 3.683106  | 9.733879  | 13.970070 |

|   |           |           |           |                                                  |           |           |           |
|---|-----------|-----------|-----------|--------------------------------------------------|-----------|-----------|-----------|
| H | 3.037183  | 11.251341 | 13.281294 | <b>1d<sub>2</sub>(py)<sub>3</sub>, 2 · S = 1</b> |           |           |           |
| C | 6.355541  | 11.408145 | 13.286089 | Ni                                               | -1.037977 | 5.518284  | 9.933738  |
| C | 7.431317  | 12.109688 | 13.869237 | N                                                | -0.440286 | 7.430690  | 10.230473 |
| C | 7.202990  | 12.760222 | 15.097641 | N                                                | 0.839433  | 4.778594  | 10.202731 |
| C | 5.953940  | 12.737733 | 15.755356 | O                                                | -2.882708 | 6.384930  | 9.831063  |
| C | 4.906871  | 12.028044 | 15.139861 | O                                                | -1.499353 | 3.519732  | 9.833011  |
| H | 3.914077  | 11.985387 | 15.612153 | C                                                | -1.509269 | 8.254054  | 10.376150 |
| H | 8.032803  | 13.313497 | 15.564559 | C                                                | 0.814770  | 7.894617  | 10.394472 |
| H | 6.470393  | 10.884798 | 12.329206 | C                                                | 1.983847  | 5.474614  | 10.345276 |
| C | 8.824433  | 12.183530 | 13.208581 | C                                                | 0.832133  | 3.423302  | 10.330381 |
| C | 8.882597  | 11.397362 | 11.885297 | C                                                | -2.901537 | 7.638794  | 10.148184 |
| H | 8.169459  | 11.794176 | 11.134787 | C                                                | -0.524925 | 2.747515  | 10.131039 |
| H | 8.661121  | 10.321059 | 12.033071 | C                                                | -1.360490 | 9.608347  | 10.694149 |
| H | 9.899433  | 11.471052 | 11.448753 | C                                                | 1.030123  | 9.254786  | 10.706821 |
| C | 9.171374  | 13.661805 | 12.910050 | C                                                | 2.055512  | 7.007934  | 10.104467 |
| H | 8.429463  | 14.112891 | 12.220019 | C                                                | 3.196377  | 4.797413  | 10.601277 |
| H | 10.171774 | 13.737122 | 12.434753 | C                                                | 1.993656  | 2.694907  | 10.616593 |
| H | 9.190569  | 14.276918 | 13.831957 | O                                                | -3.889375 | 8.374182  | 10.257663 |
| C | 9.881381  | 11.590731 | 14.170744 | O                                                | -0.619381 | 1.504798  | 10.279848 |
| H | 9.659609  | 10.528618 | 14.400391 | C                                                | -0.065511 | 10.114553 | 10.861808 |
| H | 9.921866  | 12.141096 | 15.131935 | C                                                | 2.420974  | 7.218927  | 8.617873  |
| H | 10.892096 | 11.639285 | 13.714302 | O                                                | 3.172943  | 7.535563  | 10.833732 |
| C | 5.781954  | 13.485531 | 17.094554 | C                                                | 3.195195  | 3.405563  | 10.745280 |
| C | 4.359861  | 13.337668 | 17.667734 | Ni                                               | 0.249233  | -0.360658 | 9.547527  |
| H | 3.591901  | 13.751560 | 16.983049 | C                                                | 3.109484  | 7.467598  | 12.253692 |
| H | 4.281603  | 13.890678 | 18.625662 | N                                                | -1.200584 | -0.195037 | 8.133675  |
| H | 4.104131  | 12.278483 | 17.874550 | N                                                | -1.024188 | -1.139091 | 10.924785 |
| C | 6.782378  | 12.919306 | 18.130446 | O                                                | 1.342362  | 0.658554  | 8.169637  |
| H | 7.833198  | 13.037126 | 17.798452 | O                                                | 1.550854  | -0.392194 | 11.108847 |
| H | 6.604481  | 11.838778 | 18.305827 | C                                                | -0.772078 | 0.545301  | 7.080446  |
| H | 6.676314  | 13.447409 | 19.101041 | C                                                | -2.488300 | -0.573086 | 8.223081  |
| C | 6.061637  | 14.992041 | 16.877897 | C                                                | -2.332183 | -1.414507 | 10.777549 |
| H | 5.353796  | 15.426767 | 16.143032 | C                                                | -0.455788 | -1.136404 | 12.155875 |
| H | 7.088582  | 15.172436 | 16.502108 | C                                                | 0.680800  | 1.046106  | 7.135717  |
| H | 5.950929  | 15.548513 | 17.832036 | C                                                | 1.012562  | -0.690292 | 12.249492 |
| N | 1.909485  | 3.028451  | 7.959452  | C                                                | -1.617625 | 0.879024  | 6.017373  |
| C | 3.248689  | 3.187405  | 7.902095  | C                                                | -3.395712 | -0.254924 | 7.188028  |
| C | 1.254011  | 2.605791  | 6.862252  | C                                                | -3.049262 | -1.417545 | 9.401379  |
| C | 3.977743  | 2.928936  | 6.733887  | C                                                | -3.110658 | -1.780033 | 11.898334 |
| C | 3.297655  | 2.489742  | 5.588783  | C                                                | -1.171931 | -1.488832 | 13.304492 |
| C | 1.906425  | 2.322419  | 5.655560  | O                                                | 1.083826  | 1.777622  | 6.215864  |
| H | 1.327481  | 1.978118  | 4.786059  | O                                                | 1.542161  | -0.653489 | 13.364135 |
| H | 0.161657  | 2.493739  | 6.958337  | C                                                | -2.953228 | 0.461662  | 6.071035  |
| H | 3.725937  | 3.508326  | 8.840883  | C                                                | -3.137422 | -2.882764 | 8.925108  |
| H | 3.843945  | 2.278460  | 4.656709  | O                                                | -4.400214 | -0.991654 | 9.617471  |
| H | 5.068342  | 3.070272  | 6.731909  | C                                                | -2.523109 | -1.830820 | 13.168134 |
| N | -0.852266 | 8.844060  | 12.727709 | C                                                | -4.532341 | 0.364393  | 10.094146 |
| C | -0.196917 | 9.267278  | 13.824759 | H                                                | -0.635253 | -1.467487 | 14.263903 |
| C | -0.849416 | 9.550844  | 15.031364 | H                                                | -2.274501 | 10.211643 | 10.791685 |
| C | -2.240594 | 9.383109  | 15.098191 | H                                                | 4.125675  | 5.378414  | 10.680054 |
| C | -2.920552 | 8.943333  | 13.953231 | H                                                | 1.946674  | 1.599249  | 10.736417 |
| C | -2.191419 | 8.684714  | 12.785103 | H                                                | 1.607878  | 6.842622  | 7.969940  |
| H | 0.895405  | 9.379638  | 13.728616 | H                                                | 3.353041  | 6.670484  | 8.380261  |
| H | -0.270582 | 9.895610  | 15.900757 | H                                                | 2.574202  | 8.297543  | 8.418604  |
| H | -0.532052 | 12.915820 | 9.488753  | H                                                | 4.132974  | 2.868969  | 10.954491 |
| H | 1.792985  | 13.809149 | 10.162718 | H                                                | -4.445968 | -0.558376 | 7.286979  |
| H | -4.011108 | 8.801662  | 13.955269 | H                                                | -3.730954 | -2.944045 | 7.992304  |
| H | -2.786951 | 9.594523  | 16.030199 | H                                                | -3.622733 | -3.507280 | 9.700155  |
| H | -2.668581 | 8.363355  | 11.846425 | H                                                | -2.121979 | -3.278886 | 8.730831  |
|   |           |           |           | N                                                | 1.024360  | -2.189486 | 8.857432  |
|   |           |           |           | H                                                | 2.059406  | 9.622890  | 10.815086 |
|   |           |           |           | H                                                | -1.198613 | 1.469143  | 5.190563  |
|   |           |           |           | H                                                | -4.174311 | -2.011591 | 11.749940 |
|   |           |           |           | C                                                | 1.240849  | -2.401584 | 7.543276  |

|   |           |           |           |   |            |           |           |
|---|-----------|-----------|-----------|---|------------|-----------|-----------|
| C | 1.416802  | -3.136803 | 9.733948  | H | 6.089910   | 12.149239 | 11.732961 |
| C | 2.025685  | -4.332503 | 9.331827  | H | 5.737566   | 11.017979 | 10.390587 |
| C | 2.244703  | -4.556081 | 7.964923  | H | 7.238805   | 11.993443 | 10.362022 |
| C | 1.843410  | -3.567884 | 7.054592  | C | 7.942109   | 9.340792  | 10.754982 |
| H | 0.925363  | -1.599778 | 6.860269  | H | 8.501071   | 8.531831  | 11.267873 |
| H | 2.327647  | -5.070205 | 10.089553 | H | 8.650237   | 9.879298  | 10.090973 |
| H | 1.245941  | -2.916927 | 10.797281 | H | 7.175020   | 8.864343  | 10.112613 |
| H | 1.997774  | -3.687697 | 5.972282  | C | -5.651840  | 1.098191  | 9.390022  |
| H | 2.724669  | -5.482915 | 7.615170  | H | -3.577623  | 0.923530  | 9.976811  |
| N | -1.451385 | 5.284453  | 12.060064 | H | -4.739088  | 0.327199  | 11.190210 |
| C | -2.694139 | 4.866420  | 12.375926 | C | -5.537819  | 2.478913  | 9.171234  |
| C | -3.078270 | 4.589044  | 13.694706 | C | -6.589536  | 3.217770  | 8.582117  |
| C | -0.551726 | 5.441290  | 13.048572 | C | -7.746080  | 2.511826  | 8.204254  |
| C | -0.849354 | 5.188028  | 14.394116 | C | -7.889248  | 1.116559  | 8.395898  |
| C | -2.140312 | 4.750728  | 14.724255 | C | -6.826572  | 0.422422  | 8.999448  |
| H | -2.410305 | 4.538370  | 15.770102 | H | -6.883634  | -0.660794 | 9.171540  |
| H | -4.104151 | 4.251628  | 13.902308 | H | -8.574166  | 3.063369  | 7.737736  |
| H | -0.076507 | 5.328392  | 15.163926 | H | -4.601628  | 2.983925  | 9.459901  |
| H | 0.452935  | 5.780235  | 12.747150 | C | -6.430696  | 4.739199  | 8.381219  |
| H | -3.392315 | 4.773244  | 11.530689 | C | -6.261938  | 5.414859  | 9.763377  |
| N | -0.882443 | 5.590616  | 7.802386  | H | -5.399988  | 4.991556  | 10.313155 |
| C | -1.533622 | 6.536334  | 7.091877  | H | -7.172336  | 5.275837  | 10.382598 |
| C | -1.486511 | 6.595234  | 5.693195  | H | -6.057251  | 6.499888  | 9.659169  |
| C | -0.742891 | 5.630411  | 4.995921  | C | -7.649613  | 5.366767  | 7.679738  |
| C | -0.078158 | 4.638185  | 5.729190  | H | -7.489092  | 6.457663  | 7.564235  |
| C | -0.177606 | 4.659207  | 7.127138  | H | -8.582537  | 5.231569  | 8.264595  |
| H | -2.127484 | 7.256617  | 7.671978  | H | -7.811878  | 4.942893  | 6.667146  |
| H | 0.340230  | 3.888744  | 7.715291  | C | -5.176986  | 5.013233  | 7.515777  |
| H | 0.507676  | 3.826793  | 5.272412  | H | -5.262871  | 4.518927  | 6.525574  |
| H | -0.688994 | 5.650150  | 3.896236  | H | -4.248594  | 4.662275  | 8.005552  |
| H | -2.036369 | 7.388468  | 5.165612  | H | -5.060295  | 6.104479  | 7.353994  |
| H | -3.124907 | -2.120589 | 14.043692 | C | -9.189428  | 0.416503  | 7.945174  |
| H | -3.656914 | 0.708124  | 5.261112  | C | -9.374080  | 0.609946  | 6.420853  |
| H | 0.098749  | 11.175141 | 11.107879 | H | -9.435243  | 1.681630  | 6.145251  |
| C | 4.305779  | 8.164558  | 12.866178 | H | -10.308665 | 0.119504  | 6.075947  |
| H | 3.080394  | 6.405956  | 12.597102 | H | -8.526688  | 0.166606  | 5.858861  |
| H | 2.170909  | 7.944248  | 12.627556 | C | -10.394293 | 1.038969  | 8.690502  |
| C | 4.487097  | 8.091773  | 14.263475 | H | -10.490223 | 2.124235  | 8.487328  |
| C | 5.568350  | 8.731286  | 14.889095 | H | -10.292421 | 0.910731  | 9.787415  |
| C | 6.472329  | 9.451007  | 14.069950 | H | -11.341092 | 0.552881  | 8.373989  |
| C | 6.324680  | 9.539602  | 12.675870 | C | -9.169618  | -1.094869 | 8.240136  |
| C | 5.220514  | 8.880727  | 12.085646 | H | -8.342113  | -1.609634 | 7.711040  |
| H | 5.062710  | 8.909857  | 10.998413 | H | -10.119563 | -1.557140 | 7.902270  |
| H | 7.322572  | 9.954472  | 14.549539 | H | -9.064187  | -1.302406 | 9.324192  |
| H | 3.761845  | 7.518123  | 14.859325 |   |            |           |           |
| C | 5.802597  | 8.671476  | 16.413151 |   |            |           |           |
| C | 7.312027  | 10.315370 | 11.778483 |   |            |           |           |
| C | 4.725252  | 7.842448  | 17.137417 |   |            |           |           |
| H | 3.710874  | 8.268673  | 16.997957 |   |            |           |           |
| H | 4.931279  | 7.828704  | 18.226883 |   |            |           |           |
| H | 4.708787  | 6.789294  | 16.790267 |   |            |           |           |
| C | 7.180618  | 8.025491  | 16.693953 |   |            |           |           |
| H | 7.368717  | 7.972260  | 17.786577 |   |            |           |           |
| H | 8.009446  | 8.604248  | 16.239694 |   |            |           |           |
| H | 7.226761  | 6.994791  | 16.287252 |   |            |           |           |
| C | 5.779329  | 10.106719 | 16.991788 |   |            |           |           |
| H | 4.798271  | 10.592538 | 16.813662 |   |            |           |           |
| H | 6.560113  | 10.748875 | 16.537584 |   |            |           |           |
| H | 5.957785  | 10.085626 | 18.087128 |   |            |           |           |
| C | 8.448577  | 10.969623 | 12.585690 |   |            |           |           |
| H | 8.065537  | 11.703578 | 13.323559 |   |            |           |           |
| H | 9.130429  | 11.513314 | 11.900599 |   |            |           |           |
| H | 9.055782  | 10.218311 | 13.130147 |   |            |           |           |
| C | 6.548404  | 11.430037 | 11.023847 |   |            |           |           |

## S2 NMR Spectroscopic Studies of CISSS

Dichloromethane-d<sub>2</sub> was dried over CaH<sub>2</sub> and pyridine-d<sub>5</sub> over 4 Å molecular sieves and were each distilled prior to use. Samples were prepared in an M. Braun Labmaster 130 Glovebox under Ar. In the so-called Evans NMR susceptibility measurements, a regular NMR tube contained the complex at a constant concentration (2.92 mmol·L<sup>-1</sup>) in dichloromethane-d<sub>2</sub> with 1 % tetramethylsilane and a varying concentration of pyridine. An inserted coaxial tube of smaller diameter containing everything but the complex served as the reference. Due to the difference in the volume susceptibility of the solutions, two resonance lines are obtained for TMS, with the signal for the more paramagnetic solution lying at higher frequencies.<sup>8</sup> The difference of the resonance frequencies  $\Delta f$  between the TMS signals of the sample and the reference was determined at different temperatures (250, 260, 270, 280, 290, 300 K).

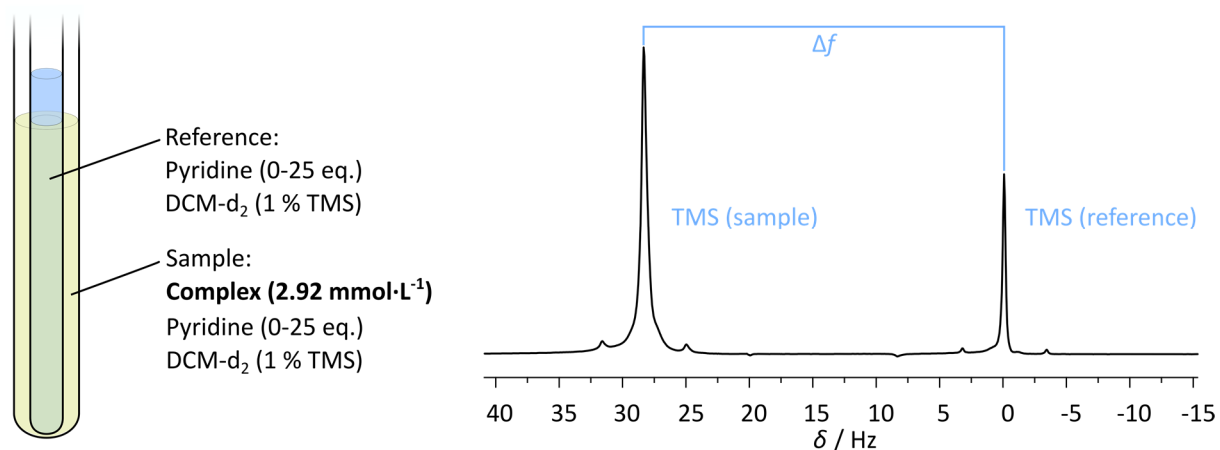

**Figure S8.** Experimental setup for an Evans NMR susceptibility measurement (left). The inner tube contains the reference with pyridine, TMS, and DCM. The outer tube additionally contains the complex **1d**. This results in two TMS signals in the <sup>1</sup>H NMR spectrum whose difference is determined (right).

From these values the mass magnetic susceptibility  $\chi_{\text{para}}^g / \text{cm}^3 \cdot \text{g}^{-1}$  of the complex was calculated.

$$\chi_{\text{para}}^g = \frac{3 \cdot \Delta f}{4\pi \cdot f \cdot \rho_{\text{Ni}}} - \chi_{\text{dia}}^g \quad (\text{S3})$$

where  $3/4\pi$  is the demagnetization factor for a cylindrical sample parallel to the high field of a cryomagnet<sup>9</sup>,  $\Delta f$  is difference in the resonance frequencies in Hz,  $f$  is the spectrometer frequency ( $4 \cdot 10^8$  Hz),  $\rho_{\text{Ni}}$  is the mass concentration of the complex ( $1.6 \cdot 10^{-3} \text{ g} \cdot \text{cm}^{-3}$ ), and  $\chi_{\text{dia}}^g$  is the diamagnetic correction for the complex susceptibility which has been calculated from Pascal's constants<sup>10</sup> ( $-6.02 \cdot 10^{-7} \text{ cm}^3 \cdot \text{g}^{-1}$ ). The latter term is not found in the original paper as only completely paramagnetic samples were examined where the paramagnetic susceptibility exceeds the diamagnetic susceptibility in magnitude, thus the latter only has a negligible impact on the measured total susceptibility.<sup>8</sup> Where only partially paramagnetic samples are investigated, it is necessary to take the diamagnetic susceptibility into account.

In the original paper, the equation included two terms for a solvent correction. Grant proved that the mutual omission of these interrelated terms is appropriate for dilute solutions as these terms usually cancel themselves out, thus the error being very small for dilute solutions. The results were more inaccurate if only one term was neglected as had been suggested earlier.<sup>11</sup>

## S2.1 Magnetic measurements

The molar magnetic susceptibility  $\chi^m / \text{cm}^3 \cdot \text{mol}^{-1}$  is calculated from the mass magnetic susceptibility  $\chi_{\text{para}}^g / \text{cm}^3 \cdot \text{g}^{-1}$  by multiplication with the molar mass  $M$ .

$$\chi^m = \chi_{\text{para}}^g \cdot M \quad (\text{S4})$$

In pure pyridine- $d_5$ , complex **1d** is expected to exist as its octahedral bispyridine adduct **1d**(py- $d_5$ )<sub>2</sub>. Therefore,  $\chi_{\text{para}}^g$  was calculated using  $\rho_{\text{Ni}} = 2.09 \cdot 10^{-3} \text{ g}^3 \cdot \text{cm}^{-1}$ ,  $\chi_{\text{dia}}^g = -6.00 \cdot 10^{-7} \text{ cm}^3 \cdot \text{g}^{-1}$  and  $\chi^m$  with  $M = 715.53 \text{ g} \cdot \text{mol}^{-1}$ . The effective magnetic moment was calculated from  $\chi^m$  and varies with temperature (Table S7), thus indicating a deviation from Curie behavior.

$$\mu_{\text{eff}} = 2.828 \sqrt{\chi^m \cdot T} \Leftrightarrow \chi^m = \frac{\mu_{\text{eff}}^2}{2.828^2} \cdot \frac{1}{T} \quad (\text{S5})$$

**Table S7.** Results of the Evans NMR measurements of complex **1d** ( $2.92 \text{ mmol} \cdot \text{L}^{-1}$ ) in pyridine- $d_5$  at different temperatures and conversion into the mass and molar susceptibilities as well as the effective magnetic moment.

| $T / \text{K}$ | $T^{-1} / \text{K}^{-1}$ | $\Delta f / \text{Hz}$ | $\chi_{\text{para}}^g / 10^{-6} \text{ cm}^3 \cdot \text{g}^{-1}$ | $\chi^m / 10^{-3} \text{ cm}^3 \cdot \text{mol}^{-1}$ | $\mu_{\text{eff}} / \mu_{\text{B}}$ |
|----------------|--------------------------|------------------------|-------------------------------------------------------------------|-------------------------------------------------------|-------------------------------------|
| 300            | $3.33 \cdot 10^{-3}$     | 17.68                  | 5.64                                                              | 4.04                                                  | 3.11                                |
| 290            | $3.45 \cdot 10^{-3}$     | 18.51                  | 5.88                                                              | 4.21                                                  | 3.12                                |
| 280            | $3.57 \cdot 10^{-3}$     | 19.25                  | 6.09                                                              | 4.36                                                  | 3.12                                |
| 270            | $3.70 \cdot 10^{-3}$     | 20.35                  | 6.40                                                              | 4.58                                                  | 3.15                                |
| 260            | $3.85 \cdot 10^{-3}$     | 21.43                  | 6.71                                                              | 4.80                                                  | 3.16                                |
| 250            | $4.00 \cdot 10^{-3}$     | 22.54                  | 7.03                                                              | 5.03                                                  | 3.17                                |

The linear dependence of the molar susceptibility from the reciprocal temperature in accordance to eq. (S5) was plotted (Figure S9).

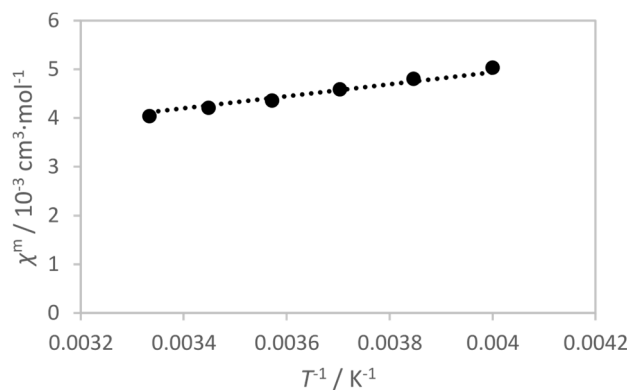

**Figure S9.** Plot of the molar magnetic susceptibility of complex **1d** ( $2.92 \text{ mmol} \cdot \text{L}^{-1}$ ) in pyridine- $d_5$  as a function of the reciprocal temperature.

The formula for the fitted straight line is:

$$\chi^m = 1234.4 \cdot \frac{1}{T} \quad (\text{S6})$$

The effective magnetic moment  $\mu_{\text{eff}}$  was calculated from the slope to be  $3.14 \mu_{\text{B}}$ .



## S2.2 Titration Curves

A quantity of approximately 0.8 mg of complex **1d** was weighed precisely. The respective equivalents of pyridine-d<sub>5</sub> were added and as much DCM-d<sub>2</sub> (1 % TMS) so that always the same complex concentration of 2.92 mmol·L<sup>-1</sup> was obtained (a total volume of approximately 0.5 mL). The insert was provided with a solution of same equivalents of pyridine-d<sub>5</sub> in DCM-d<sub>2</sub> (1 % TMS).

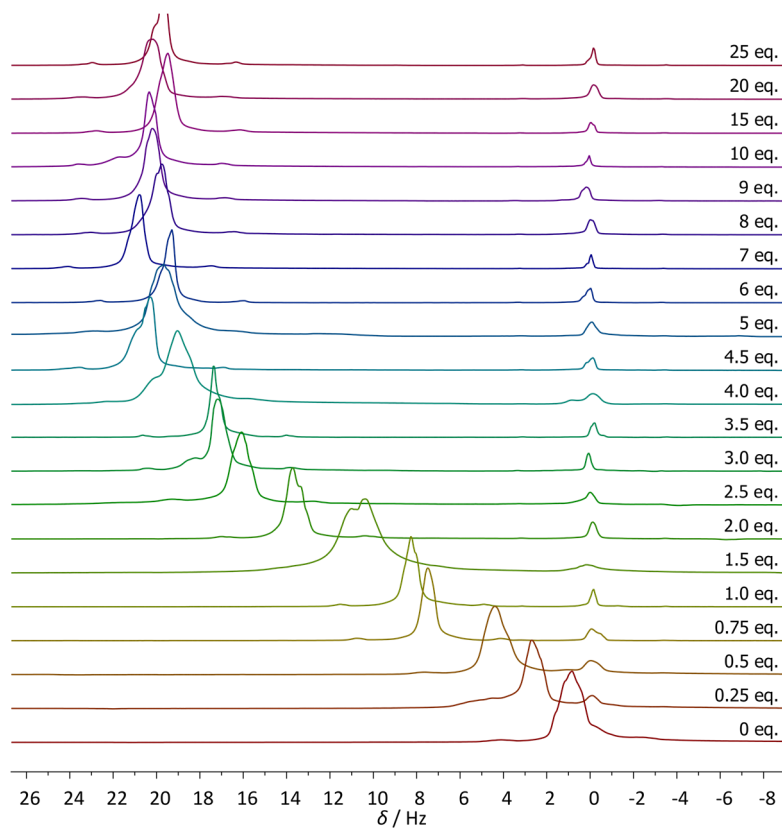

**Figure S10.** <sup>1</sup>H NMR spectra for complex **1d** in DCM-d<sub>2</sub> with different equivalents of pyridine at 300 K.

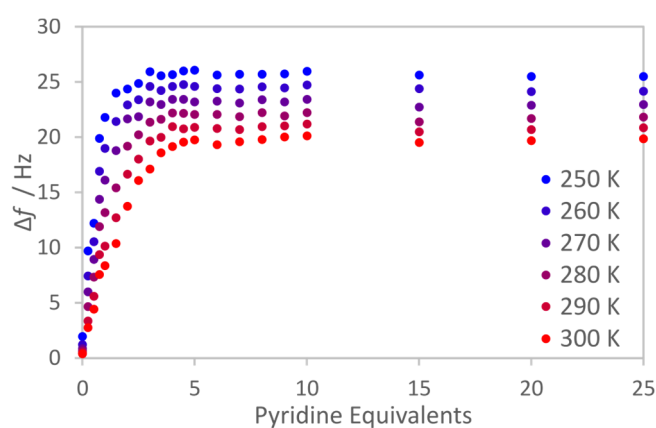

**Figure S11.** Titration curves for complex **1d** in DCM-d<sub>2</sub> with pyridine at different temperatures.

**Table S8.** Measured differences of resonance frequencies  $\Delta f$  and mole fraction  $x_{\text{para}}$  of paramagnetic species for the titration of complex **1d** in DCM-d<sub>2</sub> with pyridine.

| eq. Py | $\Delta f$ / Hz |       |       |       |       |       | $x_{\text{para}}$ |       |       |       |       |       |
|--------|-----------------|-------|-------|-------|-------|-------|-------------------|-------|-------|-------|-------|-------|
|        | 300 K           | 290 K | 280 K | 270 K | 260 K | 250 K | 300 K             | 290 K | 280 K | 270 K | 260 K | 250 K |
| 0      | 0.37            | 0.50  | 0.66  | 0.86  | 1.23  | 1.94  | 0.09              | 0.09  | 0.10  | 0.10  | 0.11  | 0.13  |
| 0.25   | 2.77            | 3.35  | 4.65  | 5.98  | 7.43  | 9.70  | 0.20              | 0.22  | 0.26  | 0.30  | 0.34  | 0.41  |
| 0.5    | 4.42            | 5.61  | 7.34  | 8.94  | 10.53 | 12.20 | 0.28              | 0.32  | 0.38  | 0.42  | 0.46  | 0.50  |
| 0.75   | 7.55            | 9.37  | 11.89 | 14.37 | 16.92 | 19.88 | 0.42              | 0.48  | 0.57  | 0.64  | 0.70  | 0.78  |
| 1      | 8.38            | 10.14 | 13.18 | 16.10 | 19.00 | 21.80 | 0.46              | 0.52  | 0.62  | 0.71  | 0.78  | 0.85  |
| 1.5    | 10.36           | 12.71 | 15.40 | 18.79 | 21.42 | 24.00 | 0.55              | 0.63  | 0.71  | 0.81  | 0.87  | 0.93  |
| 2      | 13.75           | 16.66 | 19.17 | 21.66 | 22.93 | 24.37 | 0.71              | 0.80  | 0.87  | 0.93  | 0.93  | 0.94  |
| 2.5    | 16.07           | 18.01 | 20.22 | 21.84 | 23.40 | 24.87 | 0.81              | 0.86  | 0.92  | 0.94  | 0.95  | 0.96  |
| 3      | 17.10           | 19.64 | 21.37 | 23.18 | 24.58 | 25.94 | 0.86              | 0.93  | 0.96  | 0.99  | 0.99  | 1.00  |
| 3.5    | 18.58           | 19.99 | 21.63 | 22.97 | 24.24 | 25.56 | 0.93              | 0.95  | 0.97  | 0.98  | 0.98  | 0.99  |
| 4      | 19.16           | 20.95 | 22.19 | 23.41 | 24.61 | 25.65 | 0.96              | 0.99  | 1.00  | 1.00  | 1.00  | 0.99  |
| 4.5    | 19.56           | 20.76 | 22.17 | 23.41 | 24.76 | 26.00 | 0.97              | 0.98  | 1.00  | 1.00  | 1.00  | 1.00  |
| 5      | 19.75           | 20.89 | 22.06 | 23.18 | 24.61 | 26.05 | 0.98              | 0.99  | 0.99  | 0.99  | 1.00  | 1.00  |
| 6      | 19.31           | 20.78 | 22.07 | 23.25 | 24.38 | 25.64 | 0.96              | 0.98  | 0.99  | 0.99  | 0.99  | 0.99  |
| 7      | 19.57           | 20.69 | 21.84 | 23.09 | 24.37 | 25.71 | 0.98              | 0.98  | 0.98  | 0.99  | 0.99  | 0.99  |
| 8      | 19.77           | 20.97 | 22.22 | 23.40 | 24.56 | 25.68 | 0.98              | 0.99  | 1.00  | 1.00  | 0.99  | 0.99  |
| 9      | 20.01           | 21.02 | 21.93 | 23.19 | 24.46 | 25.74 | 1.00              | 0.99  | 0.99  | 0.99  | 0.99  | 0.99  |
| 10     | 20.11           | 21.18 | 22.24 | 23.44 | 24.73 | 25.97 | 1.00              | 1.00  | 1.00  | 1.00  | 1.00  | 1.00  |
| 15     | 19.52           | 20.48 | 21.40 | 22.74 | 24.38 | 25.64 | 0.97              | 0.97  | 0.96  | 0.97  | 0.99  | 0.99  |
| 20     | 19.70           | 20.69 | 21.68 | 22.89 | 24.13 | 25.51 | 0.98              | 0.98  | 0.98  | 0.98  | 0.98  | 0.98  |
| 25     | 19.85           | 20.84 | 21.83 | 22.95 | 24.17 | 25.50 | 0.99              | 0.99  | 0.98  | 0.98  | 0.98  | 0.98  |

### S2.3 Dilution Experiments

A solution of the complex already exhibited modest paramagnetism. It was presumed that a dimerization in analogy to a solid state structure (see chapter S3.3) is the reason. This assumption was supported by DFT calculations (see chapter S1.8). A dilution series of the complex **1d** in DCM-d<sub>2</sub> was conducted to investigate the equilibrium. The shift difference increased with rising complex concentration and lowering the temperature. At some measurements at 300 K, sample and reference signals could not be distinguished anymore.

**Table S9.** Measured differences of resonance frequencies  $\Delta f$  and mass susceptibilities for a dilution series of complex **1d** in DCM-d<sub>2</sub>.

| $c / \text{mmol}\cdot\text{L}^{-1}$ | $\Delta f / \text{Hz}$ |       |       |       |       |       | $\chi_{\text{para}}^{\text{g}} / 10^{-6} \text{cm}^3\cdot\text{g}^{-1}$ |       |       |       |       |       |
|-------------------------------------|------------------------|-------|-------|-------|-------|-------|-------------------------------------------------------------------------|-------|-------|-------|-------|-------|
|                                     | 300 K                  | 290 K | 280 K | 270 K | 260 K | 250 K | 300 K                                                                   | 290 K | 280 K | 270 K | 260 K | 250 K |
| 1.46                                | -                      | 0.25  | 0.37  | 0.51  | 0.63  | 0.93  | -                                                                       | 0.79  | 0.88  | 0.98  | 1.07  | 1.30  |
| 2.19                                | -                      | 0.30  | 0.47  | 0.75  | 0.92  | 2.02  | -                                                                       | 0.75  | 0.84  | 0.97  | 1.06  | 1.61  |
| 2.92                                | -                      | 0.49  | 0.73  | 1.06  | 1.42  | 4.50  | -                                                                       | 0.78  | 0.87  | 1.00  | 1.13  | 2.28  |
| 3.65                                | 0.49                   | 0.62  | 0.8   | 1.17  | 1.70  | 5.66  | 0.75                                                                    | 0.79  | 0.84  | 0.95  | 1.11  | 2.29  |
| 4.39                                | 0.49                   | 0.62  | 0.79  | 1.17  | 1.80  | 6.69  | 0.72                                                                    | 0.76  | 0.80  | 0.89  | 1.05  | 2.26  |
| 5.12                                | -                      | 0.93  | 1.20  | 1.57  | 3.08  | 9.43  | -                                                                       | 0.80  | 0.86  | 0.94  | 1.26  | 2.61  |
| 5.85                                | 0.90                   | 1.07  | 1.16  | 1.91  | 4.36  | 11.06 | 0.77                                                                    | 0.80  | 0.82  | 0.96  | 1.41  | 2.66  |

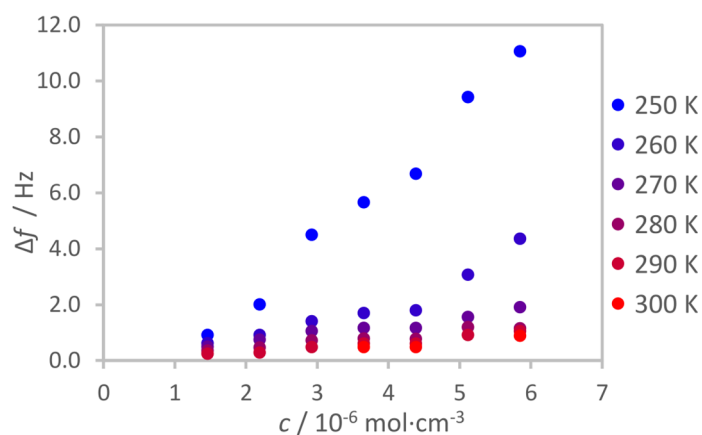

**Figure S12.** Shift difference as a function of the mass concentration of complex **1d** in DCM-d<sub>2</sub>.

## S2.4 Evaluation of Equilibria

The Equilibria Speciation Tool (EST) is an Excel utility intended for the calculation of chemical equilibria.<sup>13</sup> It was used to determine the concentration for the occurring species from the titration curves at each titration step (Ni, Ni(py), Ni(py)<sub>2</sub> or Ni<sub>2</sub>, Ni<sub>2</sub>(py), Ni(py)<sub>2</sub>) and thereof the association constants ( $K_{1s}$ ,  $K_2$ ). The equilibria were defined by the stoichiometric coefficients of the contribution species. Furthermore, the initial concentrations of the complex and pyridine ( $[Ni]_0 = 2.92 \text{ mmol}\cdot\text{L}^{-1}$  or  $[Ni_2]_0 = 1.46 \text{ mmol}\cdot\text{L}^{-1}$ ,  $[Py]_0$  here given as equivalents) as well as the measured values ( $\chi_{\text{para,exp}}^{\text{e}}$ ) were specified. Considering the contribution of each species to the susceptibility, the program applies nonlinear fitting based on the Newton-Raphson method to calculate susceptibility values ( $\chi_{\text{para,calc}}^{\text{e}}$ ) by varying the concentrations of the different species, minimizing the mean square error between measured and calculated values.

Note that equilibrium constants are dimensionless values as they are defined by activities, which are dimensionless as well. To use concentrations instead of activities, the values are formally divided by the standard concentration of  $1 \text{ mol}\cdot\text{L}^{-1}$ .<sup>14</sup>

The change in enthalpy and entropy for the reactions were determined from the temperature-dependent association constants using the van't Hoff equation which is derived from two definitions of the change in the Gibbs free energy.

$$\Delta G = \Delta H - T \cdot \Delta S = -RT \ln K \quad \Leftrightarrow \quad \ln K = -\frac{\Delta H}{R} \cdot \frac{1}{T} + \frac{\Delta S}{R} \quad (\text{S7})$$

### S2.4.1 Solvent Coordination Model

Here it is assumed that the intrinsic paramagnetism of the solution is induced by solvent coordination to the square-planar complex Ni. Data evaluation is thus based on the formula

$$\chi_{\text{para}}^{\text{e}} = \frac{[Ni] \cdot \chi_{\text{para},0}^{\text{e}} + ([Ni(\text{py})] + [Ni(\text{py})_2]) \cdot \chi_{\text{para,max}}^{\text{e}}}{[Ni]_0} \quad (\text{S8})$$

where  $\chi_{\text{para},0}^{\text{e}}$  is the susceptibility in the absence of pyridine and  $\chi_{\text{para,max}}^{\text{e}}$  the highest measured susceptibility.

**Table S10.** Results for Evans NMR titration experiments of complex **1d** in DCM-d<sub>2</sub> (2.92 mmol·L<sup>-1</sup>) with pyridine at 300 K and comparison with the values obtained by nonlinear fitting with EST for the solvent coordination model. The mean square error is 0.026·10<sup>-6</sup> cm<sup>3</sup>·g<sup>-1</sup>. The concentrations of all species at every titration step are given.

| eq. Py | $\Delta f$ / Hz | $\chi^2_{\text{para,exp}} / 10^{-6} \text{ cm}^3 \cdot \text{g}^{-1}$ | $\chi^2_{\text{para,calc}} / 10^{-6} \text{ cm}^3 \cdot \text{g}^{-1}$ | [Ni] / mol·L <sup>-1</sup> | [Ni(py)] / mol·L <sup>-1</sup> | [Ni(py) <sub>2</sub> ] / mol·L <sup>-1</sup> |
|--------|-----------------|-----------------------------------------------------------------------|------------------------------------------------------------------------|----------------------------|--------------------------------|----------------------------------------------|
| 0      | 0.37            | 0.740                                                                 | 0.740                                                                  | 2.92·10 <sup>-3</sup>      | 0                              | 0                                            |
| 0.25   | 2.77            | 1.634                                                                 | 1.541                                                                  | 2.61·10 <sup>-3</sup>      | 2.39·10 <sup>-4</sup>          | 7.95·10 <sup>-5</sup>                        |
| 0.5    | 4.42            | 2.250                                                                 | 2.300                                                                  | 2.30·10 <sup>-3</sup>      | 3.86·10 <sup>-4</sup>          | 2.34·10 <sup>-4</sup>                        |
| 0.75   | 7.55            | 3.417                                                                 | 3.015                                                                  | 2.02·10 <sup>-3</sup>      | 4.83·10 <sup>-4</sup>          | 4.20·10 <sup>-4</sup>                        |
| 1      | 8.38            | 3.726                                                                 | 3.683                                                                  | 1.75·10 <sup>-3</sup>      | 5.48·10 <sup>-4</sup>          | 6.21·10 <sup>-4</sup>                        |
| 1.5    | 10.36           | 4.465                                                                 | 4.868                                                                  | 1.28·10 <sup>-3</sup>      | 6.05·10 <sup>-4</sup>          | 1.03·10 <sup>-3</sup>                        |
| 2      | 13.75           | 5.729                                                                 | 5.831                                                                  | 9.01·10 <sup>-4</sup>      | 5.95·10 <sup>-4</sup>          | 1.43·10 <sup>-3</sup>                        |
| 2.5    | 16.07           | 6.594                                                                 | 6.557                                                                  | 6.13·10 <sup>-4</sup>      | 5.46·10 <sup>-4</sup>          | 1.76·10 <sup>-3</sup>                        |
| 3      | 17.10           | 6.978                                                                 | 7.062                                                                  | 4.12·10 <sup>-4</sup>      | 4.80·10 <sup>-4</sup>          | 2.03·10 <sup>-3</sup>                        |
| 3.5    | 18.58           | 7.528                                                                 | 7.393                                                                  | 2.81·10 <sup>-4</sup>      | 4.15·10 <sup>-4</sup>          | 2.23·10 <sup>-3</sup>                        |
| 4      | 19.16           | 7.746                                                                 | 7.604                                                                  | 1.97·10 <sup>-4</sup>      | 3.59·10 <sup>-4</sup>          | 2.37·10 <sup>-3</sup>                        |
| 4.5    | 19.56           | 7.894                                                                 | 7.740                                                                  | 1.43·10 <sup>-4</sup>      | 3.12·10 <sup>-4</sup>          | 2.47·10 <sup>-3</sup>                        |
| 5      | 19.75           | 7.966                                                                 | 7.830                                                                  | 1.08·10 <sup>-4</sup>      | 2.75·10 <sup>-4</sup>          | 2.54·10 <sup>-3</sup>                        |
| 6      | 19.31           | 7.802                                                                 | 7.934                                                                  | 6.60·10 <sup>-5</sup>      | 2.19·10 <sup>-4</sup>          | 2.64·10 <sup>-3</sup>                        |
| 7      | 19.57           | 7.899                                                                 | 7.989                                                                  | 4.42·10 <sup>-5</sup>      | 1.81·10 <sup>-4</sup>          | 2.70·10 <sup>-3</sup>                        |
| 8      | 19.77           | 7.974                                                                 | 8.021                                                                  | 3.15·10 <sup>-5</sup>      | 1.54·10 <sup>-4</sup>          | 2.74·10 <sup>-3</sup>                        |
| 9      | 20.01           | 8.063                                                                 | 8.041                                                                  | 2.36·10 <sup>-5</sup>      | 1.34·10 <sup>-4</sup>          | 2.77·10 <sup>-3</sup>                        |
| 10     | 20.11           | 8.101                                                                 | 8.055                                                                  | 1.83·10 <sup>-5</sup>      | 1.18·10 <sup>-4</sup>          | 2.79·10 <sup>-3</sup>                        |
| 15     | 19.52           | 7.881                                                                 | 8.083                                                                  | 7.11·10 <sup>-6</sup>      | 7.46·10 <sup>-5</sup>          | 2.84·10 <sup>-3</sup>                        |
| 20     | 19.70           | 7.946                                                                 | 8.091                                                                  | 3.75·10 <sup>-6</sup>      | 5.44·10 <sup>-5</sup>          | 2.87·10 <sup>-3</sup>                        |
| 25     | 19.85           | 8.004                                                                 | 8.095                                                                  | 2.31·10 <sup>-6</sup>      | 4.28·10 <sup>-5</sup>          | 2.88·10 <sup>-3</sup>                        |

**Table S11.** Results for Evans NMR titration experiments of complex **1d** in DCM-d<sub>2</sub> (2.92 mmol·L<sup>-1</sup>) with pyridine at 290 K and comparison with the values obtained by nonlinear fitting with EST for the solvent coordination model. The mean square error is 0.028·10<sup>-6</sup> cm<sup>3</sup>·g<sup>-1</sup>. The concentrations of all species at every titration step are given.

| eq. Py | $\Delta f$ / Hz | $\chi^2_{\text{para,exp}} / 10^{-6} \text{ cm}^3 \cdot \text{g}^{-1}$ | $\chi^2_{\text{para,calc}} / 10^{-6} \text{ cm}^3 \cdot \text{g}^{-1}$ | [Ni] / mol·L <sup>-1</sup> | [Ni(py)] / mol·L <sup>-1</sup> | [Ni(py) <sub>2</sub> ] / mol·L <sup>-1</sup> |
|--------|-----------------|-----------------------------------------------------------------------|------------------------------------------------------------------------|----------------------------|--------------------------------|----------------------------------------------|
| 0      | 0.50            | 0.788                                                                 | 0.788                                                                  | 2.92·10 <sup>-3</sup>      | 0                              | 0                                            |
| 0.25   | 3.35            | 1.851                                                                 | 1.854                                                                  | 2.52·10 <sup>-3</sup>      | 3.24·10 <sup>-4</sup>          | 8.04·10 <sup>-5</sup>                        |
| 0.5    | 5.61            | 2.694                                                                 | 2.794                                                                  | 2.16·10 <sup>-3</sup>      | 5.20·10 <sup>-4</sup>          | 2.41·10 <sup>-4</sup>                        |
| 0.75   | 9.37            | 4.096                                                                 | 3.645                                                                  | 1.84·10 <sup>-3</sup>      | 6.46·10 <sup>-4</sup>          | 4.37·10 <sup>-4</sup>                        |
| 1      | 10.14           | 4.383                                                                 | 4.417                                                                  | 1.55·10 <sup>-3</sup>      | 7.23·10 <sup>-4</sup>          | 6.53·10 <sup>-4</sup>                        |
| 1.5    | 12.71           | 5.341                                                                 | 5.731                                                                  | 1.05·10 <sup>-3</sup>      | 7.73·10 <sup>-4</sup>          | 1.10·10 <sup>-3</sup>                        |
| 2      | 16.66           | 6.814                                                                 | 6.725                                                                  | 6.73·10 <sup>-4</sup>      | 7.28·10 <sup>-4</sup>          | 1.52·10 <sup>-3</sup>                        |
| 2.5    | 18.01           | 7.317                                                                 | 7.404                                                                  | 4.15·10 <sup>-4</sup>      | 6.35·10 <sup>-4</sup>          | 1.87·10 <sup>-3</sup>                        |
| 3      | 19.64           | 7.925                                                                 | 7.822                                                                  | 2.57·10 <sup>-4</sup>      | 5.33·10 <sup>-4</sup>          | 2.13·10 <sup>-3</sup>                        |
| 3.5    | 19.99           | 8.056                                                                 | 8.064                                                                  | 1.65·10 <sup>-4</sup>      | 4.45·10 <sup>-4</sup>          | 2.31·10 <sup>-3</sup>                        |
| 4      | 20.95           | 8.414                                                                 | 8.206                                                                  | 1.11·10 <sup>-4</sup>      | 3.75·10 <sup>-4</sup>          | 2.44·10 <sup>-3</sup>                        |
| 4.5    | 20.76           | 8.341                                                                 | 8.291                                                                  | 7.91·10 <sup>-5</sup>      | 3.21·10 <sup>-4</sup>          | 2.52·10 <sup>-3</sup>                        |
| 5      | 20.89           | 8.391                                                                 | 8.346                                                                  | 5.85·10 <sup>-5</sup>      | 2.80·10 <sup>-4</sup>          | 2.59·10 <sup>-3</sup>                        |
| 6      | 20.78           | 8.350                                                                 | 8.407                                                                  | 3.53·10 <sup>-5</sup>      | 2.21·10 <sup>-4</sup>          | 2.67·10 <sup>-3</sup>                        |
| 7      | 20.69           | 8.315                                                                 | 8.438                                                                  | 2.34·10 <sup>-5</sup>      | 1.82·10 <sup>-4</sup>          | 2.72·10 <sup>-3</sup>                        |
| 8      | 20.97           | 8.421                                                                 | 8.456                                                                  | 1.66·10 <sup>-5</sup>      | 1.54·10 <sup>-4</sup>          | 2.75·10 <sup>-3</sup>                        |
| 9      | 21.02           | 8.440                                                                 | 8.467                                                                  | 1.24·10 <sup>-5</sup>      | 1.34·10 <sup>-4</sup>          | 2.78·10 <sup>-3</sup>                        |
| 10     | 21.18           | 8.500                                                                 | 8.475                                                                  | 9.60·10 <sup>-6</sup>      | 1.18·10 <sup>-4</sup>          | 2.80·10 <sup>-3</sup>                        |
| 15     | 20.48           | 8.239                                                                 | 8.490                                                                  | 3.73·10 <sup>-6</sup>      | 7.41·10 <sup>-5</sup>          | 2.85·10 <sup>-3</sup>                        |
| 20     | 20.69           | 8.315                                                                 | 8.495                                                                  | 1.96·10 <sup>-6</sup>      | 5.40·10 <sup>-5</sup>          | 2.87·10 <sup>-3</sup>                        |
| 25     | 20.84           | 8.373                                                                 | 8.497                                                                  | 1.21·10 <sup>-6</sup>      | 4.25·10 <sup>-5</sup>          | 2.88·10 <sup>-3</sup>                        |

**Table S12.** Results for Evans NMR titration experiments of complex **1d** in DCM-d<sub>2</sub> (2.92 mmol·L<sup>-1</sup>) with pyridine at 280 K and comparison with the values obtained by nonlinear fitting with EST for the solvent coordination model. The mean square error is 0.034·10<sup>-6</sup> cm<sup>3</sup>·g<sup>-1</sup>. The concentrations of all species at every titration step are given.

| eq. Py | $\Delta f$ / Hz | $\chi^2_{\text{para,exp}} / 10^{-6} \text{ cm}^3 \cdot \text{g}^{-1}$ | $\chi^2_{\text{para,calc}} / 10^{-6} \text{ cm}^3 \cdot \text{g}^{-1}$ | [Ni] / mol·L <sup>-1</sup> | [Ni(py)] / mol·L <sup>-1</sup> | [Ni(py) <sub>2</sub> ] / mol·L <sup>-1</sup> |
|--------|-----------------|-----------------------------------------------------------------------|------------------------------------------------------------------------|----------------------------|--------------------------------|----------------------------------------------|
| 0      | 0.50            | 0.848                                                                 | 0.848                                                                  | 2.92·10 <sup>-3</sup>      | 0                              | 0                                            |
| 0.25   | 3.35            | 2.340                                                                 | 2.299                                                                  | 2.40·10 <sup>-3</sup>      | 4.81·10 <sup>-4</sup>          | 4.65·10 <sup>-5</sup>                        |
| 0.5    | 5.61            | 3.340                                                                 | 3.527                                                                  | 1.95·10 <sup>-3</sup>      | 8.11·10 <sup>-4</sup>          | 1.63·10 <sup>-4</sup>                        |
| 0.75   | 9.37            | 5.040                                                                 | 4.574                                                                  | 1.57·10 <sup>-3</sup>      | 1.03·10 <sup>-3</sup>          | 3.25·10 <sup>-4</sup>                        |
| 1      | 10.14           | 5.520                                                                 | 5.462                                                                  | 1.25·10 <sup>-3</sup>      | 1.16·10 <sup>-3</sup>          | 5.19·10 <sup>-4</sup>                        |
| 1.5    | 12.71           | 6.340                                                                 | 6.817                                                                  | 7.54·10 <sup>-4</sup>      | 1.22·10 <sup>-3</sup>          | 9.51·10 <sup>-4</sup>                        |
| 2      | 16.66           | 7.750                                                                 | 7.685                                                                  | 4.38·10 <sup>-4</sup>      | 1.12·10 <sup>-3</sup>          | 1.37·10 <sup>-3</sup>                        |
| 2.5    | 18.01           | 8.140                                                                 | 8.189                                                                  | 2.55·10 <sup>-4</sup>      | 9.52·10 <sup>-4</sup>          | 1.72·10 <sup>-3</sup>                        |
| 3      | 19.64           | 8.570                                                                 | 8.465                                                                  | 1.54·10 <sup>-4</sup>      | 7.95·10 <sup>-4</sup>          | 1.97·10 <sup>-3</sup>                        |
| 3.5    | 19.99           | 8.670                                                                 | 8.617                                                                  | 9.93·10 <sup>-5</sup>      | 6.66·10 <sup>-4</sup>          | 2.16·10 <sup>-3</sup>                        |
| 4      | 20.95           | 8.880                                                                 | 8.704                                                                  | 6.77·10 <sup>-5</sup>      | 5.67·10 <sup>-4</sup>          | 2.29·10 <sup>-3</sup>                        |
| 4.5    | 20.76           | 8.870                                                                 | 8.757                                                                  | 4.85·10 <sup>-5</sup>      | 4.90·10 <sup>-4</sup>          | 2.39·10 <sup>-3</sup>                        |
| 5      | 20.89           | 8.830                                                                 | 8.790                                                                  | 3.62·10 <sup>-5</sup>      | 4.30·10 <sup>-4</sup>          | 2.46·10 <sup>-3</sup>                        |
| 6      | 20.78           | 8.830                                                                 | 8.829                                                                  | 2.22·10 <sup>-5</sup>      | 3.43·10 <sup>-4</sup>          | 2.56·10 <sup>-3</sup>                        |
| 7      | 20.69           | 8.750                                                                 | 8.849                                                                  | 1.49·10 <sup>-5</sup>      | 2.85·10 <sup>-4</sup>          | 2.62·10 <sup>-3</sup>                        |
| 8      | 20.97           | 8.890                                                                 | 8.861                                                                  | 1.07·10 <sup>-5</sup>      | 2.43·10 <sup>-4</sup>          | 2.67·10 <sup>-3</sup>                        |
| 9      | 21.02           | 8.780                                                                 | 8.868                                                                  | 8.01·10 <sup>-6</sup>      | 2.12·10 <sup>-4</sup>          | 2.70·10 <sup>-3</sup>                        |
| 10     | 21.18           | 8.890                                                                 | 8.873                                                                  | 6.22·10 <sup>-6</sup>      | 1.88·10 <sup>-4</sup>          | 2.73·10 <sup>-3</sup>                        |
| 15     | 20.48           | 8.580                                                                 | 8.883                                                                  | 2.44·10 <sup>-6</sup>      | 1.19·10 <sup>-4</sup>          | 2.80·10 <sup>-3</sup>                        |
| 20     | 20.69           | 8.690                                                                 | 8.886                                                                  | 1.29·10 <sup>-6</sup>      | 8.72·10 <sup>-5</sup>          | 2.84·10 <sup>-3</sup>                        |
| 25     | 20.84           | 8.740                                                                 | 8.888                                                                  | 7.99·10 <sup>-7</sup>      | 6.88·10 <sup>-5</sup>          | 2.85·10 <sup>-3</sup>                        |

**Table S13.** Results for Evans NMR titration experiments of complex **1d** in DCM-d<sub>2</sub> (2.92 mmol·L<sup>-1</sup>) with pyridine at 270 K and comparison with the values obtained by nonlinear fitting with EST for the solvent coordination model. The mean square error is 0.029·10<sup>-6</sup> cm<sup>3</sup>·g<sup>-1</sup>. The concentrations of all species at every titration step are given.

| eq. Py | $\Delta f$ / Hz | $\chi^2_{\text{para,exp}} / 10^{-6} \text{ cm}^3 \cdot \text{g}^{-1}$ | $\chi^2_{\text{para,calc}} / 10^{-6} \text{ cm}^3 \cdot \text{g}^{-1}$ | [Ni] / mol·L <sup>-1</sup> | [Ni(py)] / mol·L <sup>-1</sup> | [Ni(py) <sub>2</sub> ] / mol·L <sup>-1</sup> |
|--------|-----------------|-----------------------------------------------------------------------|------------------------------------------------------------------------|----------------------------|--------------------------------|----------------------------------------------|
| 0      | 0.50            | 0.922                                                                 | 0.922                                                                  | 2.92·10 <sup>-3</sup>      | 0                              | 0                                            |
| 0.25   | 3.35            | 2.830                                                                 | 2.703                                                                  | 2.31·10 <sup>-3</sup>      | 6.00·10 <sup>-4</sup>          | 1.90E-05                                     |
| 0.5    | 5.61            | 3.940                                                                 | 4.265                                                                  | 1.76·10 <sup>-3</sup>      | 1.08·10 <sup>-3</sup>          | 8.06E-05                                     |
| 0.75   | 9.37            | 5.960                                                                 | 5.568                                                                  | 1.31·10 <sup>-3</sup>      | 1.42·10 <sup>-3</sup>          | 1.89·10 <sup>-4</sup>                        |
| 1      | 10.14           | 6.610                                                                 | 6.595                                                                  | 9.53·10 <sup>-4</sup>      | 1.63·10 <sup>-3</sup>          | 3.39·10 <sup>-4</sup>                        |
| 1.5    | 12.71           | 7.610                                                                 | 7.913                                                                  | 4.95·10 <sup>-4</sup>      | 1.71·10 <sup>-3</sup>          | 7.18·10 <sup>-4</sup>                        |
| 2      | 16.66           | 8.680                                                                 | 8.571                                                                  | 2.67·10 <sup>-4</sup>      | 1.56·10 <sup>-3</sup>          | 1.10·10 <sup>-3</sup>                        |
| 2.5    | 18.01           | 8.750                                                                 | 8.894                                                                  | 1.55·10 <sup>-4</sup>      | 1.35·10 <sup>-3</sup>          | 1.42·10 <sup>-3</sup>                        |
| 3      | 19.64           | 9.250                                                                 | 9.061                                                                  | 9.70·10 <sup>-5</sup>      | 1.15·10 <sup>-3</sup>          | 1.67·10 <sup>-3</sup>                        |
| 3.5    | 19.99           | 9.170                                                                 | 9.153                                                                  | 6.49·10 <sup>-5</sup>      | 9.97·10 <sup>-4</sup>          | 1.86·10 <sup>-3</sup>                        |
| 4      | 20.95           | 9.330                                                                 | 9.208                                                                  | 4.59·10 <sup>-5</sup>      | 8.70·10 <sup>-4</sup>          | 2.01·10 <sup>-3</sup>                        |
| 4.5    | 20.76           | 9.330                                                                 | 9.242                                                                  | 3.39·10 <sup>-5</sup>      | 7.69·10 <sup>-4</sup>          | 2.12·10 <sup>-3</sup>                        |
| 5      | 20.89           | 9.250                                                                 | 9.265                                                                  | 2.59·10 <sup>-5</sup>      | 6.86·10 <sup>-4</sup>          | 2.21·10 <sup>-3</sup>                        |
| 6      | 20.78           | 9.270                                                                 | 9.293                                                                  | 1.64·10 <sup>-5</sup>      | 5.63·10 <sup>-4</sup>          | 2.34·10 <sup>-3</sup>                        |
| 7      | 20.69           | 9.210                                                                 | 9.307                                                                  | 1.13·10 <sup>-5</sup>      | 4.76·10 <sup>-4</sup>          | 2.44·10 <sup>-3</sup>                        |
| 8      | 20.97           | 9.330                                                                 | 9.316                                                                  | 8.22·10 <sup>-6</sup>      | 4.11·10 <sup>-4</sup>          | 2.50·10 <sup>-3</sup>                        |
| 9      | 21.02           | 9.250                                                                 | 9.322                                                                  | 6.23·10 <sup>-6</sup>      | 3.62·10 <sup>-4</sup>          | 2.56·10 <sup>-3</sup>                        |
| 10     | 21.18           | 9.340                                                                 | 9.326                                                                  | 4.89·10 <sup>-6</sup>      | 3.23·10 <sup>-4</sup>          | 2.60·10 <sup>-3</sup>                        |
| 15     | 20.48           | 9.080                                                                 | 9.334                                                                  | 1.97·10 <sup>-6</sup>      | 2.09·10 <sup>-4</sup>          | 2.71·10 <sup>-3</sup>                        |
| 20     | 20.69           | 9.140                                                                 | 9.337                                                                  | 1.05·10 <sup>-6</sup>      | 1.55·10 <sup>-4</sup>          | 2.77·10 <sup>-3</sup>                        |
| 25     | 20.84           | 9.160                                                                 | 9.338                                                                  | 6.54·10 <sup>-7</sup>      | 1.23·10 <sup>-4</sup>          | 2.80·10 <sup>-3</sup>                        |



**Table S14.** Results for Evans NMR titration experiments of complex **1d** in DCM-d<sub>2</sub> (2.92 mmol·L<sup>-1</sup>) with pyridine at 260 K and comparison with the values obtained by nonlinear fitting with EST for the solvent coordination model. The mean square error is 0.034·10<sup>-6</sup> cm<sup>3</sup>·g<sup>-1</sup>. The concentrations of all species at every titration step are given.

| eq. Py | $\Delta f$ / Hz | $\chi^2_{\text{para,exp}} / 10^{-6} \text{ cm}^3 \cdot \text{g}^{-1}$ | $\chi^2_{\text{para,calc}} / 10^{-6} \text{ cm}^3 \cdot \text{g}^{-1}$ | [Ni] / mol·L <sup>-1</sup> | [Ni(py)] / mol·L <sup>-1</sup> | [Ni(py) <sub>2</sub> ] / mol·L <sup>-1</sup> |
|--------|-----------------|-----------------------------------------------------------------------|------------------------------------------------------------------------|----------------------------|--------------------------------|----------------------------------------------|
| 0      | 0.50            | 1.060                                                                 | 1.060                                                                  | 2.92·10 <sup>-3</sup>      | 0                              | 0                                            |
| 0.25   | 3.35            | 3.370                                                                 | 3.055                                                                  | 2.26·10 <sup>-3</sup>      | 6.64·10 <sup>-4</sup>          | 2.22·10 <sup>-6</sup>                        |
| 0.5    | 5.61            | 4.530                                                                 | 4.908                                                                  | 1.64·10 <sup>-3</sup>      | 1.27·10 <sup>-3</sup>          | 1.13·10 <sup>-5</sup>                        |
| 0.75   | 9.37            | 6.910                                                                 | 6.500                                                                  | 1.11·10 <sup>-3</sup>      | 1.78·10 <sup>-3</sup>          | 3.27·10 <sup>-5</sup>                        |
| 1      | 10.14           | 7.690                                                                 | 7.681                                                                  | 7.14·10 <sup>-4</sup>      | 2.14·10 <sup>-3</sup>          | 7.30·10 <sup>-5</sup>                        |
| 1.5    | 12.71           | 8.590                                                                 | 8.849                                                                  | 3.24·10 <sup>-4</sup>      | 2.40·10 <sup>-3</sup>          | 2.02·10 <sup>-4</sup>                        |
| 2      | 16.66           | 9.150                                                                 | 9.265                                                                  | 1.85·10 <sup>-4</sup>      | 2.39·10 <sup>-3</sup>          | 3.51·10 <sup>-4</sup>                        |
| 2.5    | 18.01           | 9.330                                                                 | 9.451                                                                  | 1.23·10 <sup>-4</sup>      | 2.31·10 <sup>-3</sup>          | 4.94·10 <sup>-4</sup>                        |
| 3      | 19.64           | 9.770                                                                 | 9.553                                                                  | 8.90·10 <sup>-5</sup>      | 2.21·10 <sup>-3</sup>          | 6.25·10 <sup>-4</sup>                        |
| 3.5    | 19.99           | 9.640                                                                 | 9.616                                                                  | 6.81·10 <sup>-5</sup>      | 2.11·10 <sup>-3</sup>          | 7.46·10 <sup>-4</sup>                        |
| 4      | 20.95           | 9.780                                                                 | 9.658                                                                  | 5.41·10 <sup>-5</sup>      | 2.01·10 <sup>-3</sup>          | 8.56·10 <sup>-4</sup>                        |
| 4.5    | 20.76           | 9.830                                                                 | 9.688                                                                  | 4.42·10 <sup>-5</sup>      | 1.92·10 <sup>-3</sup>          | 9.56·10 <sup>-4</sup>                        |
| 5      | 20.89           | 9.780                                                                 | 9.710                                                                  | 3.69·10 <sup>-5</sup>      | 1.84·10 <sup>-3</sup>          | 1.05·10 <sup>-3</sup>                        |
| 6      | 20.78           | 9.690                                                                 | 9.739                                                                  | 2.69·10 <sup>-5</sup>      | 1.69·10 <sup>-3</sup>          | 1.21·10 <sup>-3</sup>                        |
| 7      | 20.69           | 9.690                                                                 | 9.758                                                                  | 2.06·10 <sup>-5</sup>      | 1.56·10 <sup>-3</sup>          | 1.35·10 <sup>-3</sup>                        |
| 8      | 20.97           | 9.760                                                                 | 9.771                                                                  | 1.63·10 <sup>-5</sup>      | 1.44·10 <sup>-3</sup>          | 1.46·10 <sup>-3</sup>                        |
| 9      | 21.02           | 9.720                                                                 | 9.780                                                                  | 1.32·10 <sup>-5</sup>      | 1.34·10 <sup>-3</sup>          | 1.57·10 <sup>-3</sup>                        |
| 10     | 21.18           | 9.820                                                                 | 9.787                                                                  | 1.09·10 <sup>-5</sup>      | 1.26·10 <sup>-3</sup>          | 1.65·10 <sup>-3</sup>                        |
| 15     | 20.48           | 9.690                                                                 | 9.804                                                                  | 5.21·10 <sup>-6</sup>      | 9.48·10 <sup>-4</sup>          | 1.97·10 <sup>-3</sup>                        |
| 20     | 20.69           | 9.600                                                                 | 9.811                                                                  | 3.04·10 <sup>-6</sup>      | 7.59·10 <sup>-4</sup>          | 2.16·10 <sup>-3</sup>                        |
| 25     | 20.84           | 9.610                                                                 | 9.814                                                                  | 2.00·10 <sup>-6</sup>      | 6.33·10 <sup>-4</sup>          | 2.29·10 <sup>-3</sup>                        |

**Table S15.** Results for Evans NMR titration experiments of complex **1d** in DCM-d<sub>2</sub> (2.92 mmol·L<sup>-1</sup>) with pyridine at 250 K and comparison with the values obtained by nonlinear fitting with EST for the solvent coordination model. The mean square error is 0.067·10<sup>-6</sup> cm<sup>3</sup>·g<sup>-1</sup>. The concentrations of all species at every titration step are given.

| eq. Py | $\Delta f$ / Hz | $\chi^2_{\text{para,exp}} / 10^{-6} \text{ cm}^3 \cdot \text{g}^{-1}$ | $\chi^2_{\text{para,calc}} / 10^{-6} \text{ cm}^3 \cdot \text{g}^{-1}$ | [Ni] / mol·L <sup>-1</sup> | [Ni(py)] / mol·L <sup>-1</sup> | [Ni(py) <sub>2</sub> ] / mol·L <sup>-1</sup> |
|--------|-----------------|-----------------------------------------------------------------------|------------------------------------------------------------------------|----------------------------|--------------------------------|----------------------------------------------|
| 0      | 0.50            | 1.320                                                                 | 1.320                                                                  | 2.92·10 <sup>-3</sup>      | 0                              | 0                                            |
| 0.25   | 3.35            | 4.220                                                                 | 3.469                                                                  | 2.22·10 <sup>-3</sup>      | 7.00·10 <sup>-4</sup>          | 9.29·10 <sup>-13</sup>                       |
| 0.5    | 5.61            | 5.150                                                                 | 5.539                                                                  | 1.55·10 <sup>-3</sup>      | 1.37·10 <sup>-3</sup>          | 5.14·10 <sup>-12</sup>                       |
| 0.75   | 9.37            | 8.010                                                                 | 7.411                                                                  | 9.41·10 <sup>-4</sup>      | 1.98·10 <sup>-3</sup>          | 1.77·10 <sup>-12</sup>                       |
| 1      | 10.14           | 8.730                                                                 | 8.790                                                                  | 4.92·10 <sup>-4</sup>      | 2.43·10 <sup>-3</sup>          | 5.08·10 <sup>-11</sup>                       |
| 1.5    | 12.71           | 9.550                                                                 | 9.784                                                                  | 1.68·10 <sup>-4</sup>      | 2.76·10 <sup>-3</sup>          | 1.91·10 <sup>-10</sup>                       |
| 2      | 16.66           | 9.690                                                                 | 10.013                                                                 | 9.33·10 <sup>-5</sup>      | 2.83·10 <sup>-3</sup>          | 3.63·10 <sup>-10</sup>                       |
| 2.5    | 18.01           | 9.880                                                                 | 10.104                                                                 | 6.39·10 <sup>-5</sup>      | 2.86·10 <sup>-3</sup>          | 5.40·10 <sup>-10</sup>                       |
| 3      | 19.64           | 10.300                                                                | 10.151                                                                 | 4.85·10 <sup>-5</sup>      | 2.88·10 <sup>-3</sup>          | 7.20·10 <sup>-10</sup>                       |
| 3.5    | 19.99           | 10.100                                                                | 10.180                                                                 | 3.90·10 <sup>-5</sup>      | 2.88·10 <sup>-3</sup>          | 9.00·10 <sup>-9</sup>                        |
| 4      | 20.95           | 10.200                                                                | 10.200                                                                 | 3.27·10 <sup>-5</sup>      | 2.89·10 <sup>-3</sup>          | 1.08·10 <sup>-9</sup>                        |
| 4.5    | 20.76           | 10.300                                                                | 10.214                                                                 | 2.81·10 <sup>-5</sup>      | 2.90·10 <sup>-3</sup>          | 1.26·10 <sup>-9</sup>                        |
| 5      | 20.89           | 10.300                                                                | 10.224                                                                 | 2.46·10 <sup>-5</sup>      | 2.90·10 <sup>-3</sup>          | 1.44·10 <sup>-9</sup>                        |
| 6      | 20.78           | 10.200                                                                | 10.239                                                                 | 1.97·10 <sup>-5</sup>      | 2.90·10 <sup>-3</sup>          | 1.81·10 <sup>-9</sup>                        |
| 7      | 20.69           | 10.200                                                                | 10.249                                                                 | 1.65·10 <sup>-5</sup>      | 2.91·10 <sup>-3</sup>          | 2.17·10 <sup>-9</sup>                        |
| 8      | 20.97           | 10.200                                                                | 10.257                                                                 | 1.41·10 <sup>-5</sup>      | 2.91·10 <sup>-3</sup>          | 2.53·10 <sup>-9</sup>                        |
| 9      | 21.02           | 10.200                                                                | 10.262                                                                 | 1.24·10 <sup>-5</sup>      | 2.91·10 <sup>-3</sup>          | 2.89·10 <sup>-9</sup>                        |
| 10     | 21.18           | 10.300                                                                | 10.266                                                                 | 1.10·10 <sup>-5</sup>      | 2.91·10 <sup>-3</sup>          | 3.26·10 <sup>-9</sup>                        |
| 15     | 20.48           | 10.200                                                                | 10.278                                                                 | 7.08·10 <sup>-6</sup>      | 2.92·10 <sup>-3</sup>          | 5.07·10 <sup>-9</sup>                        |
| 20     | 20.69           | 10.100                                                                | 10.284                                                                 | 5.22·10 <sup>-6</sup>      | 2.92·10 <sup>-3</sup>          | 6.88·10 <sup>-9</sup>                        |
| 25     | 20.84           | 10.100                                                                | 10.287                                                                 | 4.14·10 <sup>-6</sup>      | 2.92·10 <sup>-3</sup>          | 8.70·10 <sup>-9</sup>                        |

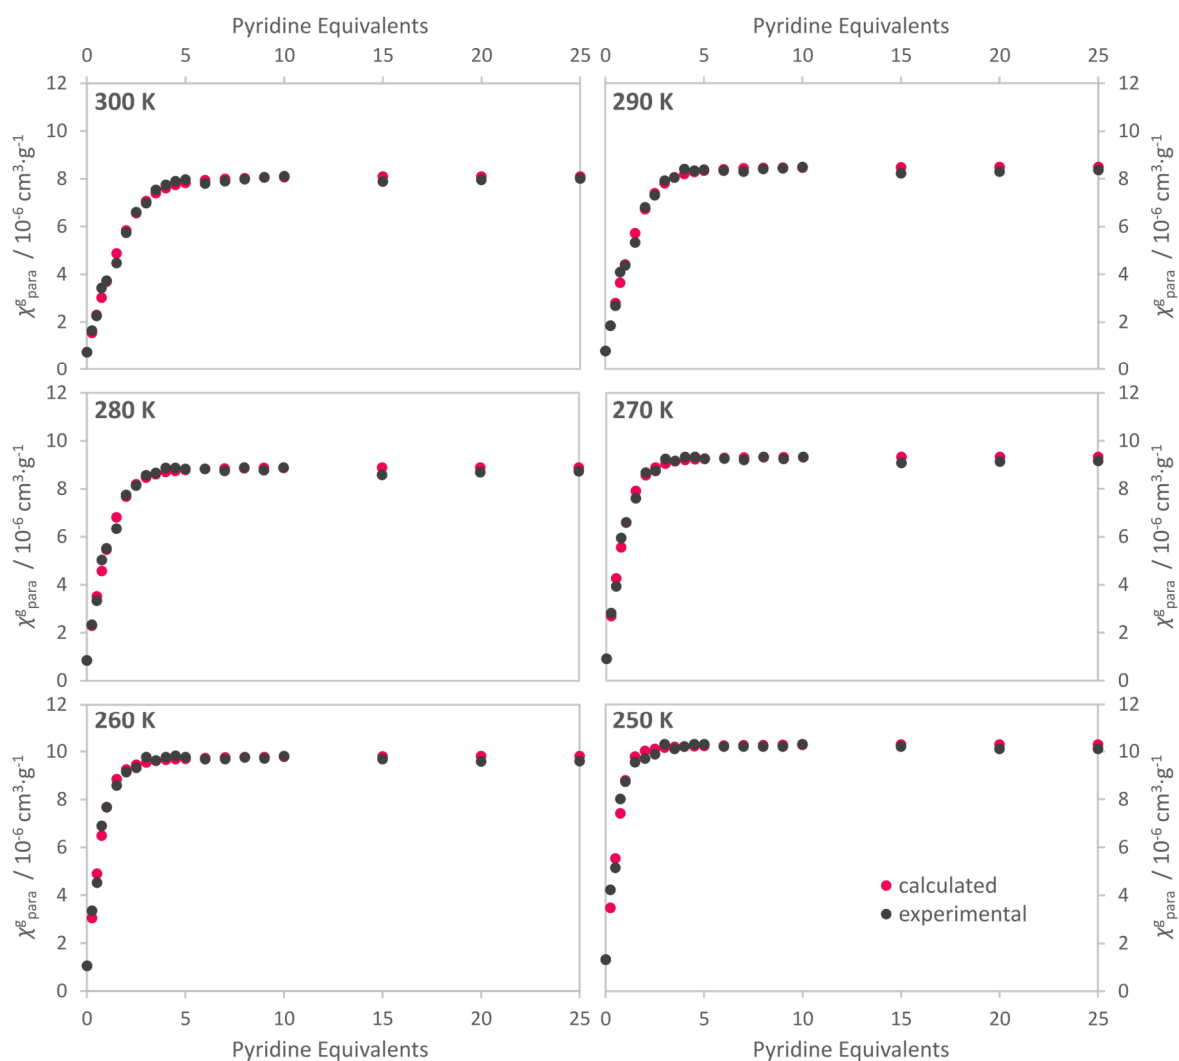

**Figure S13.** Experimental (black) and calculated pyridine titration curves (red) of **1d** in DCM- $d_2$  at different temperatures for the evaluation with the solvent coordination model.

**Table S16.** Association constants  $K_{1S}$  and  $K_2$  for the coordination for the first and second pyridine to complex **1d** in dichloromethane- $d_2$  at different temperatures for the evaluation with the solvent coordination model.

| $T / K$ | $K_{1S}$ | $K_2$             |
|---------|----------|-------------------|
| 300     | 275      | 1000              |
| 290     | 522      | 1008              |
| 280     | 1279     | 617               |
| 270     | 2785     | 339               |
| 260     | 4672     | 53                |
| 250     | 10057    | $4 \cdot 10^{-5}$ |

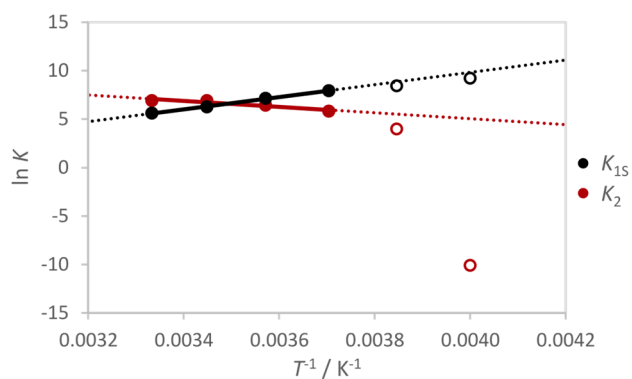

**Figure S14.** Van't Hoff plots of  $\ln K$  as a function of the reciprocal temperature for association constants  $K_{15}$  (red) and  $K_2$  (black) determined by the solvent coordination model. The values for 250 K and 260 K (open circles) were not considered.

Fitted straight lines from van't Hoff plots:

$$\ln K_{15} = -3058.86 \cdot \frac{1}{T} + 17.27 \quad (\text{S9})$$

$$\ln K_2 = 6351.28 \cdot \frac{1}{T} - 15.58 \quad (\text{S10})$$

**Table S17.** Binding enthalpies and entropies for the coordination of one or two pyridine ligands to **1d** when considering the solvent model. Association constants from 300-270 K were taken into account for the evaluation.

|                                                               | 1S  | 2   |
|---------------------------------------------------------------|-----|-----|
| $\Delta H / \text{kcal}\cdot\text{mol}^{-1}$                  | -13 | +6  |
| $\Delta S / \text{cal}\cdot\text{mol}^{-1}\cdot\text{K}^{-1}$ | -31 | +34 |

### S2.4.2 Dimer Model

Here it is assumed that the intrinsic paramagnetism of the solution is induced by dimer formation. Data evaluation is thus based on the formula

$$\chi_{\text{para}}^g = \frac{[\text{Ni}_2] \cdot \chi_{\text{para},0}^g + [\text{Ni}_2(\text{py})] \cdot \chi_{\text{para,int}}^g + \frac{1}{2} \cdot [\text{Ni}(\text{py})_2] \cdot \chi_{\text{para,max}}^g}{[\text{Ni}_2]_0} \quad (1)$$

where  $\chi_{\text{para},0}^g$  is the susceptibility in the absence of pyridine and  $\chi_{\text{para,max}}^g$  the highest measured susceptibility. Since it was assumed that the intermediary susceptibility of  $\text{Ni}_2(\text{py})$  is  $\chi_{\text{para,int}}^g = \chi_{\text{para,max}}^g$ , the formula is simplified to

$$\chi_{\text{para}}^g = \frac{[\text{Ni}_2] \cdot \chi_{\text{para},0}^g + \left([\text{Ni}_2(\text{py})] + \frac{1}{2} \cdot [\text{Ni}(\text{py})_2]\right) \cdot \chi_{\text{para,max}}^g}{[\text{Ni}_2]_0} \quad (\text{S11})$$

**Table S18.** Results for Evans NMR titration experiments of complex **1d<sub>2</sub>** in DCM-d<sub>2</sub> (1.46 mmol·L<sup>-1</sup>) with pyridine at 300 K and comparison with the values obtained by nonlinear fitting with EST for the dimer model. The mean square error is 0.022·10<sup>-6</sup> cm<sup>3</sup>·g<sup>-1</sup>. The concentrations of all species at every titration step are given.

| eq. Py | $\Delta f$ / Hz | $\chi_{\text{para,exp}}^g / 10^6 \text{ cm}^3 \cdot \text{g}^{-1}$ | $\chi_{\text{para,calc}}^g / 10^6 \text{ cm}^3 \cdot \text{g}^{-1}$ | $[\text{Ni}_2] / \text{mol} \cdot \text{L}^{-1}$ | $[\text{Ni}_2(\text{py})] / \text{mol} \cdot \text{L}^{-1}$ | $[\text{Ni}(\text{py})_2] / \text{mol} \cdot \text{L}^{-1}$ |
|--------|-----------------|--------------------------------------------------------------------|---------------------------------------------------------------------|--------------------------------------------------|-------------------------------------------------------------|-------------------------------------------------------------|
| 0      | 0.37            | 0.740                                                              | 0.740                                                               | 1.46·10 <sup>-3</sup>                            | 0                                                           | 0                                                           |
| 0.25   | 2.77            | 1.634                                                              | 1.625                                                               | 1.29·10 <sup>-3</sup>                            | 1.48·10 <sup>-4</sup>                                       | 5.58·10 <sup>-5</sup>                                       |
| 0.5    | 4.42            | 2.250                                                              | 2.394                                                               | 1.13·10 <sup>-3</sup>                            | 2.40·10 <sup>-4</sup>                                       | 1.77·10 <sup>-4</sup>                                       |
| 0.75   | 7.55            | 3.417                                                              | 3.082                                                               | 9.97·10 <sup>-4</sup>                            | 2.99·10 <sup>-4</sup>                                       | 3.33·10 <sup>-4</sup>                                       |
| 1      | 8.38            | 3.726                                                              | 3.707                                                               | 8.73·10 <sup>-4</sup>                            | 3.34·10 <sup>-4</sup>                                       | 5.10·10 <sup>-4</sup>                                       |
| 1.5    | 10.36           | 4.465                                                              | 4.798                                                               | 6.56·10 <sup>-4</sup>                            | 3.58·10 <sup>-4</sup>                                       | 8.97·10 <sup>-4</sup>                                       |
| 2      | 13.75           | 5.729                                                              | 5.708                                                               | 4.75·10 <sup>-4</sup>                            | 3.38·10 <sup>-4</sup>                                       | 1.30·10 <sup>-3</sup>                                       |
| 2.5    | 16.07           | 6.594                                                              | 6.452                                                               | 3.27·10 <sup>-4</sup>                            | 2.91·10 <sup>-4</sup>                                       | 1.69·10 <sup>-3</sup>                                       |
| 3      | 17.10           | 6.978                                                              | 7.032                                                               | 2.12·10 <sup>-4</sup>                            | 2.31·10 <sup>-4</sup>                                       | 2.04·10 <sup>-3</sup>                                       |
| 3.5    | 18.58           | 7.528                                                              | 7.453                                                               | 1.29·10 <sup>-4</sup>                            | 1.70·10 <sup>-4</sup>                                       | 2.33·10 <sup>-3</sup>                                       |
| 4      | 19.16           | 7.746                                                              | 7.728                                                               | 7.39·10 <sup>-5</sup>                            | 1.17·10 <sup>-4</sup>                                       | 2.54·10 <sup>-3</sup>                                       |
| 4.5    | 19.56           | 7.894                                                              | 7.892                                                               | 4.15·10 <sup>-5</sup>                            | 7.81·10 <sup>-5</sup>                                       | 2.68·10 <sup>-3</sup>                                       |
| 5      | 19.75           | 7.966                                                              | 7.982                                                               | 2.36·10 <sup>-5</sup>                            | 5.20·10 <sup>-5</sup>                                       | 2.77·10 <sup>-3</sup>                                       |
| 6      | 19.31           | 7.802                                                              | 8.057                                                               | 8.56·10 <sup>-6</sup>                            | 2.47·10 <sup>-5</sup>                                       | 2.86·10 <sup>-3</sup>                                       |
| 7      | 19.57           | 7.899                                                              | 8.082                                                               | 3.67·10 <sup>-6</sup>                            | 1.31·10 <sup>-5</sup>                                       | 2.89·10 <sup>-3</sup>                                       |
| 8      | 19.77           | 7.974                                                              | 8.091                                                               | 1.80·10 <sup>-6</sup>                            | 7.72·10 <sup>-6</sup>                                       | 2.90·10 <sup>-3</sup>                                       |
| 9      | 20.01           | 8.063                                                              | 8.096                                                               | 9.80·10 <sup>-7</sup>                            | 4.90·10 <sup>-6</sup>                                       | 2.91·10 <sup>-3</sup>                                       |
| 10     | 20.11           | 8.101                                                              | 8.098                                                               | 5.77·10 <sup>-7</sup>                            | 3.30·10 <sup>-6</sup>                                       | 2.92·10 <sup>-3</sup>                                       |
| 15     | 19.52           | 7.881                                                              | 8.100                                                               | 8.32·10 <sup>-8</sup>                            | 7.72·10 <sup>-7</sup>                                       | 2.92·10 <sup>-3</sup>                                       |
| 20     | 19.70           | 7.946                                                              | 8.100                                                               | 2.27·10 <sup>-8</sup>                            | 2.91·10 <sup>-7</sup>                                       | 2.92·10 <sup>-3</sup>                                       |
| 25     | 19.85           | 8.004                                                              | 8.101                                                               | 8.50·10 <sup>-9</sup>                            | 1.40·10 <sup>-7</sup>                                       | 2.92·10 <sup>-3</sup>                                       |

**Table S19.** Results for Evans NMR titration experiments of complex **1d<sub>2</sub>** in DCM-d<sub>2</sub> (1.46 mmol·L<sup>-1</sup>) with pyridine at 290 K and comparison with the values obtained by nonlinear fitting with EST for the dimer model. The mean square error is 0.026·10<sup>-6</sup> cm<sup>3</sup>·g<sup>-1</sup>. The concentrations of all species at every titration step are given.

| eq. Py | $\Delta f$ / Hz | $\chi^2_{\text{para,exp}} / 10^6 \text{ cm}^3 \cdot \text{g}^{-1}$ | $\chi^2_{\text{para,calc}} / 10^6 \text{ cm}^3 \cdot \text{g}^{-1}$ | $[\text{Ni}_2] / \text{mol} \cdot \text{L}^{-1}$ | $[\text{Ni}_2(\text{py})] / \text{mol} \cdot \text{L}^{-1}$ | $[\text{Ni}(\text{py})_2] / \text{mol} \cdot \text{L}^{-1}$ |
|--------|-----------------|--------------------------------------------------------------------|---------------------------------------------------------------------|--------------------------------------------------|-------------------------------------------------------------|-------------------------------------------------------------|
| 0      | 0.50            | 0.788                                                              | 0.788                                                               | $1.46 \cdot 10^{-3}$                             | 0                                                           | 0                                                           |
| 0.25   | 3.35            | 1.851                                                              | 1.958                                                               | $1.24 \cdot 10^{-3}$                             | $1.84 \cdot 10^{-4}$                                        | $7.50 \cdot 10^{-5}$                                        |
| 0.5    | 5.61            | 2.694                                                              | 2.899                                                               | $1.06 \cdot 10^{-3}$                             | $2.86 \cdot 10^{-4}$                                        | $2.28 \cdot 10^{-4}$                                        |
| 0.75   | 9.37            | 4.096                                                              | 3.707                                                               | $9.08 \cdot 10^{-4}$                             | $3.44 \cdot 10^{-4}$                                        | $4.18 \cdot 10^{-4}$                                        |
| 1      | 10.14           | 4.383                                                              | 4.420                                                               | $7.73 \cdot 10^{-4}$                             | $3.74 \cdot 10^{-4}$                                        | $6.29 \cdot 10^{-4}$                                        |
| 1.5    | 12.71           | 5.341                                                              | 5.626                                                               | $5.45 \cdot 10^{-4}$                             | $3.77 \cdot 10^{-4}$                                        | $1.08 \cdot 10^{-3}$                                        |
| 2      | 16.66           | 6.814                                                              | 6.589                                                               | $3.62 \cdot 10^{-4}$                             | $3.31 \cdot 10^{-4}$                                        | $1.54 \cdot 10^{-3}$                                        |
| 2.5    | 18.01           | 7.317                                                              | 7.332                                                               | $2.21 \cdot 10^{-4}$                             | $2.59 \cdot 10^{-4}$                                        | $1.96 \cdot 10^{-3}$                                        |
| 3      | 19.64           | 7.925                                                              | 7.860                                                               | $1.21 \cdot 10^{-4}$                             | $1.79 \cdot 10^{-4}$                                        | $2.32 \cdot 10^{-3}$                                        |
| 3.5    | 19.99           | 8.056                                                              | 8.183                                                               | $6.00 \cdot 10^{-5}$                             | $1.12 \cdot 10^{-4}$                                        | $2.58 \cdot 10^{-3}$                                        |
| 4      | 20.95           | 8.414                                                              | 8.350                                                               | $2.84 \cdot 10^{-5}$                             | $6.55 \cdot 10^{-5}$                                        | $2.74 \cdot 10^{-3}$                                        |
| 4.5    | 20.76           | 8.341                                                              | 8.427                                                               | $1.38 \cdot 10^{-5}$                             | $3.88 \cdot 10^{-5}$                                        | $2.82 \cdot 10^{-3}$                                        |
| 5      | 20.89           | 8.391                                                              | 8.462                                                               | $7.21 \cdot 10^{-6}$                             | $2.40 \cdot 10^{-5}$                                        | $2.86 \cdot 10^{-3}$                                        |
| 6      | 20.78           | 8.350                                                              | 8.487                                                               | $2.42 \cdot 10^{-6}$                             | $1.06 \cdot 10^{-5}$                                        | $2.90 \cdot 10^{-3}$                                        |
| 7      | 20.69           | 8.315                                                              | 8.494                                                               | $1.01 \cdot 10^{-6}$                             | $5.52 \cdot 10^{-6}$                                        | $2.91 \cdot 10^{-3}$                                        |
| 8      | 20.97           | 8.421                                                              | 8.497                                                               | $4.89 \cdot 10^{-7}$                             | $3.21 \cdot 10^{-6}$                                        | $2.92 \cdot 10^{-3}$                                        |
| 9      | 21.02           | 8.440                                                              | 8.498                                                               | $2.65 \cdot 10^{-7}$                             | $2.03 \cdot 10^{-6}$                                        | $2.92 \cdot 10^{-3}$                                        |
| 10     | 21.18           | 8.500                                                              | 8.499                                                               | $1.55 \cdot 10^{-7}$                             | $1.36 \cdot 10^{-6}$                                        | $2.92 \cdot 10^{-3}$                                        |
| 15     | 20.48           | 8.239                                                              | 8.499                                                               | $2.23 \cdot 10^{-8}$                             | $3.18 \cdot 10^{-7}$                                        | $2.92 \cdot 10^{-3}$                                        |
| 20     | 20.69           | 8.315                                                              | 8.500                                                               | $6.08 \cdot 10^{-9}$                             | $1.20 \cdot 10^{-7}$                                        | $2.92 \cdot 10^{-3}$                                        |
| 25     | 20.84           | 8.373                                                              | 8.500                                                               | $2.28 \cdot 10^{-9}$                             | $5.74 \cdot 10^{-8}$                                        | $2.92 \cdot 10^{-3}$                                        |

**Table S20.** Results for Evans NMR titration experiments of complex **1d<sub>2</sub>** in DCM-d<sub>2</sub> (1.46 mmol·L<sup>-1</sup>) with pyridine at 280 K and comparison with the values obtained by nonlinear fitting with EST for the dimer model. The mean square error is 0.032·10<sup>-6</sup> cm<sup>3</sup>·g<sup>-1</sup>. The concentrations of all species at every titration step are given.

| eq. Py | $\Delta f$ / Hz | $\chi^2_{\text{para,exp}} / 10^6 \text{ cm}^3 \cdot \text{g}^{-1}$ | $\chi^2_{\text{para,calc}} / 10^6 \text{ cm}^3 \cdot \text{g}^{-1}$ | $[\text{Ni}_2] / \text{mol} \cdot \text{L}^{-1}$ | $[\text{Ni}_2(\text{py})] / \text{mol} \cdot \text{L}^{-1}$ | $[\text{Ni}(\text{py})_2] / \text{mol} \cdot \text{L}^{-1}$ |
|--------|-----------------|--------------------------------------------------------------------|---------------------------------------------------------------------|--------------------------------------------------|-------------------------------------------------------------|-------------------------------------------------------------|
| 0      | 0.66            | 0.848                                                              | 0.848                                                               | $1.46 \cdot 10^{-3}$                             | 0                                                           | 0                                                           |
| 0.25   | 4.65            | 2.336                                                              | 2.495                                                               | $1.16 \cdot 10^{-3}$                             | $2.59 \cdot 10^{-4}$                                        | $8.11 \cdot 10^{-5}$                                        |
| 0.5    | 7.34            | 3.339                                                              | 3.680                                                               | $9.47 \cdot 10^{-4}$                             | $3.90 \cdot 10^{-4}$                                        | $2.50 \cdot 10^{-4}$                                        |
| 0.75   | 11.89           | 5.035                                                              | 4.621                                                               | $7.76 \cdot 10^{-4}$                             | $4.56 \cdot 10^{-4}$                                        | $4.60 \cdot 10^{-4}$                                        |
| 1      | 13.18           | 5.516                                                              | 5.402                                                               | $6.34 \cdot 10^{-4}$                             | $4.81 \cdot 10^{-4}$                                        | $6.94 \cdot 10^{-4}$                                        |
| 1.5    | 15.40           | 6.344                                                              | 6.634                                                               | $4.10 \cdot 10^{-4}$                             | $4.55 \cdot 10^{-4}$                                        | $1.19 \cdot 10^{-3}$                                        |
| 2      | 19.17           | 7.750                                                              | 7.539                                                               | $2.46 \cdot 10^{-4}$                             | $3.69 \cdot 10^{-4}$                                        | $1.69 \cdot 10^{-3}$                                        |
| 2.5    | 20.22           | 8.142                                                              | 8.174                                                               | $1.30 \cdot 10^{-4}$                             | $2.58 \cdot 10^{-4}$                                        | $2.15 \cdot 10^{-3}$                                        |
| 3      | 21.37           | 8.570                                                              | 8.565                                                               | $5.91 \cdot 10^{-5}$                             | $1.54 \cdot 10^{-4}$                                        | $2.50 \cdot 10^{-3}$                                        |
| 3.5    | 21.63           | 8.665                                                              | 8.758                                                               | $2.40 \cdot 10^{-5}$                             | $8.17 \cdot 10^{-5}$                                        | $2.71 \cdot 10^{-3}$                                        |
| 4      | 22.19           | 8.876                                                              | 8.836                                                               | $9.89 \cdot 10^{-6}$                             | $4.28 \cdot 10^{-5}$                                        | $2.82 \cdot 10^{-3}$                                        |
| 4.5    | 22.17           | 8.869                                                              | 8.865                                                               | $4.47 \cdot 10^{-6}$                             | $2.38 \cdot 10^{-5}$                                        | $2.87 \cdot 10^{-3}$                                        |
| 5      | 22.06           | 8.828                                                              | 8.878                                                               | $2.25 \cdot 10^{-6}$                             | $1.43 \cdot 10^{-5}$                                        | $2.89 \cdot 10^{-3}$                                        |
| 6      | 22.07           | 8.831                                                              | 8.886                                                               | $7.33 \cdot 10^{-7}$                             | $6.17 \cdot 10^{-6}$                                        | $2.91 \cdot 10^{-3}$                                        |
| 7      | 21.84           | 8.746                                                              | 8.888                                                               | $3.03 \cdot 10^{-7}$                             | $3.19 \cdot 10^{-6}$                                        | $2.92 \cdot 10^{-3}$                                        |
| 8      | 22.22           | 8.887                                                              | 8.889                                                               | $1.47 \cdot 10^{-7}$                             | $1.85 \cdot 10^{-6}$                                        | $2.92 \cdot 10^{-3}$                                        |
| 9      | 21.93           | 8.779                                                              | 8.890                                                               | $7.93 \cdot 10^{-8}$                             | $1.17 \cdot 10^{-6}$                                        | $2.92 \cdot 10^{-3}$                                        |
| 10     | 22.24           | 8.895                                                              | 8.890                                                               | $4.65 \cdot 10^{-8}$                             | $7.82 \cdot 10^{-7}$                                        | $2.92 \cdot 10^{-3}$                                        |
| 15     | 21.40           | 8.582                                                              | 8.890                                                               | $6.68 \cdot 10^{-9}$                             | $1.82 \cdot 10^{-7}$                                        | $2.92 \cdot 10^{-3}$                                        |
| 20     | 21.68           | 8.686                                                              | 8.890                                                               | $1.82 \cdot 10^{-9}$                             | $6.88 \cdot 10^{-8}$                                        | $2.92 \cdot 10^{-3}$                                        |
| 25     | 21.83           | 8.742                                                              | 8.890                                                               | $6.82 \cdot 10^{-10}$                            | $3.30 \cdot 10^{-8}$                                        | $2.92 \cdot 10^{-3}$                                        |

**Table S21.** Results for Evans NMR titration experiments of complex **1d<sub>2</sub>** in DCM-d<sub>2</sub> (1.46 mmol·L<sup>-1</sup>) with pyridine at 270 K and comparison with the values obtained by nonlinear fitting with EST for the dimer model. The mean square error is 0.042·10<sup>-6</sup> cm<sup>3</sup>·g<sup>-1</sup>. The concentrations of all species at every titration step are given.

| eq. Py | $\Delta f$ / Hz | $\chi^2_{\text{para,exp}} / 10^6 \text{ cm}^3 \cdot \text{g}^{-1}$ | $\chi^2_{\text{para,calc}} / 10^6 \text{ cm}^3 \cdot \text{g}^{-1}$ | $[\text{Ni}_2] / \text{mol} \cdot \text{L}^{-1}$ | $[\text{Ni}_2(\text{py})] / \text{mol} \cdot \text{L}^{-1}$ | $[\text{Ni}(\text{py})_2] / \text{mol} \cdot \text{L}^{-1}$ |
|--------|-----------------|--------------------------------------------------------------------|---------------------------------------------------------------------|--------------------------------------------------|-------------------------------------------------------------|-------------------------------------------------------------|
| 0      | 0.86            | 0.922                                                              | 0.922                                                               | $1.46 \cdot 10^{-3}$                             | 0                                                           | 0                                                           |
| 0.25   | 5.98            | 2.831                                                              | 3.073                                                               | $1.09 \cdot 10^{-3}$                             | $3.27 \cdot 10^{-4}$                                        | $9.29 \cdot 10^{-5}$                                        |
| 0.5    | 8.94            | 3.935                                                              | 4.490                                                               | $8.42 \cdot 10^{-4}$                             | $4.75 \cdot 10^{-4}$                                        | $2.88 \cdot 10^{-4}$                                        |
| 0.75   | 14.37           | 5.960                                                              | 5.547                                                               | $6.59 \cdot 10^{-4}$                             | $5.37 \cdot 10^{-4}$                                        | $5.32 \cdot 10^{-4}$                                        |
| 1      | 16.10           | 6.605                                                              | 6.382                                                               | $5.14 \cdot 10^{-4}$                             | $5.47 \cdot 10^{-4}$                                        | $8.02 \cdot 10^{-4}$                                        |
| 1.5    | 18.79           | 7.608                                                              | 7.624                                                               | $2.98 \cdot 10^{-4}$                             | $4.76 \cdot 10^{-4}$                                        | $1.37 \cdot 10^{-3}$                                        |
| 2      | 21.66           | 8.679                                                              | 8.466                                                               | $1.52 \cdot 10^{-4}$                             | $3.41 \cdot 10^{-4}$                                        | $1.94 \cdot 10^{-3}$                                        |
| 2.5    | 21.84           | 8.746                                                              | 8.988                                                               | $6.11 \cdot 10^{-5}$                             | $1.92 \cdot 10^{-4}$                                        | $2.42 \cdot 10^{-3}$                                        |
| 3      | 23.18           | 9.245                                                              | 9.232                                                               | $1.88 \cdot 10^{-5}$                             | $8.43 \cdot 10^{-5}$                                        | $2.72 \cdot 10^{-3}$                                        |
| 3.5    | 22.97           | 9.167                                                              | 9.308                                                               | $5.56 \cdot 10^{-6}$                             | $3.46 \cdot 10^{-5}$                                        | $2.84 \cdot 10^{-3}$                                        |
| 4      | 23.41           | 9.331                                                              | 9.329                                                               | $1.96 \cdot 10^{-6}$                             | $1.59 \cdot 10^{-5}$                                        | $2.89 \cdot 10^{-3}$                                        |
| 4.5    | 23.41           | 9.331                                                              | 9.335                                                               | $8.29 \cdot 10^{-7}$                             | $8.39 \cdot 10^{-6}$                                        | $2.91 \cdot 10^{-3}$                                        |
| 5      | 23.18           | 9.245                                                              | 9.338                                                               | $4.05 \cdot 10^{-7}$                             | $4.91 \cdot 10^{-6}$                                        | $2.91 \cdot 10^{-3}$                                        |
| 6      | 23.25           | 9.271                                                              | 9.339                                                               | $1.29 \cdot 10^{-7}$                             | $2.09 \cdot 10^{-6}$                                        | $2.92 \cdot 10^{-3}$                                        |
| 7      | 23.09           | 9.212                                                              | 9.340                                                               | $5.32 \cdot 10^{-8}$                             | $1.07 \cdot 10^{-6}$                                        | $2.92 \cdot 10^{-3}$                                        |
| 8      | 23.40           | 9.327                                                              | 9.340                                                               | $2.57 \cdot 10^{-8}$                             | $6.21 \cdot 10^{-7}$                                        | $2.92 \cdot 10^{-3}$                                        |
| 9      | 23.19           | 9.249                                                              | 9.340                                                               | $1.39 \cdot 10^{-8}$                             | $3.91 \cdot 10^{-7}$                                        | $2.92 \cdot 10^{-3}$                                        |
| 10     | 23.44           | 9.342                                                              | 9.340                                                               | $8.13 \cdot 10^{-9}$                             | $2.62 \cdot 10^{-7}$                                        | $2.92 \cdot 10^{-3}$                                        |
| 15     | 22.74           | 9.081                                                              | 9.340                                                               | $1.17 \cdot 10^{-9}$                             | $6.11 \cdot 10^{-8}$                                        | $2.92 \cdot 10^{-3}$                                        |
| 20     | 22.89           | 9.135                                                              | 9.340                                                               | $3.17 \cdot 10^{-10}$                            | $2.30 \cdot 10^{-8}$                                        | $2.92 \cdot 10^{-3}$                                        |
| 25     | 22.95           | 9.160                                                              | 9.340                                                               | $1.19 \cdot 10^{-10}$                            | $1.10 \cdot 10^{-8}$                                        | $2.92 \cdot 10^{-3}$                                        |



**Table S22.** Results for Evans NMR titration experiments of complex **1d<sub>2</sub>** in DCM-d<sub>2</sub> (1.46 mmol·L<sup>-1</sup>) with pyridine at 260 K and comparison with the values obtained by nonlinear fitting with EST for the dimer model. The mean square error is 0.064·10<sup>-6</sup> cm<sup>3</sup>·g<sup>-1</sup>. The concentrations of all species at every titration step are given.

| eq. Py | $\Delta f$ / Hz | $\chi^E_{\text{para,exp}} / 10^6 \text{ cm}^3 \cdot \text{g}^{-1}$ | $\chi^E_{\text{para,calc}} / 10^6 \text{ cm}^3 \cdot \text{g}^{-1}$ | $[\text{Ni}_2] / \text{mol} \cdot \text{L}^{-1}$ | $[\text{Ni}_2(\text{py})] / \text{mol} \cdot \text{L}^{-1}$ | $[\text{Ni}(\text{py})_2] / \text{mol} \cdot \text{L}^{-1}$ |
|--------|-----------------|--------------------------------------------------------------------|---------------------------------------------------------------------|--------------------------------------------------|-------------------------------------------------------------|-------------------------------------------------------------|
| 0      | 1.23            | 1.060                                                              | 1.060                                                               | $1.46 \cdot 10^{-3}$                             | 0                                                           | 0                                                           |
| 0.25   | 7.43            | 3.372                                                              | 3.664                                                               | $1.03 \cdot 10^{-3}$                             | $4.00 \cdot 10^{-4}$                                        | $6.98 \cdot 10^{-5}$                                        |
| 0.5    | 10.53           | 4.528                                                              | 5.320                                                               | $7.51 \cdot 10^{-4}$                             | $5.89 \cdot 10^{-4}$                                        | $2.43 \cdot 10^{-4}$                                        |
| 0.75   | 16.92           | 6.911                                                              | 6.453                                                               | $5.62 \cdot 10^{-4}$                             | $6.63 \cdot 10^{-4}$                                        | $4.74 \cdot 10^{-4}$                                        |
| 1      | 19.00           | 7.687                                                              | 7.281                                                               | $4.24 \cdot 10^{-4}$                             | $6.69 \cdot 10^{-4}$                                        | $7.38 \cdot 10^{-4}$                                        |
| 1.5    | 21.42           | 8.589                                                              | 8.409                                                               | $2.35 \cdot 10^{-4}$                             | $5.73 \cdot 10^{-4}$                                        | $1.31 \cdot 10^{-3}$                                        |
| 2      | 22.93           | 9.152                                                              | 9.110                                                               | $1.19 \cdot 10^{-4}$                             | $4.09 \cdot 10^{-4}$                                        | $1.87 \cdot 10^{-3}$                                        |
| 2.5    | 23.40           | 9.327                                                              | 9.524                                                               | $4.95 \cdot 10^{-5}$                             | $2.38 \cdot 10^{-4}$                                        | $2.35 \cdot 10^{-3}$                                        |
| 3      | 24.58           | 9.767                                                              | 9.721                                                               | $1.66 \cdot 10^{-5}$                             | $1.12 \cdot 10^{-4}$                                        | $2.67 \cdot 10^{-3}$                                        |
| 3.5    | 24.24           | 9.641                                                              | 9.788                                                               | $5.26 \cdot 10^{-6}$                             | $4.86 \cdot 10^{-5}$                                        | $2.82 \cdot 10^{-3}$                                        |
| 4      | 24.61           | 9.779                                                              | 9.809                                                               | $1.91 \cdot 10^{-6}$                             | $2.30 \cdot 10^{-5}$                                        | $2.87 \cdot 10^{-3}$                                        |
| 4.5    | 24.76           | 9.833                                                              | 9.815                                                               | $8.21 \cdot 10^{-7}$                             | $1.22 \cdot 10^{-5}$                                        | $2.90 \cdot 10^{-3}$                                        |
| 5      | 24.61           | 9.779                                                              | 9.818                                                               | $4.03 \cdot 10^{-7}$                             | $7.20 \cdot 10^{-6}$                                        | $2.91 \cdot 10^{-3}$                                        |
| 6      | 24.38           | 9.693                                                              | 9.819                                                               | $1.29 \cdot 10^{-7}$                             | $3.07 \cdot 10^{-6}$                                        | $2.92 \cdot 10^{-3}$                                        |
| 7      | 24.37           | 9.689                                                              | 9.820                                                               | $5.32 \cdot 10^{-8}$                             | $1.58 \cdot 10^{-6}$                                        | $2.92 \cdot 10^{-3}$                                        |
| 8      | 24.56           | 9.760                                                              | 9.820                                                               | $2.57 \cdot 10^{-8}$                             | $9.15 \cdot 10^{-7}$                                        | $2.92 \cdot 10^{-3}$                                        |
| 9      | 24.46           | 9.723                                                              | 9.820                                                               | $1.39 \cdot 10^{-8}$                             | $5.76 \cdot 10^{-7}$                                        | $2.92 \cdot 10^{-3}$                                        |
| 10     | 24.73           | 9.823                                                              | 9.820                                                               | $8.14 \cdot 10^{-9}$                             | $3.86 \cdot 10^{-7}$                                        | $2.92 \cdot 10^{-3}$                                        |
| 15     | 24.38           | 9.693                                                              | 9.820                                                               | $1.17 \cdot 10^{-9}$                             | $9.01 \cdot 10^{-8}$                                        | $2.92 \cdot 10^{-3}$                                        |
| 20     | 24.13           | 9.598                                                              | 9.820                                                               | $3.18 \cdot 10^{-10}$                            | $3.39 \cdot 10^{-8}$                                        | $2.92 \cdot 10^{-3}$                                        |
| 25     | 24.17           | 9.615                                                              | 9.820                                                               | $1.19 \cdot 10^{-10}$                            | $1.63 \cdot 10^{-8}$                                        | $2.92 \cdot 10^{-3}$                                        |

**Table S23.** Results for Evans NMR titration experiments of complex **1d<sub>2</sub>** in DCM-d<sub>2</sub> (1.46 mmol·L<sup>-1</sup>) with pyridine at 250 K and comparison with the values obtained by nonlinear fitting with EST for the dimer model. The mean square error is 0.102·10<sup>-6</sup> cm<sup>3</sup>·g<sup>-1</sup>. The concentrations of all species at every titration step are given.

| eq. Py | $\Delta f$ / Hz | $\chi^2_{\text{para,exp}} / 10^6 \text{ cm}^3 \cdot \text{g}^{-1}$ | $\chi^2_{\text{para,calc}} / 10^6 \text{ cm}^3 \cdot \text{g}^{-1}$ | $[\text{Ni}_2] / \text{mol} \cdot \text{L}^{-1}$ | $[\text{Ni}_2(\text{py})] / \text{mol} \cdot \text{L}^{-1}$ | $[\text{Ni}(\text{py})_2] / \text{mol} \cdot \text{L}^{-1}$ |
|--------|-----------------|--------------------------------------------------------------------|---------------------------------------------------------------------|--------------------------------------------------|-------------------------------------------------------------|-------------------------------------------------------------|
| 0      | 1.94            | 1.325                                                              | 1.320                                                               | $1.46 \cdot 10^{-3}$                             | 0                                                           | 0                                                           |
| 0.25   | 9.70            | 4.219                                                              | 4.355                                                               | $9.68 \cdot 10^{-4}$                             | $4.69 \cdot 10^{-4}$                                        | $5.05 \cdot 10^{-5}$                                        |
| 0.5    | 12.20           | 5.151                                                              | 6.257                                                               | $6.58 \cdot 10^{-4}$                             | $7.03 \cdot 10^{-4}$                                        | $2.02 \cdot 10^{-4}$                                        |
| 0.75   | 19.88           | 8.015                                                              | 7.441                                                               | $4.65 \cdot 10^{-4}$                             | $7.85 \cdot 10^{-4}$                                        | $4.24 \cdot 10^{-4}$                                        |
| 1      | 21.80           | 8.731                                                              | 8.230                                                               | $3.37 \cdot 10^{-4}$                             | $7.83 \cdot 10^{-4}$                                        | $6.84 \cdot 10^{-4}$                                        |
| 1.5    | 24.00           | 9.551                                                              | 9.203                                                               | $1.79 \cdot 10^{-4}$                             | $6.57 \cdot 10^{-4}$                                        | $1.25 \cdot 10^{-3}$                                        |
| 2      | 24.37           | 9.689                                                              | 9.756                                                               | $8.85 \cdot 10^{-5}$                             | $4.67 \cdot 10^{-4}$                                        | $1.81 \cdot 10^{-3}$                                        |
| 2.5    | 24.87           | 9.876                                                              | 10.068                                                              | $3.77 \cdot 10^{-5}$                             | $2.77 \cdot 10^{-4}$                                        | $2.29 \cdot 10^{-3}$                                        |
| 3      | 25.94           | 10.275                                                             | 10.218                                                              | $1.34 \cdot 10^{-5}$                             | $1.37 \cdot 10^{-4}$                                        | $2.62 \cdot 10^{-3}$                                        |
| 3.5    | 25.56           | 10.133                                                             | 10.272                                                              | $4.50 \cdot 10^{-6}$                             | $6.21 \cdot 10^{-5}$                                        | $2.79 \cdot 10^{-3}$                                        |
| 4      | 25.65           | 10.166                                                             | 10.290                                                              | $1.68 \cdot 10^{-6}$                             | $3.00 \cdot 10^{-5}$                                        | $2.86 \cdot 10^{-3}$                                        |
| 4.5    | 26.00           | 10.297                                                             | 10.296                                                              | $7.29 \cdot 10^{-7}$                             | $1.61 \cdot 10^{-5}$                                        | $2.89 \cdot 10^{-3}$                                        |
| 5      | 26.05           | 10.316                                                             | 10.298                                                              | $3.60 \cdot 10^{-7}$                             | $9.53 \cdot 10^{-6}$                                        | $2.90 \cdot 10^{-3}$                                        |
| 6      | 25.64           | 10.163                                                             | 10.299                                                              | $1.16 \cdot 10^{-7}$                             | $4.08 \cdot 10^{-6}$                                        | $2.92 \cdot 10^{-3}$                                        |
| 7      | 25.71           | 10.187                                                             | 10.300                                                              | $4.78 \cdot 10^{-8}$                             | $2.10 \cdot 10^{-6}$                                        | $2.92 \cdot 10^{-3}$                                        |
| 8      | 25.68           | 10.178                                                             | 10.300                                                              | $2.31 \cdot 10^{-8}$                             | $1.22 \cdot 10^{-6}$                                        | $2.92 \cdot 10^{-3}$                                        |
| 9      | 25.74           | 10.200                                                             | 10.300                                                              | $1.25 \cdot 10^{-8}$                             | $7.68 \cdot 10^{-7}$                                        | $2.92 \cdot 10^{-3}$                                        |
| 10     | 25.97           | 10.286                                                             | 10.300                                                              | $7.32 \cdot 10^{-9}$                             | $5.14 \cdot 10^{-7}$                                        | $2.92 \cdot 10^{-3}$                                        |
| 15     | 25.64           | 10.163                                                             | 10.300                                                              | $1.05 \cdot 10^{-9}$                             | $1.20 \cdot 10^{-7}$                                        | $2.92 \cdot 10^{-3}$                                        |
| 20     | 25.51           | 10.112                                                             | 10.300                                                              | $2.86 \cdot 10^{-10}$                            | $4.52 \cdot 10^{-8}$                                        | $2.92 \cdot 10^{-3}$                                        |
| 25     | 25.50           | 10.110                                                             | 10.300                                                              | $1.07 \cdot 10^{-10}$                            | $2.17 \cdot 10^{-8}$                                        | $2.92 \cdot 10^{-3}$                                        |

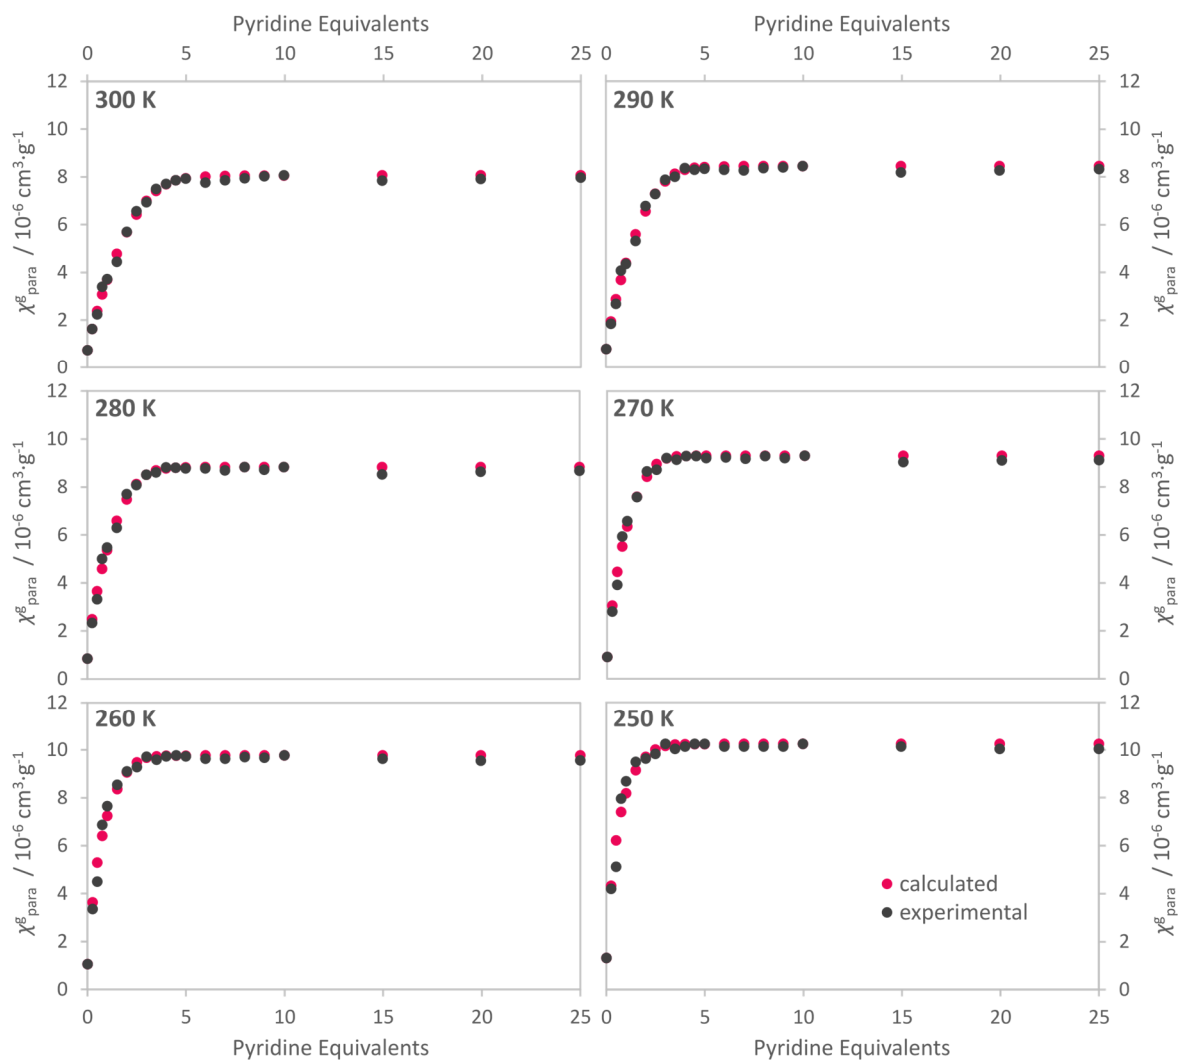

**Figure S15.** Experimental (black) and calculated pyridine titration curves (red) of **1d** in DCM-d<sub>2</sub> at different temperatures for the evaluation with the dimer model.

Fitted straight lines from van't Hoff Plots:

$$\ln K_{1S} = 940.20 \cdot \frac{1}{T} + 0.26 \quad (\text{S12})$$

$$\ln K_2 = 4743.62 \cdot \frac{1}{T} - 10.36 \quad (\text{S13})$$

### S3 Selected Crystal Data

**Table S24.** Selected crystal data and details of the structure refinements.

|                                                                             | <b>1a</b>                                                       | <b>1a(py)<sub>2</sub></b>                                                | <b>1a<sub>2</sub>(EtOH)<sub>3</sub></b>                                        |
|-----------------------------------------------------------------------------|-----------------------------------------------------------------|--------------------------------------------------------------------------|--------------------------------------------------------------------------------|
| Formula                                                                     | C <sub>15</sub> H <sub>12</sub> N <sub>2</sub> NiO <sub>5</sub> | C <sub>32.50</sub> H <sub>29.50</sub> N <sub>5.50</sub> NiO <sub>5</sub> | C <sub>42</sub> H <sub>60</sub> N <sub>4</sub> Ni <sub>2</sub> O <sub>16</sub> |
| <i>M</i> / g·mol <sup>-1</sup>                                              | 358.98                                                          | 635.82                                                                   | 994.36                                                                         |
| Crystal system                                                              | monoclinic                                                      | monoclinic                                                               | triclinic                                                                      |
| Space group                                                                 | <i>C2/c</i>                                                     | <i>P2<sub>1</sub>/n</i>                                                  | <i>P-1</i>                                                                     |
| <i>a</i> / Å                                                                | 21.7637(9)                                                      | 11.4677(2)                                                               | 13.5292(9)                                                                     |
| <i>b</i> / Å                                                                | 6.8956(3)                                                       | 16.1148(4)                                                               | 13.8175(11)                                                                    |
| <i>c</i> / Å                                                                | 18.7940(7)                                                      | 15.6428(4)                                                               | 14.1756(11)                                                                    |
| <i>α</i> / °                                                                | 90                                                              | 90                                                                       | 92.609(7)                                                                      |
| <i>β</i> / °                                                                | 101.478(3)                                                      | 90.183(2)                                                                | 100.302(6)                                                                     |
| <i>γ</i> / °                                                                | 90                                                              | 90                                                                       | 116.725(6)                                                                     |
| <i>V</i> / Å <sup>3</sup>                                                   | 2764.1(2)                                                       | 2890.77(11)                                                              | 2304.7(3)                                                                      |
| <i>T</i> / K                                                                | 170                                                             | 170                                                                      | 170                                                                            |
| <i>Z</i>                                                                    | 8                                                               | 4                                                                        | 2                                                                              |
| <i>D</i> <sub>calc</sub> / mg·m <sup>3</sup>                                | 1.725                                                           | 1.461                                                                    | 1.433                                                                          |
| <i>μ</i> / mm <sup>-1</sup>                                                 | 1.433                                                           | 0.724                                                                    | 0.890                                                                          |
| <i>θ</i> <sub>max</sub> / °                                                 | 26.005                                                          | 27.899                                                                   | 26.004                                                                         |
| min/max. trans.                                                             | 0.7360/0.8440                                                   | 0.8554/0.9375                                                            | 0.8064/0.9093                                                                  |
| Refl. collected                                                             | 11650                                                           | 35572                                                                    | 17517                                                                          |
| Unique refl.                                                                | 2717                                                            | 6890                                                                     | 8835                                                                           |
| <i>R</i> <sub>int</sub>                                                     | 0.0526                                                          | 0.0317                                                                   | 0.0347                                                                         |
| Refl. [ <i>F</i> <sub>0</sub> >4σ( <i>F</i> <sub>0</sub> )]                 | 2151                                                            | 6048                                                                     | 6489                                                                           |
| Parameters                                                                  | 210                                                             | 399                                                                      | 609                                                                            |
| <i>R</i> <sub>1</sub> [ <i>F</i> <sub>0</sub> >4σ( <i>F</i> <sub>0</sub> )] | 0.0559                                                          | 0.0356                                                                   | 0.0500                                                                         |
| <i>wR</i> <sub>2</sub>                                                      | 0.1121                                                          | 0.0829                                                                   | 0.1201                                                                         |
| GOF                                                                         | 1.073                                                           | 1.041                                                                    | 1.039                                                                          |
| <i>Δρ</i> <sub>max/min</sub> / e·Å <sup>-3</sup>                            | 0.556/ -0.452                                                   | 0.492/-0.413                                                             | 0.346/ -0.501                                                                  |

S3.1 [6,6'-(1-methoxy-1,1-ethylenediyl)bis(2-pyridinecarboxylato-N,O)]nickel(II) (1a)

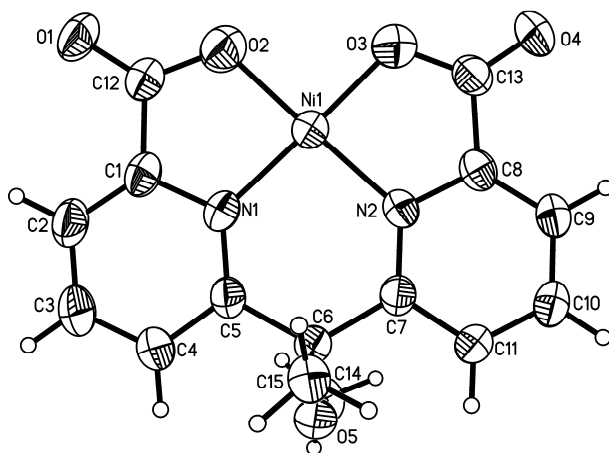

Figure S16. ORTEP plot of **1a** with labeling and displacement ellipsoids drawn at the 50 % probability level.

Table S25. Selected bond lengths [Å] and angles [°] for **1a**.

|                 |            |                 |            |
|-----------------|------------|-----------------|------------|
| Ni(1)-O(3)      | 1.850(3)   | Ni(1)-N(1)      | 1.863(4)   |
| Ni(1)-O(2)      | 1.853(3)   | Ni(1)-N(2)      | 1.865(4)   |
| O(3)-Ni(1)-O(2) | 92.07(16)  | O(3)-Ni(1)-N(2) | 85.89(15)  |
| O(3)-Ni(1)-N(1) | 176.70(16) | O(2)-Ni(1)-N(2) | 177.31(16) |
| O(2)-Ni(1)-N(1) | 85.51(15)  | N(1)-Ni(1)-N(2) | 96.46(15)  |

S3.2 [6,6'-(1-methoxy-1,1-ethanediyl)bis(2-pyridinecarboxylato-N,O)]di(pyridine)nickel(II) (**1a**(py)<sub>2</sub>)

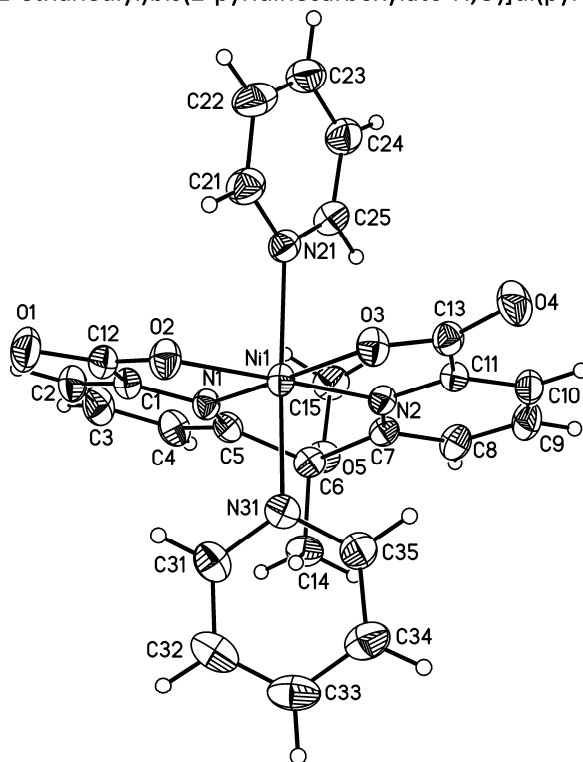

**Figure S17.** ORTEP plot of **1a**(py)<sub>2</sub> with labeling and displacement ellipsoids drawn at the 50% probability level.

**Table S26.** Selected bond lengths [Å] and angles [°] for **1a**(py)<sub>2</sub>.

|                  |            |                   |            |
|------------------|------------|-------------------|------------|
| Ni(1)-O(2)       | 2.0308(12) | Ni(1)-O(3)        | 2.0330(11) |
| Ni(1)-N(1)       | 2.0322(13) | Ni(1)-N(31)       | 2.1422(14) |
| Ni(1)-N(2)       | 2.0322(13) | Ni(1)-N(21)       | 2.2075(14) |
| O(2)-Ni(1)-N(1)  | 82.01(5)   | N(2)-Ni(1)-N(31)  | 90.81(5)   |
| O(2)-Ni(1)-N(2)  | 173.37(5)  | O(3)-Ni(1)-N(31)  | 90.64(5)   |
| N(1)-Ni(1)-N(2)  | 91.48(5)   | O(2)-Ni(1)-N(21)  | 88.73(5)   |
| O(2)-Ni(1)-O(3)  | 104.15(5)  | N(1)-Ni(1)-N(21)  | 91.59(5)   |
| N(1)-Ni(1)-O(3)  | 172.43(5)  | N(2)-Ni(1)-N(21)  | 90.22(5)   |
| N(2)-Ni(1)-O(3)  | 82.25(5)   | O(3)-Ni(1)-N(21)  | 84.22(5)   |
| O(2)-Ni(1)-N(31) | 90.85(5)   | N(31)-Ni(1)-N(21) | 174.58(5)  |
| N(1)-Ni(1)-N(31) | 93.70(5)   | C(25)-N(21)-Ni(1) | 123.81(11) |
| C(5)-N(1)-Ni(1)  | 128.52(11) | C(21)-N(21)-Ni(1) | 118.73(12) |
| C(1)-N(1)-Ni(1)  | 110.96(10) | C(35)-N(31)-Ni(1) | 119.95(12) |
| C(7)-N(2)-Ni(1)  | 128.86(11) | C(31)-N(31)-Ni(1) | 122.71(12) |
| C(11)-N(2)-Ni(1) | 111.06(10) | C(13)-O(3)-Ni(1)  | 113.60(10) |
| C(12)-O(2)-Ni(1) | 114.38(10) |                   |            |

S3.3 (Di{ethanol}{6-[1-methoxy-1-(2-carboxylato-6-pyridyl-N,O)-1-ethyl][ $\mu^2$ -2-pyridinecarboxylato-N,O,O']}]nickel(III))(ethanol)[6,6'-(1-methoxy-1,1-ethanediyl)bis(2-pyridinecarboxylato-N,O)]nickel(III) ( $1a_2(\text{EtOH})_3$ )

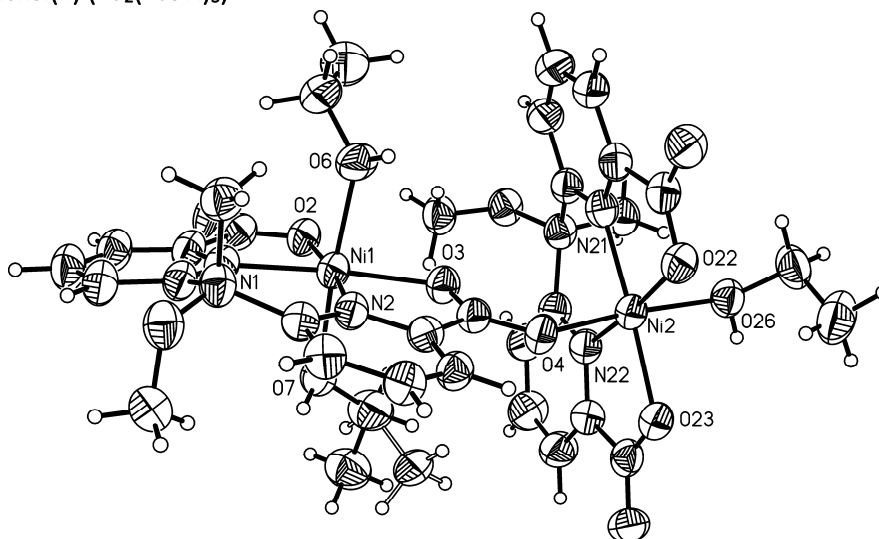

**Figure S18.** ORTEP plot of  $1a_2(\text{EtOH})_3$  with labeling and displacement ellipsoids drawn at the 50% probability level. Please note that only selected atoms are labeled and that disordering is shown as full and open bonds.

**Table S27.** Selected bond lengths [Å] and angles [°] for  $1a_2(\text{EtOH})_3$ .

|                 |            |                   |            |
|-----------------|------------|-------------------|------------|
| Ni(1)-N(2)      | 2.015(3)   | Ni(2)-N(21)       | 2.020(3)   |
| Ni(1)-O(2)      | 2.031(3)   | Ni(2)-N(22)       | 2.028(3)   |
| Ni(1)-O(3)      | 2.035(2)   | Ni(2)-O(23)       | 2.048(2)   |
| Ni(1)-N(1)      | 2.036(3)   | Ni(2)-O(22)       | 2.049(2)   |
| Ni(1)-O(6)      | 2.091(2)   | Ni(2)-O(26)       | 2.127(2)   |
| Ni(1)-O(7)      | 2.136(2)   | O(4)-Ni(2)        | 2.055(2)   |
| N(2)-Ni(1)-O(2) | 172.76(11) | N(21)-Ni(2)-N(22) | 92.44(11)  |
| N(2)-Ni(1)-O(3) | 83.07(10)  | N(21)-Ni(2)-O(23) | 174.39(11) |
| O(2)-Ni(1)-O(3) | 103.48(10) | N(22)-Ni(2)-O(23) | 81.95(11)  |
| N(2)-Ni(1)-N(1) | 91.30(12)  | N(21)-Ni(2)-O(22) | 82.04(10)  |
| O(2)-Ni(1)-N(1) | 82.02(11)  | N(22)-Ni(2)-O(22) | 174.38(10) |
| O(3)-Ni(1)-N(1) | 173.87(11) | O(23)-Ni(2)-O(22) | 103.57(10) |
| N(2)-Ni(1)-O(6) | 90.78(11)  | N(21)-Ni(2)-O(4)  | 94.86(10)  |
| O(2)-Ni(1)-O(6) | 92.63(10)  | N(22)-Ni(2)-O(4)  | 95.87(11)  |
| O(3)-Ni(1)-O(6) | 86.89(10)  | O(23)-Ni(2)-O(4)  | 85.56(9)   |
| N(1)-Ni(1)-O(6) | 95.64(11)  | O(22)-Ni(2)-O(4)  | 85.68(10)  |
| N(2)-Ni(1)-O(7) | 90.37(10)  | N(21)-Ni(2)-O(26) | 90.79(10)  |
| O(2)-Ni(1)-O(7) | 86.74(10)  | N(22)-Ni(2)-O(26) | 88.05(11)  |
| O(3)-Ni(1)-O(7) | 88.81(9)   | O(23)-Ni(2)-O(26) | 89.22(10)  |
| N(1)-Ni(1)-O(7) | 88.81(10)  | O(22)-Ni(2)-O(26) | 90.97(10)  |
| O(6)-Ni(1)-O(7) | 175.38(11) | O(4)-Ni(2)-O(26)  | 172.97(10) |

## S4 References

- 1 M. J. Frisch, G. W. Trucks, H. B. Schlegel, G. E. Scuseria, M. A. Robb, J. R. Cheeseman, G. Scalmani, V. Barone, B. Mennucci, G. A. Petersson, H. Nakatsuji, M. Caricato, X. Li, H. P. Hratchian, A. F. Izmaylov, J. Bloino, G. Zheng, J. L. Sonnenberg, M. Hada, M. Ehara, K. Toyota, R. Fukuda, J. Hasegawa, M. Ishida, T. Nakajima, Y. Honda, O. Kitao, H. Nakai, T. Vreven, J. A. Montgomery, Jr., J. E. Peralta, F. Ogliaro, M. Bearpark, J. J. Heyd, E. Brothers, K. N. Kudin, V. N. Staroverov, T. Keith, R. Kobayashi, J. Normand, K. Raghavachari, A. Rendell, J. C. Burant, S. S. Iyengar, J. Tomasi, M. Cossi, N. Rega, J. M. Millam, M. Klene, J. E. Knox, J. B. Cross, V. Bakken, C. Adamo, J. Jaramillo, R. Gomperts, R. E. Stratmann, O. Yazyev, A. J. Austin, R. Cammi, C. Pomelli, J. W. Ochterski, R. L. Martin, K. Morokuma, V. G. Zakrzewski, G. A. Voth, P. Salvador, J. J. Dannenberg, S. Dapprich, A. D. Daniels, O. Farkas, J. B. Foresman, J. V. Ortiz, J. Cioslowski and D. J. Fox, *Gaussian 09. Revision D.01*, Gaussian, Inc., Wallingford CT, 2013.
- 2 Perdew, Burke and Ernzerhof, *Phys. Rev. Lett.*, 1996, **77**, 3865–3868.
- 3 J. P. Perdew, K. Burke and M. Ernzerhof, *Phys. Rev. Lett.*, 1997, **78**, 1396.
- 4 F. Weigend and R. Ahlrichs, *Phys. Chem. Chem. Phys.*, 2005, **7**, 3297–3305.
- 5 F. Weigend, *Phys. Chem. Chem. Phys.*, 2006, **8**, 1057–1065.
- 6 A. D. Becke, *J. Chem. Phys.*, 1993, **98**, 5648–5652.
- 7 M. Dommaschk, C. Schütt, S. Venkataramani, U. Jana, C. Näther, F. D. Sönnichsen and R. Herges, *Dalton Trans.*, 2014, **43**, 17395–17405.
- 8 D. F. Evans, *J. Chem. Soc.*, 1959, 2003–2005.
- 9 D. H. Live and S. I. Chan, *Anal. Chem.*, 1970, **42**, 791–792.
- 10 G. A. Bain and J. F. Berry, *J. Chem. Educ.*, 2008, **85**, 532.
- 11 D. H. Grant, *J. Chem. Educ.*, 1995, **72**, 39–40.
- 12 E. Riedel, ed., *Moderne Anorganische Chemie*, De Gruyter, Berlin, 3rd edn., 2007.
- 13 S. del Piero, A. Melchior, P. Polese, R. Portanova and M. Tolazzi, *Ann. Chim.*, 2006, **96**, 29–49.
- 14 P. W. Atkins and J. de Paula, *Physikalische Chemie*, VCH, Weinheim, 4th edn., 2006.
